# Supplementary material for: Rapid outbreak sequencing of Ebola virus in Sierra Leone identifies transmission chains linked to sporadic cases
Source: Virus Evol. 2016 Jun 22;2(1):vew016. doi: 10.1093/ve/vew016 (PMC5499387; doi:10.1093/ve/vew016)
Supplement: Supplementary Data [file vew016_Supp_01.zip › Supplementary_Tables.pdf]

# SM Table 1 Page 1 Metadata 554

| Genome_name         | GenBank  | Sample collection date | Specimen type | District      | Genome_length | Mapped_reads | Median_read_length | Coverage |
|---------------------|----------|------------------------|---------------|---------------|---------------|--------------|--------------------|----------|
| 0106_C2_KT2315      | KU296812 | 02/12/2014             | blood         | Port_Loko     | 18882         | 22368        | 210                | 225.08   |
| 0106_C2_KT2316      | KU296774 | 02/12/2014             | blood         | Port_Loko     | 18879         | 22791        | 204                | 222.13   |
| 0106_C2_KT2317      | KU296735 | 02/12/2014             | blood         | Port_Loko     | 18402         | 57068        | 201                | 561.31   |
| 0106_C2_KT2321      | KU296762 | 02/12/2014             | blood         | Port_Loko     | 18884         | 46702        | 208                | 464.94   |
| 0106_C2_KT2449      | KU296465 | 05/12/2014             | blood         | Western_Urban | 18872         | 74014        | 185                | 647.11   |
| 0106_C2_KT2641      | KU296709 | 12/12/2014             | blood         | not_stated    | 18479         | 22233        | 207                | 224.99   |
| 0106_C2_PL7375      | KU296498 | 27/05/2015             | blood         | Port_Loko     | 18451         | 22058        | 194                | 208.02   |
| 0109_C2_020380_EMLK | KU296775 | 28/08/2015             | swab          | Kambia        | 18881         | 176039       | 186                | 1547.72  |
| 0205_C1_PL5249      | KU296744 | 24/03/2015             | blood         | Kambia        | 18746         | 73893        | 179                | 626.75   |
| 0205_C1_PL5260      | KU296591 | 23/03/2015             | swab          | Kambia        | 18768         | 170858       | 193                | 1574.93  |
| 0205_C1_PL5294      | KU296764 | 24/03/2015             | swab          | Kambia        | 18889         | 248158       | 200                | 2364.78  |
| 0205_C1_PL5361      | KU296415 | 26/03/2015             | swab          | Kambia        | 18885         | 65350        | 207                | 647.10   |
| 0205_C1_PL5428      | KU296532 | 27/03/2015             | swab          | Kambia        | 18542         | 261383       | 170                | 2114.53  |
| 0205_C2_PL5674      | KU296699 | 31/03/2015             | blood         | Port_Loko     | 18886         | 221357       | 206                | 2180.04  |
| 0205_C2_PL5801      | KU296844 | 04/04/2015             | swab          | Kambia        | 18449         | 298675       | 192                | 2784.54  |
| 0205_C2_PL5803      | KU296795 | 04/04/2015             | blood         | Kambia        | 18889         | 351931       | 214                | 3614.52  |
| 0205_C2_PL5868      | KU296550 | 06/04/2015             | swab          | Kambia        | 18439         | 252021       | 217                | 2692.56  |
| 0205_C2_PL5950      | KU296559 | 08/04/2015             | blood         | Port_Loko     | 18872         | 28266        | 212                | 287.57   |
| 0205_C2_PL6049      | KU296743 | 11/04/2015             | blood         | Kambia        | 18881         | 66818        | 210                | 672.39   |
| 0205_C2_PL6070      | KU296614 | 11/04/2015             | swab          | Kambia        | 18338         | 162077       | 214                | 1714.63  |
| 0205_C2_PL6086      | KU296651 | 12/04/2015             | blood         | Kambia        | 18437         | 211192       | 189                | 1935.85  |
| 0205_C2_PL6158      | KU296308 | 13/04/2015             | swab          | Kambia        | 18873         | 99401        | 205                | 974.37   |
| 0208_C1_77667_EMLK  | KU296361 | 08/01/2015             | non_stated    | non_stated    | 18777         | 65915        | 211                | 670.49   |
| 0208_C1_77669_EMLK  | KU296367 | 08/01/2015             | blood         | Western_Urban | 18883         | 32173        | 217                | 335.65   |
| 0208_C1_77670_EMLK  | KU296329 | 08/01/2015             | blood         | Western_Urban | 18884         | 67597        | 216                | 701.60   |
| 0208_C1_77673_EMLK  | KU296458 | 08/01/2015             | blood         | Western_Urban | 18872         | 48434        | 215                | 500.46   |
| 0208_C1_77675_EMLK  | KU296807 | 08/01/2015             | blood         | Western_Urban | 18883         | 40215        | 217                | 419.55   |
| 0208_C1_77676_EMLK  | KU296309 | 08/01/2015             | blood         | Western_Urban | 18884         | 192707       | 215                | 1989.93  |
| 0208_C1_77677_EMLK  | KU296558 | 08/01/2015             | blood         | Western_Urban | 18881         | 74070        | 210                | 745.37   |
| 0208_C1_77679_EMLK  | KU296512 | 08/01/2015             | blood         | Western_Urban | 18882         | 44679        | 217                | 466.14   |
| 0208_C1_77681_EMLK  | KU296435 | 08/01/2015             | blood         | not_stated    | 18749         | 100436       | 201                | 969.59   |
| 0208_C1_MK10128R    | KU296502 | 31/07/2015             | blood         | Tonkolili     | 18747         | 250036       | 217                | 2627.48  |
| 0208_C1_MK10173     | KU296313 | 01/08/2015             | blood         | Tonkolili     | 18881         | 164722       | 216                | 1709.94  |
| 0208_C2_KT4828R     | KU296745 | 10/02/2015             | swab          | not_stated    | 18872         | 104731       | 208                | 1043.31  |
| 0208_C2_KT4935R     | KU296467 | 11/02/2015             | swab          | Western_Rural | 18868         | 134078       | 205                | 1314.63  |
| 0208_C2_KT5022R     | KU296519 | 13/02/2015             | swab          | WesterN       | 18266         | 95732        | 205                | 969.59   |
| 0208_C2_KT5245R     | KU296411 | 22/02/2015             | blood         | not_stated    | 18882         | 82287        | 205                | 806.22   |
| 0305_C1_PL4651      | KU296841 | 12/03/2015             | blood         | Port_Loko     | 18886         | 83743        | 203                | 811.45   |
| 0305_C1_PL4696      | KU296513 | 13/03/2015             | blood         | Port_Loko     | 18308         | 210962       | 214                | 2235.45  |
| 0305_C1_PL4844      | KU296527 | 16/03/2015             | blood         | Port_Loko     | 18887         | 73763        | 214                | 757.66   |
| 0305_C1_PL4932      | KU296547 | 18/03/2015             | blood         | Port_Loko     | 18751         | 193466       | 217                | 2032.57  |
| 0305_C1_PL5025      | KU296412 | 20/03/2015             | blood         | Kambia        | 18749         | 104038       | 211                | 1059.86  |
| 0305_C1_PL5201      | KU296612 | 23/03/2015             | blood         | Port_Loko     | 18885         | 114067       | 208                | 1135.54  |
| 0305_C1_PL5202      | KU296396 | 23/03/2015             | blood         | Port_Loko     | 18874         | 124214       | 214                | 1276.75  |
| 0305_C1_PL5228      | KU296535 | 23/03/2015             | blood         | Port_Loko     | 18873         | 47212        | 205                | 462.79   |
| 0305_C2_PL4570      | KU296451 | 10/03/2015             | blood         | Port_Loko     | 18885         | 73612        | 212                | 748.40   |
| 0507_C1_PL4226      | KU296615 | 02/03/2015             | blood         | Kambia        | 18791         | 45766        | 188                | 409.17   |
| 0507_C1_PL4248      | KU296658 | 03/03/2015             | blood         | Port_Loko     | 18873         | 65562        | 183                | 566.24   |
| 0507_C1_PL4249      | KU296349 | 03/03/2015             | blood         | Port_Loko     | 18874         | 27614        | 203                | 267.74   |
| 0507_C1_PL4283      | KU296840 | 03/03/2015             | blood         | Port_Loko     | 18886         | 89889        | 189                | 804.37   |
| 0507_C1_PL4322      | KU296677 | 05/03/2015             | swab          | Port_Loko     | 18876         | 73001        | 201                | 700.00   |
| 0507_C1_PL4443      | KU296418 | 07/03/2015             | swab          | Port_Loko     | 18874         | 87265        | 201                | 836.87   |
| 0507_C1_PL4671      | KU296782 | 12/03/2015             | blood         | Port_Loko     | 18798         | 100067       | 180                | 851.73   |
| 0507_C1_PL4679      | KU296623 | 12/03/2015             | blood         | not_stated    | 18872         | 12920        | 200                | 123.23   |
| 0507_C1_PL4680      | KU296689 | 12/03/2015             | swab          | not_stated    | 18750         | 31006        | 174                | 254.66   |
| 0507_C1_PL5179      | KU296638 | 22/03/2015             | blood         | Port_Loko     | 18884         | 38093        | 184                | 330.82   |
| 0507_C2_MK0390      | KU296398 | 22/12/2014             | blood         | Bombali       | 18773         | 138811       | 184                | 1212.64  |
| 0507_C2_MK0392      | KU296691 | 22/12/2014             | blood         | Bombali       | 18872         | 16637        | 190                | 149.87   |
| 0507_C2_MK0664      | KU296761 | 30/12/2014             | blood         | not_stated    | 18751         | 11548        | 209                | 116.40   |
| 0507_C2_MK0725      | KU296629 | 01/01/2015             | blood         | Bombali       | 18749         | 20610        | 200                | 197.87   |
| 0806_C1_KT4677      | KU296608 | 03/02/2015             | swab          | Western_Rural | 18883         | 224411       | 210                | 2258.02  |
| 0806_C1_KT4695      | KU296549 | 04/02/2015             | swab          | Western_Rural | 18874         | 299420       | 201                | 2871.42  |
| 0806_C1_KT4715      | KU296707 | 06/02/2015             | blood         | not_stated    | 18067         | 54997        | 160                | 426.17   |
| 0806_C1_KT4730      | KU296416 | 07/02/2015             | blood         | not_stated    | 18875         | 80866        | 209                | 809.73   |
| 0806_C1_KT4801      | KU296722 | 10/02/2015             | blood         | not_stated    | 18748         | 31149        | 191                | 284.11   |
| 0806_C1_KT5073      | KU296553 | 16/02/2015             | blood         | not_stated    | 18873         | 189462       | 210                | 1907.36  |
| 0806_C1_MK1040      | KU296528 | 11/01/2015             | blood         | Bombali       | 18751         | 18280        | 204                | 179.38   |
| 0806_C1_MK1079      | KU296815 | 11/01/2015             | swab          | Bombali       | 18751         | 110593       | 190                | 1002.66  |
| 0806_C1_PL7376      | KU296740 | 27/05/2015             | blood         | Port_Loko     | 18878         | 104508       | 210                | 1051.83  |
| 0806_C1_PL7401      | KU296819 | 27/05/2015             | blood         | Port_Loko     | 18876         | 51737        | 206                | 509.81   |
| 0806_C1_PL7429      | KU296617 | 29/05/2015             | blood         | Port_Loko     | 18871         | 54029        | 201                | 518.21   |
| 0806_C1_PL7451      | KU296837 | 29/05/2015             | blood         | Port_Loko     | 18873         | 20206        | 203                | 195.93   |
| 0806_C1_PL7496      | KU296846 | 31/05/2015             | blood         | Port_Loko     | 18758         | 6501         | 206                | 64.46    |
| 0806_C1_PL7511      | KU296685 | 01/06/2015             | blood         | Port_Loko     | 18400         | 88043        | 218                | 947.42   |
| 0806_C1_PL7551      | KU296322 | 02/06/2015             | blood         | Port_Loko     | 18872         | 77368        | 216                | 803.52   |
| 0806_C2_KT2669      | KU296726 | 13/12/2014             | blood         | not_stated    | 18870         | 16880        | 213                | 172.65   |
| 0806_C2_KT2810      | KU296778 | 16/12/2014             | blood         | not_stated    | 18749         | 54850        | 206                | 544.14   |
| 0806_C2_KT4054      | KU296429 | 13/01/2015             | blood         | not_stated    | 18750         | 49958        | 211                | 508.90   |
| 0806_C2_KT4553      | KU296698 | 29/01/2015             | blood         | not_stated    | 18885         | 156482       | 216                | 1624.07  |
| 0806_C2_KT4555      | KU296687 | 29/01/2015             | blood         | not_stated    | 18866         | 155041       | 216                | 1610.73  |
| 0806_C2_KT4622      | KU296587 | 01/02/2015             | blood         | not_stated    | 18885         | 26334        | 214                | 270.52   |
| 0806_C2_KT4631      | KU296607 | 02/02/2015             | blood         | Western_Urban | 18817         | 74450        | 210                | 751.74   |
| 0806_C2_KT4663      | KU296570 | 03/02/2015             | blood         | not_stated    | 18075         | 29261        | 216                | 317.30   |
| 0806_C2_PL1387      | KU296434 | 04/01/2015             | blood         | Port_Loko     | 18199         | 113783       | 216                | 1225.42  |
| 0806_C2_PL2101      | KU296714 | 18/01/2015             | blood         | Port_Loko     | 18873         | 16597        | 211                | 167.97   |
| 0806_C2_PL2668      | KU296294 | 29/01/2015             | blood         | Port_Loko     | 18075         | 96193        | 212                | 1021.80  |
| 0806_C2_PL2921      | KU296506 | 03/02/2015             | blood         | Kambia        | 17554         | 184316       | 214                | 2036.98  |
| 0807_C1_14729_EMLK  | KU296392 | 18/04/2015             | non_stated    | Kambia        | 18873         | 54394        | 161                | 406.38   |
| 0807_C1_14743_EMLK  | KU296298 | 19/04/2015             | non_stated    | Kambia        | 18872         | 90774        | 193                | 832.13   |
| 0807_C1_14748_EMLK  | KU296769 | 19/04/2015             | non_stated    | Kambia        | 18874         | 87490        | 179                | 737.04   |
| 0807_C1_14750_EMLK  | KU296459 | 20/04/2015             | non_stated    | Kambia        | 18874         | 64501        | 189                | 577.55   |

# SM Table 1 Page 2 Metadata 554

|                     |          |            |            |               |       |        |       |         |
|---------------------|----------|------------|------------|---------------|-------|--------|-------|---------|
| 0807_C1_PL3984      | KU296330 | 25/02/2015 | blood      | Port_Loko     | 18873 | 13005  | 201   | 124.72  |
| 0807_C1_PL4119      | KU296645 | 28/02/2015 | blood      | Port_Loko     | 18746 | 10272  | 201   | 99.18   |
| 0807_C1_PL4121      | KU296305 | 28/02/2015 | blood      | not_stated    | 18874 | 42714  | 198   | 402.83  |
| 0807_C1_PL4123      | KU296752 | 28/02/2015 | blood      | Port_Loko     | 18749 | 16453  | 206   | 163.22  |
| 0807_C1_PL4125      | KU296471 | 28/02/2015 | blood      | Port_Loko     | 18752 | 15352  | 206   | 152.28  |
| 0807_C1_PL4126      | KU296478 | 28/02/2015 | blood      | Port_Loko     | 18872 | 134554 | 201   | 1290.50 |
| 0807_C1_PL4763      | KU296503 | 14/03/2015 | blood      | Kambia        | 18882 | 9618   | 203   | 93.22   |
| 0807_C1_PL4784      | KU296660 | 14/03/2015 | blood      | Port_Loko     | 18735 | 5693   | 207   | 56.82   |
| 0807_C1_PL4785      | KU296688 | 14/03/2015 | blood      | Port_Loko     | 18868 | 22556  | 200   | 215.18  |
| 0807_C1_PL4804      | KU296766 | 15/03/2015 | blood      | Port_Loko     | 18875 | 50606  | 196   | 471.88  |
| 0807_C1_PL4813      | KU296798 | 14/03/2015 | blood      | Port_Loko     | 18750 | 38250  | 193   | 352.92  |
| 0807_C1_PL4864      | KU296437 | 16/03/2015 | blood      | Kambia        | 18872 | 35697  | 200   | 340.48  |
| 0807_C1_PL4865      | KU296633 | 16/03/2015 | blood      | Kambia        | 18747 | 41403  | 201   | 399.74  |
| 0807_C1_PL4866      | KU296390 | 16/03/2015 | blood      | Kambia        | 18749 | 58253  | 186   | 515.76  |
| 0807_C1_PL7577      | KU296385 | 03/06/2015 | blood      | Port_Loko     | 18888 | 36711  | 204   | 357.63  |
| 0807_C1_PL8429      | KU296440 | 24/06/2015 | blood      | Port_Loko     | 18873 | 34102  | 210   | 343.31  |
| 0807_C1_PL8486      | KU296446 | 25/06/2015 | blood      | Port_Loko     | 18883 | 27061  | 211.5 | 274.44  |
| 0807_C1_PL8630      | KU296325 | 29/06/2015 | blood      | Port_Loko     | 18880 | 60816  | 202   | 586.26  |
| 0807_C2_MK2826      | KU296405 | 08/03/2015 | blood      | Bombali       | 18678 | 115022 | 212   | 1182.37 |
| 0809_C1_020484_EMLK | KU296462 | 04-Sep-15  | blood      | Kambia        | 18882 | 74342  | 213   | 759.88  |
| 0809_C1_19560_EMLK  | KU296821 | 07/09/2015 | semen      | Kambia        | 18399 | 136255 | 214   | 1436.68 |
| 0908_C1_KT7105      | KU296319 | 16/07/2015 | blood      | Western_Urban | 18887 | 153158 | 217   | 1597.51 |
| 1007_C1_MK1782      | KU296792 | 06/02/2015 | blood      | not_stated    | 18872 | 81391  | 200   | 776.31  |
| 1007_C1_PL4028      | KU296552 | 26/02/2015 | blood      | Port_Loko     | 18874 | 27744  | 201   | 266.06  |
| 1007_C1_PL4059      | KU296485 | 26/02/2015 | blood      | Port_Loko     | 18886 | 60645  | 182   | 520.20  |
| 1007_C1_PL4094      | KU296476 | 27/02/2015 | blood      | Kambia        | 18889 | 83689  | 200   | 797.50  |
| 1007_C1_PL4187      | KU296567 | 01/03/2015 | blood      | Port_Loko     | 18886 | 42777  | 214   | 439.41  |
| 1007_C1_PL4190      | KU296351 | 01/03/2015 | blood      | Port_Loko     | 18874 | 93036  | 179   | 783.77  |
| 1007_C1_PL4346      | KU296641 | 04/03/2015 | swab       | Kambia        | 18871 | 148688 | 209   | 1489.16 |
| 1007_C2_MK0020      | KU296551 | 08/12/2014 | blood      | Bombali       | 18883 | 171095 | 214   | 1757.80 |
| 1007_C2_MK0024      | KU296705 | 08/12/2014 | blood      | Bombali       | 18870 | 6112   | 215   | 63.16   |
| 1007_C2_MK0045      | KU296776 | 09/12/2014 | blood      | Bombali       | 18885 | 384558 | 217   | 4011.54 |
| 1007_C2_MK0085      | KU296738 | 10/12/2014 | blood      | Bombali       | 18885 | 49849  | 215   | 514.72  |
| 1007_C2_MK0391      | KU296675 | 22/12/2014 | swab       | Bombali       | 18873 | 17660  | 200   | 168.43  |
| 1007_C2_MK0607      | KU296335 | 28/12/2014 | blood      | not_stated    | 18873 | 59361  | 201   | 569.30  |
| 1007_C2_MK0894      | KU296356 | 06/01/2015 | blood      | Bombali       | 18882 | 33970  | 216   | 352.62  |
| 1007_C2_MK1000      | KU296384 | 10/01/2015 | blood      | Bombali       | 18872 | 95311  | 203   | 924.22  |
| 1007_C2_MK1014      | KU296316 | 10/01/2015 | swab       | Bombali       | 18883 | 450143 | 210   | 4529.33 |
| 1007_C2_MK1888      | KU296708 | 09/02/2015 | blood      | not_stated    | 18749 | 9477   | 214   | 98.06   |
| 1007_C2_PL4105      | KU296694 | 28/02/2015 | blood      | Port_Loko     | 18749 | 26030  | 200   | 249.90  |
| 1009_C1_20524_EMLK  | KU296424 | 06/09/2015 | blood      | Kambia        | 18742 | 43503  | 204   | 427.09  |
| 1009_C1_20525_EMLK  | KU296487 | 06/09/2015 | blood      | Kambia        | 18742 | 177510 | 191   | 1619.59 |
| 1009_C1_20547_EMLK  | KU296455 | 07/09/2015 | blood      | Kambia        | 18253 | 159386 | 209   | 1650.35 |
| 1105_C1_MK2405      | KU296542 | 25/02/2015 | blood      | not_stated    | 18873 | 45512  | 215   | 470.24  |
| 1105_C1_MK2427      | KU296759 | 25/02/2015 | blood      | not_stated    | 18885 | 297062 | 215   | 3067.37 |
| 1105_C1_MK2431      | KU296562 | 25/02/2015 | swab       | not_stated    | 18885 | 351277 | 216   | 3645.77 |
| 1105_C1_MK2436      | KU296626 | 26/02/2015 | blood      | Bombali       | 18886 | 174632 | 210   | 1756.86 |
| 1105_C1_MK2673      | KU296749 | 03/03/2015 | swab       | Bombali       | 18322 | 339287 | 220   | 3703.60 |
| 1105_C1_MK2790      | KU296452 | 07/03/2015 | blood      | Bombali       | 18750 | 202572 | 188   | 1815.05 |
| 1105_C2_MK2334      | KU296366 | 23/02/2015 | swab       | not_stated    | 18315 | 127938 | 183   | 1539.12 |
| 1105_C2_MK2369      | KU296832 | 25/02/2015 | blood      | not_stated    | 18881 | 45850  | 212   | 466.24  |
| 1105_C2_MK2370      | KU296760 | 25/02/2015 | blood      | not_stated    | 18883 | 121860 | 209   | 1219.70 |
| 1105_C2_MK2371      | KU296397 | 25/02/2015 | blood      | not_stated    | 18441 | 295678 | 202   | 2918.14 |
| 1105_C2_MK2383R     | KU296583 | 25/02/2015 | blood      | Bombali       | 18738 | 129979 | 201   | 1255.53 |
| 1209_C1_020573_EMLK | KU296654 | not_stated | not_stated | not_stated    | 18816 | 140735 | 206   | 1391.20 |
| 1309_C2_MK13013     | KU296454 | 12/09/2015 | blood      | Bombali       | 18873 | 194356 | 209   | 1946.34 |
| 1507_C1_13204_EMLH  | KU296544 | 16/06/2015 | blood      | not_stated    | 18873 | 24606  | 192   | 224.25  |
| 1507_C1_13268_EMLH  | KU296603 | 23/06/2015 | blood      | Western_Urban | 18751 | 29128  | 193   | 268.74  |
| 1507_C1_13275_EMLH  | KU296430 | 24/06/2015 | blood      | not_stated    | 18871 | 17859  | 206   | 176.03  |
| 1507_C1_18538_EMLH  | KU296727 | 04/07/2015 | blood      | Western_Urban | 18751 | 41487  | 201   | 400.47  |
| 1507_C1_18596_EMLH  | KU296715 | 05/07/2015 | blood      | Western_Urban | 18749 | 18133  | 201   | 175.05  |
| 1507_C1_18636_EMLH  | KU296460 | 08/07/2015 | blood      | not_stated    | 18878 | 122717 | 193   | 1124.60 |
| 1507_C1_18647_EMLH  | KU296566 | 09/07/2015 | blood      | Western_Urban | 18746 | 12320  | 206   | 122.24  |
| 1507_C1_18648_EMLH  | KU296701 | 09/07/2015 | blood      | Western_Urban | 18866 | 71370  | 190   | 643.11  |
| 1507_C1_18649_EMLH  | KU296456 | 10/07/2015 | blood      | Western_Urban | 18872 | 56482  | 210   | 568.65  |
| 1507_C1_18650_EMLH  | KU296370 | 10/07/2015 | blood      | Western_Urban | 18873 | 114042 | 201   | 1093.71 |
| 1507_C1_18660_EMLH  | KU296838 | 10/07/2015 | blood      | Western_Urban | 18750 | 99038  | 200   | 950.76  |
| 1507_C1_18706_EMLH  | KU296599 | 14/07/2015 | blood      | not_stated    | 18891 | 63657  | 190   | 572.85  |
| 1507_C2_15543_EMLK  | KU296666 | 22/06/2015 | not_stated | Western_Urban | 18883 | 42018  | 194   | 387.18  |
| 1507_C2_15661_EMLK  | KU296822 | 28/06/2015 | not_stated | Kambia        | 18746 | 24266  | 201   | 234.30  |
| 1507_C2_15674_EMLK  | KU296843 | 28/06/2015 | not_stated | Kambia        | 18880 | 64474  | 201   | 618.11  |
| 1507_C2_15686_EMLK  | KU296555 | 30/06/2015 | not_stated | Kambia        | 18810 | 23378  | 190   | 211.29  |
| 1507_C2_19521_EMLK  | KU296306 | 05/07/2015 | not_stated | Kambia        | 18879 | 30346  | 209   | 303.80  |
| 1507_C2_MK0363      | KU296545 | 21/12/2014 | swab       | not_stated    | 18885 | 69984  | 190   | 629.99  |
| 1507_C2_MK0393      | KU296496 | 22/12/2014 | swab       | not_stated    | 18751 | 34708  | 176   | 288.75  |
| 1507_C2_MK0574      | KU296332 | 28/12/2014 | blood      | not_stated    | 18870 | 33016  | 202   | 318.44  |
| 1507_C2_MK0575      | KU296681 | 28/12/2014 | blood      | not_stated    | 18889 | 120323 | 188   | 1070.16 |
| 1507_C2_MK0584      | KU296339 | 28/12/2014 | blood      | Bombali       | 18788 | 168014 | 208   | 1681.22 |
| 1507_C2_MK0709      | KU296373 | 31/12/2014 | blood      | Tonkolili     | 18870 | 43658  | 199   | 414.14  |
| 1507_C2_MK0857      | KU296789 | 05/01/2015 | blood      | not_stated    | 18882 | 17095  | 213   | 174.74  |
| 1507_C2_MK0864      | KU296334 | 05/01/2015 | blood      | not_stated    | 18870 | 19926  | 209   | 199.58  |
| 1507_C2_MK0865      | KU296500 | 05/01/2015 | blood      | not_stated    | 18883 | 117107 | 201   | 1122.51 |
| 1507_C2_MK0866      | KU296497 | 05/01/2015 | blood      | not_stated    | 18882 | 31331  | 214   | 321.91  |
| 1507_C2_MK0867      | KU296748 | 05/01/2015 | blood      | not_stated    | 18872 | 29151  | 190   | 262.59  |
| 1507_C2_MK0868      | KU296537 | 05/01/2015 | swab       | not_stated    | 18874 | 84000  | 193   | 769.95  |
| 1507_C2_MK0869      | KU296534 | 05/01/2015 | swab       | Bombali       | 18752 | 154706 | 175   | 1278.76 |
| 1507_C2_MK0879      | KU296410 | 05/01/2015 | blood      | Port_Loko     | 18883 | 36799  | 213   | 376.12  |
| 1507_C2_MK0888      | KU296376 | 06/01/2015 | blood      | not_stated    | 18885 | 45742  | 203   | 443.25  |
| 1507_C2_MK0889      | KU296794 | 06/01/2015 | blood      | not_stated    | 18872 | 132989 | 125   | 739.93  |
| 1507_C2_MK0966      | KU296507 | 08/01/2015 | blood      | Bombali       | 18750 | 21909  | 188   | 196.31  |
| 1706_C1_KT4609      | KU296622 | 31/01/2015 | swab       | Western Area  | 18888 | 199822 | 220   | 2115.86 |
| 1706_C1_PL7604      | KU296592 | 04/06/2015 | blood      | Port_Loko     | 18882 | 228862 | 215   | 2363.52 |

# SM Table 1 Page 3 Metadata 554

|                    |          |            |             |               |       |        |     |         |
|--------------------|----------|------------|-------------|---------------|-------|--------|-----|---------|
| 1706_C1_PL7605     | KU296486 | 04/06/2015 | blood       | Port_Loko     | 18869 | 32725  | 214 | 336.46  |
| 1706_C1_PL7626     | KU296753 | 04/06/2015 | swab        | Port_Loko     | 18881 | 373169 | 205 | 3656.41 |
| 1706_C1_PL7678     | KU296625 | 06/06/2015 | swab        | Port_Loko     | 18869 | 46517  | 214 | 478.26  |
| 1706_C1_PL7685     | KU296556 | 06/06/2015 | blood       | Port_Loko     | 18881 | 71450  | 214 | 734.14  |
| 1706_C1_PL7709     | KU296426 | 06/06/2015 | blood       | Port_Loko     | 18261 | 249017 | 214 | 2645.49 |
| 1706_C1_PL7773     | KU296417 | 08/06/2015 | blood       | not_stated    | 18756 | 58911  | 210 | 596.77  |
| 1706_C1_PL7774     | KU296589 | 08/06/2015 | blood       | Port_Loko     | 18747 | 38805  | 216 | 405.71  |
| 1706_C1_PL7775     | KU296422 | 08/06/2015 | blood       | not_stated    | 18386 | 9260   | 211 | 96.20   |
| 1706_C1_PL7792     | KU296793 | 09/06/2015 | blood       | Port_Loko     | 18881 | 112604 | 217 | 1174.88 |
| 1706_C1_PL7801     | KU296327 | 09/06/2015 | blood       | Port_Loko     | 18398 | 52135  | 214 | 549.74  |
| 1706_C1_PL7820     | KU296804 | 09/06/2015 | blood       | Port_Loko     | 18880 | 28798  | 215 | 297.44  |
| 1708_C1_12634_EMLH | KU296653 | 24/03/2015 | blood       | Western_Urban | 18884 | 29216  | 216 | 303.24  |
| 1708_C1_12705_EMLH | KU296490 | 29/03/2015 | blood       | Western_Urban | 18872 | 22695  | 214 | 233.30  |
| 1708_C1_13031_EMLH | KU296665 | 18/05/2015 | blood       | Western_Urban | 18818 | 90669  | 217 | 949.19  |
| 1708_C1_MK0367R    | KU296770 | 21/12/2014 | blood       | Bombali       | 18885 | 10825  | 217 | 112.92  |
| 1708_C1_MK0369R    | KU296413 | 21/12/2014 | blood       | Bombali       | 18874 | 99774  | 216 | 1036.12 |
| 1708_C1_MK0375R    | KU296606 | 22/12/2014 | blood       | Bombali       | 18885 | 154952 | 215 | 1599.98 |
| 1708_C1_MK0379R    | KU296480 | 22/12/2014 | swab        | Bombali       | 18874 | 61776  | 214 | 634.97  |
| 1708_C1_MK0384R    | KU296628 | 22/12/2014 | blood       | Bombali       | 17598 | 220218 | 218 | 2477.73 |
| 1708_C1_MK0388R    | KU296630 | 22/12/2014 | blood       | Bombali       | 18872 | 31740  | 217 | 331.33  |
| 1708_C1_MK0425R    | KU296379 | 23/12/2014 | blood       | Bombali       | 18893 | 260332 | 220 | 2755.86 |
| 1708_C1_MK0431R    | KU296621 | 23/12/2014 | blood       | Bombali       | 18872 | 37860  | 217 | 395.21  |
| 1708_C1_MK0491R    | KU296510 | 23/12/2014 | blood       | Bombali       | 18885 | 13232  | 217 | 138.03  |
| 1708_C1_MK0531R    | KU296448 | 26/12/2014 | swab        | Bombali       | 18894 | 70883  | 217 | 739.07  |
| 1708_C1_MK0533R    | KU296436 | 26/12/2014 | blood       | not_stated    | 18862 | 4300   | 217 | 44.91   |
| 1708_C1_MK0592R    | KU296814 | 28/12/2014 | blood       | Bombali       | 18872 | 32599  | 218 | 342.02  |
| 1708_C1_MK0704R    | KU296663 | 31/12/2014 | blood       | Bombali       | 18873 | 11864  | 217 | 123.84  |
| 1708_C1_MK0723R    | KU296610 | 01/01/2015 | blood       | Bombali       | 18879 | 123796 | 214 | 1272.13 |
| 1708_C1_MK0766R    | KU296777 | 02/01/2015 | blood       | not_stated    | 18881 | 11913  | 217 | 124.30  |
| 1708_C1_MK0849R    | KU296323 | 05/01/2015 | blood       | not_stated    | 18873 | 178153 | 221 | 1897.34 |
| 1708_C2_MK1036R    | KU296834 | 11/01/2015 | blood       | Bombali       | 18548 | 57376  | 214 | 600.12  |
| 1708_C2_MK1156R    | KU296605 | 15/01/2015 | blood       | Bombali       | 18800 | 104526 | 212 | 1067.50 |
| 1708_C2_MK2008R2   | KU296526 | 12/02/2015 | swab        | Western_Urban | 18734 | 96924  | 191 | 884.70  |
| 1708_C2_MK2282R    | KU296788 | 22/02/2015 | blood       | Bombali       | 18871 | 33352  | 216 | 346.40  |
| 1708_C2_MK2283R    | KU296833 | 22/02/2015 | blood       | Bombali       | 18547 | 111855 | 216 | 1182.05 |
| 1708_C2_MK2307R    | KU296536 | 23/02/2015 | blood       | not_stated    | 18746 | 12178  | 216 | 127.33  |
| 1708_C2_MK2506R    | KU296360 | 27/02/2015 | blood       | Bombali       | 18871 | 68738  | 214 | 706.65  |
| 1708_C2_MK2656R2   | KU296577 | 03/03/2015 | swab        | Koinadugu     | 18746 | 18882  | 214 | 195.41  |
| 1708_C2_MK2717R    | KU296425 | 04/03/2015 | swab        | Bombali       | 18870 | 61275  | 215 | 633.21  |
| 1708_C2_MK2900R2   | KU296787 | 10/03/2015 | blood       | Bombali       | 18745 | 13186  | 214 | 136.47  |
| 1804_C1_MK2570     | KU296346 | 01/03/2015 | blood       | not_stated    | 18834 | 89425  | 212 | 911.63  |
| 1805_C1_MK2255     | KU296648 | 21/02/2015 | blood       | not_stated    | 18749 | 69404  | 210 | 703.33  |
| 1805_C1_MK2341     | KU296494 | 24/02/2015 | blood       | not_stated    | 18867 | 67496  | 200 | 643.94  |
| 1805_C1_MK2382     | KU296686 | 25/02/2015 | blood       | Bombali       | 18883 | 14204  | 209 | 142.17  |
| 1805_C1_MK2395     | KU296336 | 25/02/2015 | blood       | not_stated    | 18746 | 29296  | 206 | 290.68  |
| 1805_C1_MK2397     | KU296444 | 25/02/2015 | blood       | not_stated    | 18749 | 83619  | 200 | 802.79  |
| 1805_C1_MK2398     | KU296578 | 25/02/2015 | blood       | not_stated    | 18870 | 33167  | 207 | 328.68  |
| 1805_C1_MK2710     | KU296703 | 05/03/2015 | blood       | not_stated    | 18725 | 59968  | 202 | 582.86  |
| 1805_C1_MK2724     | KU296695 | 05/03/2015 | blood       | Bombali       | 18875 | 43985  | 211 | 445.09  |
| 1805_C1_MK2788     | KU296573 | 07/03/2015 | blood       | Bombali       | 18869 | 33073  | 213 | 338.28  |
| 1805_C1_MK2825     | KU296402 | 08/03/2015 | blood       | Bombali       | 18885 | 92824  | 213 | 948.64  |
| 1805_C1_MK3043     | KU296474 | 14/03/2015 | blood       | not_stated    | 18875 | 75509  | 215 | 780.09  |
| 1805_C1_MK3462     | KU296565 | 26/03/2015 | blood       | Bombali       | 18860 | 20482  | 212 | 208.51  |
| 1805_C1_MK3479     | KU296483 | 26/03/2015 | blood       | Bombali       | 18862 | 17790  | 214 | 182.97  |
| 1807_C1_14859_EMLK | KU296438 | 30/04/2015 | non_stated  | Kambia        | 18894 | 12313  | 217 | 128.38  |
| 1807_C1_14888_EMLK | KU296423 | 03/05/2015 | non_stated  | Kambia        | 18872 | 32473  | 204 | 316.61  |
| 1807_C1_15000_EMLK | KU296504 | 13/05/2015 | non_stated  | Kambia        | 18399 | 40160  | 207 | 408.17  |
| 1807_C1_15274_EMLK | KU296337 | 04/06/2015 | non_stated  | Kambia        | 18376 | 35359  | 186 | 319.42  |
| 1807_C1_15314_EMLK | KU296600 | 06/06/2015 | non_stated  | Kambia        | 18747 | 60531  | 220 | 645.77  |
| 1807_C1_15323_EMLK | KU296668 | 07/06/2015 | non_stated  | Kambia        | 18883 | 19236  | 218 | 201.70  |
| 1807_C1_15327_EMLK | KU296649 | 07/06/2015 | non_stated  | Kambia        | 18868 | 24151  | 219 | 254.72  |
| 1807_C1_15338_EMLK | KU296414 | 08/06/2015 | non_stated  | Kambia        | 18883 | 117571 | 220 | 1245.26 |
| 1807_C1_15349_EMLK | KU296442 | 09/06/2015 | non_stated  | Kambia        | 18869 | 42555  | 217 | 444.29  |
| 1807_C1_15360_EMLK | KU296399 | 08/06/2015 | non_stated  | Kambia        | 18884 | 29492  | 218 | 309.23  |
| 1807_C1_15373_EMLK | KU296802 | 10/06/2015 | non_stated  | Kambia        | 18747 | 31270  | 216 | 326.93  |
| 1807_C1_15421_EMLK | KU296796 | 13/06/2015 | non_stated  | Kambia        | 18768 | 16112  | 211 | 163.97  |
| 1807_C1_15470_EMLK | KU296543 | 16/06/2015 | non_stated  | Kambia        | 18870 | 37860  | 201 | 363.15  |
| 1807_C1_77724_EMLK | KU296656 | 10/01/2015 | blood       | Western_Urban | 18736 | 21227  | 179 | 180.14  |
| 1807_C1_MK0464     | KU296835 | 24/12/2014 | blood       | not_stated    | 18874 | 46325  | 199 | 439.35  |
| 1807_C1_MK0551     | KU296717 | 27/12/2014 | blood       | not_stated    | 18886 | 114834 | 191 | 1039.75 |
| 1807_C1_PL8310     | KU296618 | 21/06/2015 | blood       | Port_Loko     | 18873 | 175327 | 220 | 1857.97 |
| 1807_C1_PL8780     | KU296404 | 03/07/2015 | blood       | Port_Loko     | 18387 | 203017 | 221 | 2219.30 |
| 1807_C1_PL8896     | KU296342 | 06/07/2015 | blood       | Port_Loko     | 18262 | 26416  | 220 | 289.30  |
| 1807_C1_PL9150R    | KU296522 | 12/07/2015 | swab        | Port_Loko     | 18885 | 214514 | 220 | 2271.79 |
| 1807_C1_PL9192R    | KU296401 | 13/07/2015 | breast_milk | Port_Loko     | 18262 | 20205  | 218 | 219.07  |
| 1807_C1_PL9199R    | KU296371 | 13/07/2015 | blood       | Port_Loko     | 18540 | 254575 | 213 | 2650.11 |
| 1807_C2_10354_EMLK | KU296314 | 08/02/2015 | blood       | not_stated    | 18764 | 59162  | 207 | 589.60  |
| 1807_C2_10356_EMLK | KU296441 | 08/02/2015 | blood       | not_stated    | 18871 | 32589  | 215 | 336.75  |
| 1807_C2_10394_EMLK | KU296576 | 09/02/2015 | blood       | Western_Urban | 18892 | 23391  | 217 | 243.92  |
| 1807_C2_10398_EMLK | KU296473 | 10/02/2015 | blood       | Western_Urban | 18875 | 65307  | 214 | 671.23  |
| 1807_C2_10402_EMLK | KU296635 | 10/02/2015 | blood       | Western_Urban | 18872 | 44576  | 214 | 458.23  |
| 1807_C2_10415_EMLK | KU296741 | 10/02/2015 | swab        | Western_Urban | 18757 | 41995  | 211 | 427.63  |
| 1807_C2_10454_EMLK | KU296679 | 12/02/2015 | blood       | Western_Urban | 18530 | 47562  | 186 | 426.08  |
| 1807_C2_10455_EMLK | KU296388 | 12/02/2015 | blood       | Western_Urban | 18884 | 59592  | 211 | 602.74  |
| 1807_C2_14521_EMLK | KU296755 | 13/02/2015 | non_stated  | Western_Urban | 18885 | 121717 | 210 | 1224.58 |
| 1807_C2_14549_EMLK | KU296594 | 15/02/2015 | blood       | Western_Urban | 18749 | 85334  | 197 | 805.59  |
| 1807_C2_14687_EMLK | KU296443 | 21/02/2015 | swab        | Western_Urban | 18884 | 39378  | 214 | 404.54  |
| 1807_C2_14723_EMLK | KU296541 | 18/04/2015 | blood       | Kambia        | 18872 | 65742  | 214 | 675.82  |
| 1807_C2_14749_EMLK | KU296763 | 19/04/2015 | blood       | Kambia        | 18485 | 42318  | 183 | 373.16  |
| 1807_C2_14763_EMLK | KU296518 | 21/04/2015 | swab        | Kambia        | 18882 | 59921  | 218 | 628.34  |
| 1807_C2_14776_EMLK | KU296450 | 23/04/2015 | swab        | Kambia        | 18882 | 35453  | 218 | 371.77  |
| 1807_C2_14782_EMLK | KU296639 | 23/04/2015 | swab        | Kambia        | 18883 | 71076  | 217 | 741.51  |

# SM Table 1 Page 4 Metadata 554

|                     |          |            |            |               |       |        |     |         |
|---------------------|----------|------------|------------|---------------|-------|--------|-----|---------|
| 1807_C2_14795_EMLK  | KU296737 | 25/04/2015 | swab       | Kambia        | 18878 | 45951  | 214 | 472.22  |
| 1807_C2_14830_EMLK  | KU296345 | 27/04/2015 | swab       | Kambia        | 18892 | 113507 | 210 | 1141.55 |
| 1807_C2_14846_EMLK  | KU296831 | 29/04/2015 | blood      | Kambia        | 18881 | 31174  | 217 | 325.26  |
| 2005_C2_PL6656      | KU296523 | 01/05/2015 | swab       | Port_Loko     | 18836 | 25184  | 213 | 258.04  |
| 2005_C2_PL7053      | KU296757 | 15/05/2015 | blood      | Port_Loko     | 18278 | 19300  | 209 | 199.57  |
| 2005_C2_PL7055      | KU296484 | 15/05/2015 | swab       | Port_Loko     | 18388 | 9174   | 210 | 94.79   |
| 2104_C1_MK2342      | KU296347 | 24/02/2015 | blood      | not_stated    | 18254 | 424106 | 210 | 4414.37 |
| 2104_C1_MK2343      | KU296640 | 24/02/2015 | blood      | not_stated    | 18887 | 208619 | 201 | 1999.26 |
| 2104_C1_MK2344      | KU296586 | 24/02/2015 | blood      | not_stated    | 18885 | 361683 | 203 | 3504.78 |
| 2104_C1_MK2362      | KU296842 | 24/02/2015 | blood      | not_stated    | 18907 | 158349 | 201 | 1515.90 |
| 2104_C1_MK2364      | KU296719 | 24/02/2015 | blood      | not_stated    | 18873 | 123033 | 211 | 1245.12 |
| 2104_C1_MK2365      | KU296363 | 25/02/2015 | blood      | not_stated    | 18549 | 242854 | 203 | 2395.93 |
| 2104_C1_MK2367      | KU296652 | 25/02/2015 | blood      | not_stated    | 18886 | 159513 | 211 | 1613.20 |
| 2104_C1_MK2437      | KU296469 | 26/02/2015 | blood      | not_stated    | 18877 | 180550 | 208 | 1798.13 |
| 2104_C1_MK2449      | KU296466 | 26/02/2015 | swab       | not_stated    | 18886 | 87730  | 215 | 905.82  |
| 2104_C2_MK2366      | KU296810 | 25/02/2015 | blood      | not_stated    | 18751 | 89008  | 203 | 868.68  |
| 2104_C2_MK2447      | KU296642 | 26/02/2015 | swab       | not_stated    | 18815 | 272561 | 205 | 2679.97 |
| 2104_C2_MK2448      | KU296818 | 26/02/2015 | blood      | not_stated    | 18882 | 163302 | 205 | 1599.98 |
| 2104_C2_MK2850R     | KU296374 | 09/03/2015 | blood      | Bombali       | 18747 | 48947  | 205 | 483.02  |
| 2104_C2_MK2938      | KU296771 | 11/03/2015 | blood      | Bombali       | 18872 | 96797  | 206 | 954.02  |
| 2104_C2_MK2983      | KU296393 | 12/03/2015 | blood      | Bombali       | 18861 | 101705 | 202 | 981.41  |
| 2104_C2_MK3050      | KU296445 | 14/03/2015 | blood      | Koinadugu     | 18861 | 46305  | 211 | 468.92  |
| 2104_C2_MK4165      | KU296575 | 16/04/2015 | swab       | Koinadugu     | 18884 | 199386 | 203 | 1932.20 |
| 2208_C1_MK0433R2    | KU296845 | 23/12/2014 | blood      | Bombali       | 18746 | 5862   | 217 | 61.60   |
| 2208_C1_MK0434R2    | KU296554 | 23/12/2014 | blood      | Bombali       | 18872 | 10750  | 216 | 111.65  |
| 2208_C1_MK0549R2    | KU296825 | 27/12/2014 | blood      | Bombali       | 18735 | 5066   | 216 | 53.00   |
| 2208_C1_MK2789R3    | KU296613 | 07/03/2015 | blood      | Bombali       | 18746 | 20082  | 217 | 211.04  |
| 2208_C1_MK2918R     | KU296300 | 10/03/2015 | swab       | Koinadugu     | 18871 | 121526 | 218 | 1275.09 |
| 2208_C1_MK3183R2    | KU296800 | 17/03/2015 | swab       | Bombali       | 18882 | 99224  | 216 | 1029.97 |
| 2208_C1_PL4127R     | KU296529 | 28/02/2015 | blood      | Port_Loko     | 18746 | 51989  | 216 | 543.57  |
| 2208_C1_PL4169R     | KU296828 | 01/03/2015 | blood      | Port_Loko     | 18870 | 39569  | 216 | 411.00  |
| 2208_C1_PL4197R     | KU296299 | 02/03/2015 | blood      | Port_Loko     | 18881 | 53656  | 218 | 562.67  |
| 2208_C1_PL4203R     | KU296311 | 02/03/2015 | blood      | Port_Loko     | 18749 | 31958  | 216 | 334.09  |
| 2208_C1_PL4256R     | KU296509 | 03/03/2015 | blood      | Port_Loko     | 18748 | 159478 | 212 | 1633.23 |
| 2208_C1_PL4284R     | KU296829 | 03/03/2015 | blood      | Port_Loko     | 18869 | 23480  | 217 | 245.14  |
| 2208_C1_PL4292R     | KU296827 | 03/03/2015 | swab       | Kambia        | 18223 | 95503  | 215 | 1021.96 |
| 2208_C1_PL4432R     | KU296481 | 07/03/2015 | swab       | Kambia        | 18882 | 23991  | 216 | 249.03  |
| 2208_C1_PL4736R     | KU296724 | 13/03/2015 | swab       | Kambia        | 18747 | 30185  | 216 | 315.58  |
| 2208_C2_12615_EMLH  | KU296521 | 22.03.2015 | blood      | Western_Rural | 18882 | 40091  | 215 | 414.03  |
| 2208_C2_15207R_EMLK | KU296488 | 29/05/2015 | non_stated | Kambia        | 18746 | 20083  | 214 | 207.84  |
| 2208_C2_15438R_EMLK | KU296353 | 14/06/2015 | non_stated | Kambia        | 18881 | 33771  | 217 | 352.36  |
| 2208_C2_18638R_EMLH | KU296348 | 08/07/2015 | blood      | Western_Urban | 18746 | 33986  | 214 | 351.72  |
| 2208_C2_18642R_EMLH | KU296357 | 08/07/2015 | blood      | Western_Urban | 18882 | 76420  | 214 | 785.16  |
| 2208_C2_18659R_EMLH | KU296585 | 10/07/2015 | blood      | Western_Urban | 18866 | 32495  | 216 | 337.59  |
| 2208_C2_18687R_EMLH | KU296650 | 12/07/2015 | blood      | Western_Urban | 18872 | 40702  | 217 | 424.88  |
| 2208_C2_19560R_EMLK | KU296580 | 07/07/2015 | non_stated | Kambia        | 18881 | 56393  | 216 | 585.40  |
| 2208_C2_356_EMLH    | KU296546 | 21/01/2015 | blood      | not_stated    | 18882 | 8370   | 216 | 86.88   |
| 2208_C2_651_EMLH    | KU296457 | 07/02/2015 | blood      | not_stated    | 18870 | 22964  | 217 | 239.74  |
| 2208_C2_75711_EMLH  | KU296596 | 15/01/2015 | blood      | Western_Urban | 18870 | 34856  | 216 | 362.04  |
| 2208_C2_75722_EMLH  | KU296791 | 15/01/2015 | blood      | Western_Rural | 18881 | 116709 | 217 | 1217.71 |
| 2208_C2_75731_EMLH  | KU296564 | 16/01/2015 | blood      | Western_Urban | 18882 | 14373  | 216 | 149.20  |
| 2208_C2_75779_EMLH  | KU296407 | 19/01/2015 | blood      | Western_Urban | 18883 | 20804  | 216 | 215.94  |
| 2208_C2_762_EMLH    | KU296728 | 12/02/2015 | blood      | not_stated    | 18871 | 14691  | 216 | 152.59  |
| 2208_C2_PL7483R     | KU296673 | 31/05/2015 | blood      | not_stated    | 18747 | 50373  | 216 | 526.65  |
| 2208_C2_PL7834R2    | KU296326 | 10/06/2015 | blood      | Port_Loko     | 18766 | 22061  | 214 | 228.06  |
| 2507_C1_10012_EMLK  | KU296634 | 18/01/2015 | blood      | Western_Rural | 18803 | 38542  | 210 | 389.46  |
| 2507_C1_10022_EMLK  | KU296482 | 19/01/2015 | blood      | Western_Urban | 18762 | 25005  | 213 | 257.22  |
| 2507_C1_10023_EMLK  | KU296333 | 19/01/2015 | blood      | Western_Urban | 18868 | 293808 | 203 | 2849.63 |
| 2507_C1_10025_EMLK  | KU296470 | 19/01/2015 | blood      | Western_Urban | 18797 | 57837  | 214 | 596.92  |
| 2507_C1_77725_EMLK  | KU296315 | 10/01/2015 | blood      | not_stated    | 18812 | 29183  | 216 | 304.05  |
| 2507_C1_77727_EMLK  | KU296303 | 10/01/2015 | blood      | Western_Urban | 18870 | 63038  | 201 | 604.66  |
| 2507_C1_77737_EMLK  | KU296664 | 11/01/2015 | blood      | Western_Urban | 18886 | 51273  | 215 | 529.40  |
| 2507_C1_77742_EMLK  | KU296378 | 11/01/2015 | blood      | Western_Urban | 18815 | 68107  | 213 | 698.63  |
| 2507_C1_77746_EMLK  | KU296742 | 11/01/2015 | blood      | not_stated    | 18883 | 100404 | 200 | 957.09  |
| 2507_C1_77747_EMLK  | KU296756 | 11/01/2015 | blood      | not_stated    | 18884 | 54568  | 214 | 560.59  |
| 2507_C1_77748_EMLK  | KU296358 | 11/01/2015 | blood      | not_stated    | 18869 | 100265 | 201 | 961.78  |
| 2507_C1_77749_EMLK  | KU296359 | 11/01/2015 | blood      | Western_Urban | 18884 | 30642  | 217 | 319.66  |
| 2507_C1_77750_EMLK  | KU296530 | 12/01/2015 | blood      | Western_Urban | 18885 | 302169 | 214 | 3104.10 |
| 2507_C1_77751_EMLK  | KU296387 | 12/01/2015 | blood      | Western_Urban | 18884 | 258922 | 204 | 2522.87 |
| 2507_C1_77753_EMLK  | KU296582 | 12/01/2015 | blood      | Western_Urban | 18885 | 82821  | 209 | 828.87  |
| 2507_C1_77756_EMLK  | KU296839 | 12/01/2015 | blood      | Western_Urban | 18790 | 106336 | 187 | 945.08  |
| 2507_C1_77767_EMLK  | KU296386 | 14/01/2015 | blood      | not_stated    | 18871 | 25035  | 214 | 257.37  |
| 2507_C1_77768_EMLK  | KU296772 | 14/01/2015 | blood      | not_stated    | 18873 | 17984  | 217 | 187.72  |
| 2507_C1_77795_EMLK  | KU296730 | 16/01/2015 | swab       | Western_Urban | 18873 | 36533  | 213 | 373.59  |
| 2507_C1_MK8878      | KU296684 | 23/07/2015 | non_stated | Tonkolili     | 18748 | 108287 | 203 | 1057.00 |
| 2507_C2_10027_EMLK  | KU296786 | 19/01/2015 | blood      | Western_Urban | 18870 | 28512  | 217 | 297.66  |
| 2507_C2_10038_EMLK  | KU296655 | 20/01/2015 | blood      | Western_Urban | 18870 | 130868 | 208 | 1303.83 |
| 2507_C2_10040_EMLK  | KU296678 | 20/01/2015 | blood      | Western_Urban | 18757 | 61455  | 204 | 602.86  |
| 2507_C2_10049_EMLK  | KU296341 | 21/01/2015 | blood      | not_stated    | 18869 | 25726  | 212 | 261.77  |
| 2507_C2_10065_EMLK  | KU296372 | 22/01/2015 | blood      | Western_Urban | 18755 | 15944  | 216 | 166.62  |
| 2507_C2_10066_EMLK  | KU296637 | 22/01/2015 | blood      | Western_Urban | 18886 | 79335  | 217 | 827.54  |
| 2507_C2_10080_EMLK  | KU296781 | 22/01/2015 | blood      | not_stated    | 18884 | 181966 | 217 | 1898.29 |
| 2507_C2_10082_EMLK  | KU296584 | 22/01/2015 | blood      | not_stated    | 18908 | 35200  | 214 | 361.16  |
| 2507_C2_10084_EMLK  | KU296731 | 22/01/2015 | swab       | not_stated    | 18815 | 15606  | 222 | 167.55  |
| 2507_C2_10112_EMLK  | KU296670 | 24/01/2015 | blood      | Western_Rural | 18878 | 31416  | 216 | 326.18  |
| 2507_C2_10113_EMLK  | KU296611 | 24/01/2015 | blood      | Western_Rural | 18884 | 40614  | 217 | 423.69  |
| 2507_C2_10123_EMLK  | KU296609 | 25/01/2015 | blood      | Western_Urban | 18754 | 29797  | 205 | 293.93  |
| 2507_C2_10132_EMLK  | KU296811 | 25/01/2015 | blood      | Western_Urban | 18883 | 28647  | 217 | 298.86  |
| 2507_C2_10134_EMLK  | KU296409 | 25/01/2015 | blood      | Western_Urban | 18747 | 59223  | 210 | 600.23  |
| 2507_C2_10142_EMLK  | KU296317 | 26/01/2015 | blood      | Western_Urban | 18882 | 11544  | 217 | 120.44  |
| 2507_C2_10212_EMLK  | KU296785 | 31/01/2015 | blood      | Western_Urban | 18871 | 136881 | 217 | 1428.94 |
| 2507_C2_10244_EMLK  | KU296568 | 02/02/2015 | blood      | not_stated    | 18882 | 128996 | 217 | 1345.84 |

# SM Table 1 Page 5 Metadata 554

|                    |          |            |       |               |       |        |       |         |
|--------------------|----------|------------|-------|---------------|-------|--------|-------|---------|
| 2507_C2_10247_EMLK | KU296674 | 02/02/2015 | blood | not_stated    | 18884 | 15489  | 217   | 161.58  |
| 2507_C2_10248_EMLK | KU296669 | 02/02/2015 | blood | Port_Loko     | 18881 | 67000  | 217   | 699.06  |
| 2507_C2_10278_EMLK | KU296499 | 03/02/2015 | blood | Western_Urban | 18882 | 15288  | 217   | 159.50  |
| 2507_C2_10352_EMLK | KU296631 | 08/02/2015 | blood | not_stated    | 18882 | 30592  | 218   | 320.79  |
| 2507_C2_10353_EMLK | KU296751 | 08/02/2015 | blood | Western_Urban | 18883 | 14865  | 217   | 155.08  |
| 2507_C2_77722_EMLK | KU296479 | 10/01/2015 | blood | Western_Urban | 18871 | 59753  | 207   | 592.12  |
| 2507_C2_77723_EMLK | KU296563 | 10/01/2015 | blood | Western_Urban | 18872 | 90391  | 217   | 943.57  |
| 2605_C1_MK0885     | KU296758 | 06/01/2015 | blood | not_stated    | 18816 | 107355 | 178   | 901.47  |
| 2605_C1_MK1197     | KU296301 | 17/01/2015 | blood | not_stated    | 18780 | 212857 | 151   | 1484.78 |
| 2605_C1_MK1202     | KU296581 | 17/01/2015 | blood | Bombali       | 18078 | 108772 | 149   | 776.17  |
| 2605_C1_MK1320     | KU296354 | 20/01/2015 | blood | Bombali       | 18759 | 45053  | 123   | 247.37  |
| 2605_C2_KT5226     | KU296297 | 21/02/2015 | blood | not_stated    | 18875 | 93691  | 203   | 908.37  |
| 2605_C2_KT5233     | KU296750 | 21/02/2015 | blood | not_stated    | 18875 | 75557  | 190   | 680.52  |
| 2605_C2_KT5243     | KU296736 | 22/02/2015 | blood | not_stated    | 18871 | 80491  | 186   | 708.04  |
| 2605_C2_PL5133R    | KU296489 | 21/03/2015 | swab  | Port_Loko     | 18400 | 111631 | 212   | 1164.85 |
| 2605_C2_PL5275     | KU296439 | 24/03/2015 | blood | Port_Loko     | 18881 | 131938 | 202   | 1271.79 |
| 2605_C2_PL5534     | KU296784 | 29/03/2015 | blood | Port_Loko     | 18387 | 84153  | 193   | 791.78  |
| 2605_C2_PL7136b    | KU296732 | 18/05/2015 | blood | Port_Loko     | 18881 | 71481  | 213   | 730.67  |
| 2607_C1_12004_EMLH | KU296302 | 14/02/2015 | swab  | Western_Rural | 18748 | 9220   | 217   | 96.88   |
| 2607_C1_12106_EMLH | KU296780 | 18/02/2015 | blood | Western_Urban | 18887 | 208068 | 219   | 2192.27 |
| 2607_C1_12112_EMLH | KU296647 | 18/02/2015 | blood | Western_Urban | 18870 | 20313  | 217   | 212.06  |
| 2607_C1_12161_EMLH | KU296697 | 21/02/2015 | blood | not_stated    | 18873 | 289104 | 218   | 3033.05 |
| 2607_C1_12178_EMLH | KU296525 | 22/02/2015 | blood | Western_Urban | 18882 | 93078  | 216   | 966.17  |
| 2607_C1_12179_EMLH | KU296531 | 22.02.2015 | blood | Western_Urban | 18884 | 74156  | 217   | 773.60  |
| 2607_C1_592_EMLH   | KU296447 | 05/02/2015 | blood | not_stated    | 18884 | 20768  | 217   | 216.65  |
| 2607_C1_611_EMLH   | KU296619 | 05/02/2015 | blood | not_stated    | 18871 | 29361  | 219   | 309.62  |
| 2607_C1_614_EMLH   | KU296597 | 05/02/2015 | blood | Western_Rural | 18883 | 123243 | 217   | 1285.75 |
| 2607_C1_632_EMLH   | KU296693 | 06/02/2015 | blood | Western_Urban | 18883 | 37959  | 217   | 396.01  |
| 2607_C1_634_EMLH   | KU296799 | 06/02/2015 | blood | Western_Urban | 18883 | 16809  | 218   | 176.25  |
| 2607_C1_704_EMLH   | KU296721 | 09/02/2015 | blood | not_stated    | 18872 | 26237  | 219   | 276.66  |
| 2607_C1_705_EMLH   | KU296683 | 09/02/2015 | blood | not_stated    | 18748 | 54475  | 220   | 581.13  |
| 2607_C1_731_EMLH   | KU296765 | 11/02/2015 | blood | Western_Urban | 18871 | 30577  | 217   | 319.20  |
| 2607_C1_732_EMLH   | KU296391 | 11/02/2015 | blood | not_stated    | 18887 | 39510  | 217   | 412.11  |
| 2607_C1_735_EMLH   | KU296661 | 11/02/2015 | blood | not_stated    | 18885 | 48900  | 217   | 510.10  |
| 2607_C1_741_EMLH   | KU296295 | 11/02/2015 | swab  | Western_Urban | 18883 | 57113  | 218   | 598.86  |
| 2607_C1_793_EMLH   | KU296492 | 13/02/2015 | blood | not_stated    | 18882 | 93084  | 219   | 981.03  |
| 2607_C1_PL4022R    | KU296362 | 26/02/2015 | blood | Port_Loko     | 18748 | 108194 | 210   | 1096.48 |
| 2607_C1_PL4052R    | KU296676 | 26/02/2015 | swab  | Port_Loko     | 18868 | 131596 | 211   | 1332.15 |
| 2607_C1_PL4330R    | KU296624 | 05/03/2015 | blood | Port_Loko     | 18873 | 89226  | 201   | 855.71  |
| 2607_C2_12180_EMLH | KU296310 | 22/02/2015 | blood | Western_Urban | 18885 | 162215 | 217   | 1692.15 |
| 2607_C2_12181_EMLH | KU296783 | 23/02/2015 | blood | Western_Urban | 18798 | 20791  | 201   | 200.19  |
| 2607_C2_12189_EMLH | KU296369 | 23/02/2015 | blood | Western_Urban | 18890 | 82099  | 217   | 856.20  |
| 2607_C2_12192_EMLH | KU296511 | 23/02/2015 | blood | Western_Urban | 18871 | 117290 | 218   | 1230.64 |
| 2607_C2_12193_EMLH | KU296616 | 23/02/2015 | blood | Western_Urban | 18889 | 38197  | 218   | 400.39  |
| 2607_C2_12229_EMLH | KU296643 | 27/02/2015 | blood | Western_Rural | 18888 | 13813  | 217   | 144.07  |
| 2607_C2_12242_EMLH | KU296604 | 28/02/2015 | blood | Western_Urban | 18872 | 147417 | 220   | 1562.28 |
| 2607_C2_12257_EMLH | KU296702 | 01/03/2015 | swab  | Port_Loko     | 18884 | 77737  | 220   | 823.31  |
| 2607_C2_12275_EMLH | KU296538 | 02/03/2015 | blood | Western_Urban | 18884 | 56159  | 216   | 582.88  |
| 2607_C2_12600_EMLH | KU296449 | 21/03/2015 | blood | Western_Urban | 18871 | 31732  | 217   | 331.26  |
| 2607_C2_12628_EMLH | KU296692 | 23/03/2015 | blood | Western_Rural | 18870 | 25005  | 216   | 259.72  |
| 2607_C2_12666_EMLH | KU296803 | 26/03/2015 | blood | Western_Rural | 18885 | 50463  | 214   | 518.39  |
| 2607_C2_12757_EMLH | KU296468 | 03/04/2015 | blood | Western_Urban | 18873 | 41773  | 208   | 416.12  |
| 2607_C2_12767_EMLH | KU296768 | 04/04/2015 | blood | Western_Urban | 18884 | 12957  | 210.5 | 130.71  |
| 2607_C2_12781_EMLH | KU296520 | 06/04/2015 | blood | Western_Urban | 18871 | 104537 | 217   | 1091.29 |
| 2607_C2_12851_EMLH | KU296671 | 15/04/2015 | blood | Western_Urban | 18750 | 30853  | 217   | 324.16  |
| 2607_C2_12854_EMLH | KU296729 | 15/04/2015 | blood | Western_Urban | 18881 | 50465  | 217   | 526.54  |
| 2607_C2_12855_EMLH | KU296723 | 15/04/2015 | blood | Western_Urban | 18882 | 33303  | 217   | 347.46  |
| 2607_C2_12872_EMLH | KU296560 | 18/04/2015 | blood | Western_Urban | 18870 | 34205  | 216   | 355.28  |
| 2607_C2_12916_EMLH | KU296318 | 29/04/2015 | blood | Western_Urban | 18745 | 7756   | 217   | 81.51   |
| 2607_C2_12934_EMLH | KU296790 | 04/05/2015 | blood | Western_Urban | 18869 | 48067  | 217   | 501.84  |
| 2607_C2_12936_EMLH | KU296561 | 04/05/2015 | blood | Western_Urban | 18883 | 179587 | 214   | 1845.04 |
| 2807_C1_361_EMLH   | KU296420 | 21/01/2015 | blood | Western_Urban | 18883 | 57861  | 217   | 603.64  |
| 2807_C1_362_EMLH   | KU296505 | 21/01/2015 | blood | Western_Urban | 18884 | 182599 | 218   | 1914.56 |
| 2807_C1_375_EMLH   | KU296813 | 21/01/2015 | blood | not_stated    | 18871 | 35791  | 218   | 375.53  |
| 2807_C1_380_EMLH   | KU296377 | 22/01/2015 | blood | not_stated    | 18878 | 42547  | 217   | 444.00  |
| 2807_C1_389_EMLH   | KU296593 | 23/01/2015 | blood | Western_Rural | 18884 | 49922  | 214   | 512.86  |
| 2807_C1_402_EMLH   | KU296495 | 23/01/2015 | swab  | Western_Rural | 18884 | 43549  | 216   | 452.00  |
| 2807_C1_405_EMLH   | KU296805 | 24/01/2015 | blood | not_stated    | 18800 | 30573  | 217   | 320.37  |
| 2807_C1_408_EMLH   | KU296408 | 24/01/2015 | blood | not_stated    | 18883 | 271248 | 217   | 2829.83 |
| 2807_C1_413_EMLH   | KU296472 | 24/01/2015 | blood | not_stated    | 18884 | 278943 | 218   | 2924.73 |
| 2807_C1_466_EMLH   | KU296433 | 28/01/2015 | blood | Western_Urban | 18872 | 92556  | 211   | 936.75  |
| 2807_C1_468_EMLH   | KU296773 | 29/01/2015 | blood | not_stated    | 18874 | 121030 | 211   | 1224.79 |
| 2807_C1_470_EMLH   | KU296662 | 29/01/2015 | blood | not_stated    | 18814 | 86023  | 201   | 827.58  |
| 2807_C1_473_EMLH   | KU296524 | 29/01/2015 | blood | not_stated    | 18746 | 41410  | 205   | 408.67  |
| 2807_C1_480_EMLH   | KU296491 | 29/01/2015 | blood | not_stated    | 18871 | 241492 | 216   | 2508.20 |
| 2807_C1_75674_EMLH | KU296350 | 13/01/2015 | blood | Western_Urban | 18872 | 11522  | 217   | 120.28  |
| 2807_C1_75685_EMLH | KU296365 | 14/01/2015 | blood | not_stated    | 18750 | 25734  | 217   | 270.38  |
| 2807_C1_75688_EMLH | KU296672 | 14/01/2015 | blood | Western_Rural | 18861 | 4316   | 215   | 44.62   |
| 2807_C1_75705_EMLH | KU296602 | 15/01/2015 | blood | Western_Urban | 18884 | 53534  | 217   | 558.47  |
| 2807_C1_75707_EMLH | KU296344 | 15/01/2015 | blood | Western_Rural | 18872 | 25576  | 215   | 264.27  |
| 2807_C1_75727_EMLH | KU296716 | 16/01/2015 | blood | Western_Urban | 18884 | 56356  | 218   | 590.90  |
| 2807_C1_75728_EMLH | KU296331 | 16/01/2015 | blood | Western_Urban | 18873 | 65706  | 217   | 685.85  |
| 2807_C1_75750_EMLH | KU296464 | 17/01/2015 | blood | Western_Urban | 18884 | 217384 | 217   | 2267.77 |
| 2807_C1_75789_EMLH | KU296382 | 20/01/2015 | blood | not_stated    | 18874 | 27099  | 217   | 282.85  |
| 2807_C2_489_EMLH   | KU296324 | 30/01/2015 | blood | Western_Rural | 18856 | 71758  | 217   | 749.70  |
| 2807_C2_490_EMLH   | KU296746 | 30/01/2015 | swab  | not_stated    | 18882 | 36685  | 217   | 382.74  |
| 2807_C2_491_EMLH   | KU296588 | 30/01/2015 | blood | not_stated    | 18870 | 50820  | 217   | 530.55  |
| 2807_C2_505_EMLH   | KU296659 | 31/01/2015 | blood | Western_Urban | 18882 | 51761  | 217   | 540.03  |
| 2807_C2_508_EMLH   | KU296304 | 31/01/2015 | blood | Western_Urban | 18870 | 23252  | 217   | 242.75  |
| 2807_C2_511_EMLH   | KU296646 | 01/02/2015 | blood | Western_Urban | 18870 | 36150  | 216   | 375.48  |
| 2807_C2_518_EMLH   | KU296747 | 02/02/2015 | blood | not_stated    | 18882 | 38915  | 217   | 406.01  |
| 2807_C2_539_EMLH   | KU296823 | 02/02/2015 | blood | Western_Urban | 18881 | 72907  | 216   | 756.83  |
| 2807_C2_554_EMLH   | KU296817 | 03/02/2015 | swab  | not_stated    | 18882 | 23787  | 216   | 246.91  |
| 2807_C2_567_EMLH   | KU296427 | 03/02/2015 | blood | not_stated    | 18748 | 35353  | 210   | 358.28  |
| 2807_C2_77685_EMLK | KU296364 | 08/01/2015 | swab  | Western_Urban | 18874 | 60597  | 202   | 584.33  |

# SM Table 1 Page 6 Metadata 554

|                    |          |            |            |               |       |        |     |         |
|--------------------|----------|------------|------------|---------------|-------|--------|-----|---------|
| 2807_C2_77687_EMLK | KU296296 | 09/01/2015 | blood      | Western_Urban | 18518 | 132178 | 174 | 1099.22 |
| 2807_C2_77688_EMLK | KU296328 | 09/01/2015 | blood      | Western_Urban | 18872 | 88806  | 206 | 875.26  |
| 2807_C2_77693_EMLK | KU296381 | 09/01/2015 | blood      | Western_Urban | 18871 | 128522 | 217 | 1341.68 |
| 2807_C2_77696_EMLK | KU296767 | 09/01/2015 | blood      | Western_Urban | 18883 | 24221  | 217 | 252.69  |
| 2807_C2_77706_EMLK | KU296572 | 10/01/2015 | blood      | Western_Urban | 18884 | 93367  | 217 | 974.01  |
| 2807_C2_77710_EMLK | KU296696 | 10/01/2015 | blood      | Western_Urban | 18869 | 36985  | 217 | 386.14  |
| 2807_C2_77711_EMLK | KU296644 | 10/01/2015 | blood      | Western_Urban | 18869 | 23799  | 214 | 244.69  |
| 2807_C2_77712_EMLK | KU296400 | 10/01/2015 | blood      | Western_Urban | 18869 | 36477  | 214 | 375.04  |
| 2807_C2_77716_EMLK | KU296569 | 10/01/2015 | blood      | Western_Urban | 18747 | 60471  | 211 | 616.10  |
| 2807_C2_MK1355R    | KU296515 | 22/01/2015 | blood      | Bombali       | 18800 | 105068 | 125 | 586.82  |
| 2906_C1_PL4194     | KU296501 | 02/03/2015 | swab       | Port_Loko     | 18871 | 59189  | 193 | 542.62  |
| 2906_C1_PL4347     | KU296720 | 04/03/2015 | swab       | Kambia        | 18871 | 101626 | 201 | 974.74  |
| 2906_C1_PL4483     | KU296389 | 08/03/2015 | swab       | Kambia        | 18748 | 41413  | 184 | 362.27  |
| 2906_C1_PL4561     | KU296725 | 10/03/2015 | swab       | Port_Loko     | 18874 | 57546  | 189 | 515.28  |
| 2906_C1_PL4569     | KU296598 | 10/03/2015 | blood      | Port_Loko     | 18748 | 38469  | 191 | 350.88  |
| 2906_C1_PL4872     | KU296419 | 16/03/2015 | swab       | Kambia        | 18887 | 77941  | 201 | 746.93  |
| 2906_C1_PL4886     | KU296461 | 16/03/2015 | blood      | Port_Loko     | 18885 | 138401 | 205 | 1355.80 |
| 2906_C1_PL5001     | KU296514 | 19/03/2015 | swab       | Port_Loko     | 18881 | 124671 | 201 | 1195.14 |
| 2906_C1_PL5019     | KU296627 | 19/03/2015 | blood      | Port_Loko     | 18870 | 42397  | 205 | 415.66  |
| 2906_C1_PL5099     | KU296682 | 19/03/2015 | swab       | Port_Loko     | 18871 | 24856  | 214 | 255.53  |
| 2906_C1_PL5157     | KU296421 | 22/03/2015 | blood      | Port_Loko     | 18870 | 107835 | 201 | 1034.35 |
| 2906_C1_PL7689     | KU296712 | 06/06/2015 | blood      | Port_Loko     | 18871 | 29259  | 211 | 296.14  |
| 2906_C1_PL7946     | KU296667 | 12/06/2015 | swab       | Port_Loko     | 18813 | 16623  | 212 | 169.65  |
| 2906_C1_PL7947     | KU296571 | 12/06/2015 | swab       | Port_Loko     | 18748 | 43906  | 186 | 388.76  |
| 2906_C1_PL8128     | KU296340 | 16/06/2015 | swab       | Port_Loko     | 18872 | 63080  | 183 | 544.83  |
| 2906_C1_PL8172     | KU296428 | 18/06/2015 | blood      | Port_Loko     | 18884 | 165065 | 202 | 1590.87 |
| 2906_C2_KT5034     | KU296632 | 14/02/2015 | blood      | Western_Urban | 18872 | 31569  | 201 | 302.78  |
| 2906_C2_KT5786     | KU296590 | 07/03/2015 | blood      | Western_Urban | 18747 | 31299  | 209 | 315.55  |
| 2906_C2_MK0364     | KU296453 | 21/12/2014 | blood      | Bombali       | 18748 | 19556  | 204 | 191.93  |
| 2906_C2_MK0365     | KU296406 | 21/12/2014 | blood      | Bombali       | 18776 | 39645  | 190 | 358.95  |
| 2906_C2_MK0366     | KU296320 | 21/12/2014 | blood      | Bombali       | 18884 | 30778  | 215 | 317.82  |
| 2906_C2_MK0368     | KU296718 | 21/12/2014 | blood      | Bombali       | 18769 | 50024  | 200 | 479.75  |
| 3004_C1_KT5734     | KU296595 | 06/03/2015 | blood      | Western_Rural | 18864 | 119066 | 210 | 1199.25 |
| 3004_C1_KT5738     | KU296394 | 06/03/2015 | blood      | not_stated    | 18874 | 154522 | 209 | 1547.36 |
| 3004_C1_KT5787     | KU296711 | 07/03/2015 | blood      | Western_Urban | 17573 | 183838 | 215 | 2039.97 |
| 3004_C1_KT5788     | KU296704 | 07/03/2015 | blood      | Western_Urban | 18248 | 144856 | 214 | 1540.01 |
| 3004_C1_KT5789     | KU296713 | 07/03/2015 | blood      | Western_Urban | 18886 | 43128  | 212 | 438.45  |
| 3004_C1_KT5832     | KU296493 | 10/03/2015 | blood      | not_stated    | 18871 | 50781  | 214 | 522.05  |
| 3004_C1_KT5858     | KU296754 | 10/03/2015 | blood      | Western_Rural | 18883 | 60541  | 212 | 615.57  |
| 3004_C1_KT5859     | KU296463 | 10/03/2015 | blood      | not_stated    | 18505 | 135097 | 181 | 1175.39 |
| 3004_C1_KT5974     | KU296475 | 16/03/2015 | blood      | not_stated    | 18871 | 143285 | 213 | 1465.43 |
| 3004_C2_KT5214     | KU296338 | 20/02/2015 | blood      | not_stated    | 18881 | 101915 | 215 | 1052.56 |
| 3004_C2_KT5224     | KU296383 | 21/02/2015 | blood      | not_stated    | 18871 | 99882  | 203 | 968.60  |
| 3004_C2_KT5225     | KU296517 | 21/02/2015 | blood      | not_stated    | 18734 | 137542 | 204 | 1350.90 |
| 3004_C2_KT5249     | KU296601 | 22/02/2015 | blood      | Western_Urban | 18875 | 150447 | 201 | 1442.69 |
| 3004_C2_KT5317     | KU296352 | 24/02/2015 | blood      | Western_Rural | 18836 | 137888 | 210 | 1390.88 |
| 3004_C2_KT5320     | KU296809 | 24/02/2015 | not_stated | Western_Rural | 18871 | 84061  | 206 | 828.54  |
| 3004_C2_KT5382     | KU296657 | 25/02/2015 | swab       | Western_Rural | 18828 | 63080  | 209 | 633.21  |
| 3004_C2_KT5388     | KU296355 | 25/02/2015 | swab       | Western_Rural | 18870 | 110727 | 204 | 1079.70 |
| 3004_C2_KT5486     | KU296680 | 27/02/2015 | blood      | not_stated    | 18876 | 122763 | 212 | 1248.70 |
| 3004_C2_KT5542     | KU296557 | 20/02/2015 | blood      | not_stated    | 18869 | 201668 | 209 | 2019.99 |
| 3007_C1_12578_EMLH | KU296307 | 20/03/2015 | blood      | Western_Rural | 18747 | 107091 | 219 | 1136.78 |
| 3007_C1_12579_EMLH | KU296548 | 20/03/2015 | blood      | Western_Rural | 18871 | 63515  | 217 | 663.05  |
| 3007_C1_12580_EMLH | KU296574 | 20/03/2015 | blood      | Western_Rural | 18872 | 27499  | 216 | 285.60  |
| 3007_C1_13247_EMLH | KU296830 | 19/06/2015 | blood      | not_stated    | 18869 | 96676  | 215 | 999.09  |
| 3007_C1_442_EMLH   | KU296375 | 26/01/2015 | blood      | Western_Urban | 18392 | 24290  | 217 | 260.18  |
| 3007_C1_443_EMLH   | KU296539 | 26/01/2015 | blood      | Western_Urban | 18748 | 56502  | 219 | 599.74  |
| 3007_C1_448_EMLH   | KU296797 | 27/01/2015 | blood      | Western_Urban | 18750 | 28614  | 218 | 302.16  |
| 3007_C1_75708_EMLH | KU296739 | 15/01/2015 | blood      | Western_Rural | 18882 | 15838  | 217 | 165.24  |
| 3007_C1_77524_EMLK | KU296368 | 30/12/2014 | blood      | Western_Urban | 17830 | 15261  | 216 | 167.76  |
| 3007_C1_77525_EMLK | KU296820 | 30/12/2014 | blood      | Western_Urban | 18871 | 238750 | 201 | 2289.95 |
| 3007_C1_77526_EMLK | KU296824 | 30/12/2014 | blood      | Western_Urban | 18869 | 94722  | 186 | 833.31  |
| 3007_C1_77529_EMLK | KU296477 | 30/12/2014 | blood      | Western_Urban | 18871 | 106284 | 196 | 991.25  |
| 3007_C1_77549_EMLK | KU296293 | 01/01/2015 | blood      | Western_Urban | 18763 | 6475   | 217 | 67.98   |
| 3007_C1_77551_EMLK | KU296808 | 01/01/2015 | blood      | Western_Urban | 18406 | 22084  | 217 | 236.37  |
| 3007_C1_77558_EMLK | KU296733 | 02/01/2015 | swab       | Western_Urban | 18868 | 33057  | 214 | 339.89  |
| 3007_C1_77563_EMLK | KU296432 | 02/01/2015 | blood      | Western_Urban | 18884 | 56692  | 214 | 582.41  |
| 3007_C1_77572_EMLK | KU296508 | 03/01/2015 | blood      | Western_Urban | 18832 | 18936  | 214 | 195.07  |
| 3007_C1_KT7095     | KU296690 | 05/07/2015 | blood      | Kambia        | 18878 | 28632  | 218 | 300.31  |
| 3007_C1_MK9396     | KU296321 | 18/07/2015 | non_stated | not_stated    | 18869 | 112577 | 209 | 1127.62 |
| 3007_C2_77573_EMLK | KU296516 | 03/01/2015 | non_stated | Western_Urban | 18869 | 131430 | 216 | 1365.22 |
| 3007_C2_77574_EMLK | KU296700 | 03/01/2015 | non_stated | Western_Rural | 18831 | 22440  | 215 | 232.37  |
| 3007_C2_77577_EMLK | KU296533 | 03/01/2015 | non_stated | Western_Urban | 18739 | 6133   | 216 | 64.15   |
| 3007_C2_77578_EMLK | KU296806 | 03/01/2015 | non_stated | Western_Urban | 18819 | 14234  | 212 | 145.22  |
| 3007_C2_77580_EMLK | KU296431 | 03/01/2015 | non_stated | Western_Urban | 18746 | 11853  | 209 | 119.50  |
| 3007_C2_77581_EMLK | KU296540 | 03/01/2015 | non_stated | Western_Urban | 18754 | 22727  | 206 | 225.40  |
| 3007_C2_77582_EMLK | KU296816 | 03/01/2015 | non_stated | Western_Urban | 18746 | 177432 | 203 | 1732.11 |
| 3007_C2_77585_EMLK | KU296734 | 04/01/2015 | non_stated | Western_Urban | 18869 | 12676  | 211 | 128.31  |
| 3007_C2_77588_EMLK | KU296801 | 04/01/2015 | non_stated | Western_Urban | 18883 | 18966  | 216 | 196.86  |
| 3007_C2_77589_EMLK | KU296403 | 04/01/2015 | non_stated | Western_Urban | 18822 | 55913  | 204 | 546.60  |
| 3007_C2_77591_EMLK | KU296836 | 04/01/2015 | non_stated | Western_Urban | 18874 | 41484  | 210 | 417.61  |
| 3007_C2_77594_EMLK | KU296343 | 04/01/2015 | non_stated | Western_Urban | 18759 | 134567 | 190 | 1219.49 |
| 3007_C2_77601_EMLK | KU296826 | 05/01/2015 | non_stated | Western_Urban | 18882 | 30639  | 211 | 309.93  |
| 3007_C2_77612_EMLK | KU296636 | 05/01/2015 | non_stated | Western_Urban | 18748 | 66965  | 201 | 646.51  |
| 3007_C2_77613_EMLK | KU296579 | 05/01/2015 | non_stated | Western_Urban | 18748 | 29948  | 217 | 314.69  |
| 3007_C2_77615_EMLK | KU296706 | 05/01/2015 | non_stated | Western_Urban | 18746 | 39254  | 217 | 412.52  |
| 3007_C2_77630_EMLK | KU296779 | 06/01/2015 | non_stated | Western_Urban | 18746 | 13317  | 216 | 139.24  |
| 3007_C2_77632_EMLK | KU296710 | 06/01/2015 | non_stated | Western_Urban | 18883 | 14991  | 215 | 154.81  |
| 3007_C2_77643_EMLK | KU296395 | 07/01/2015 | non_stated | Western_Urban | 18768 | 24924  | 188 | 223.11  |
| 3007_C2_77644_EMLK | KU296312 | 07/01/2015 | non_stated | Western_Urban | 18744 | 36027  | 190 | 326.75  |
| 3007_C2_77648_EMLK | KU296620 | 07/01/2015 | non_stated | Western_Urban | 18746 | 26842  | 207 | 267.76  |
| 3007_C2_77649_EMLK | KU296380 | 07/01/2015 | non_stated | Western_Urban | 18748 | 50316  | 192 | 461.62  |

SM Table 2 Page 1 Primers, positions

| AMPLICON_ID            | FWD_PRIMER                       | REV_PRIMER                        | POOL_NAME | Position1 | Position2 |
|------------------------|----------------------------------|-----------------------------------|-----------|-----------|-----------|
| KM034562v1_1.1.22751   | ACACAAAAAGAAAGAATTTTtaggatcttt   | CACCCTGCAGAGTTTAAGGC              | Pool1     | 38        | 256       |
| KM034562v1_1.1.26078   | ACCAAGATAGAGAACAACCTAGGTCT       | TTCTAATGTTTTACCCAGGCTTTAGG        | Pool2     | 178       | 400       |
| KM034562v1_1.1.136463  | GCAGGGTGATCCAACAACCT             | ACTCGGCGTCATCCAGAC                | Pool1     | 288       | 490       |
| KM034562v1_1.1.118581  | GACAAATTGCTCGGAATCACAAAATTC      | ATGATGAAGACAAAGCATGAGAAGGAA       | Pool2     | 464       | 685       |
| KM034562v1_1.1.96185   | GCCCGAGTCTCACTGAATCT             | TGACTGCGCCACTTTCCCA               | Pool1     | 520       | 740       |
| KM034562v1_1.1.81337   | CATGCGTACCAAGGAGATTACAAAC        | ACCTTCTCAAGGCAAGCCTTT             | Pool2     | 734       | 963       |
| KM034562v1_1.2.80110   | ATGCCGGTCAGTTCCTCTC              | TGGCATCATGTCCGGCAA                | Pool1     | 924       | 1133      |
| KM034562v1_1.2.266471  | GGCAAATTCAGTACATGCAGAGC          | ATGGAGACGAACTCCTCGTTCT            | Pool2     | 1013      | 1242      |
| KM034562v1_1.2.334435  | TGATGCCAACGATGCTGTGA             | ACAGTTGAGGGGAAAAGACCATGC          | Pool1     | 1163      | 1395      |
| KM034562v1_1.2.284911  | GTCTCCATCTCTTGCAAGGAC            | GAGTTGCTTCTCAGCCTCAGT             | Pool2     | 1278      | 1510      |
| KM034562v1_1.2.306584  | TCAACTGTTCGCAATTGCAC             | GGCCAGGCGCTCTTTTCT                | Pool1     | 1430      | 1660      |
| KM034562v1_1.2.94906   | CAACTCCAACAATATGCGGAGTCT         | TCATCTTGATGGCCAGGATTGTC           | Pool2     | 1549      | 1777      |
| KM034562v1_1.2.148817  | CCTGGCCAAAGCTGACAGA              | ACTCATGCGGTTTTTCGAGT              | Pool1     | 1689      | 1883      |
| KM034562v1_1.2.96357   | CAAGATGATGATCCGACTGACTCAC        | ATCTGTTAGGCACTGGCTTGG             | Pool2     | 1817      | 1952      |
| KM034562v1_1.3.203962  | GCATGAGTGCACCAGATGAC             | CATGCGAGGGCTGGTTGA                | Pool1     | 1915      | 2134      |
| KM034562v1_1.3.253845  | TAACAGATCGACCAAGGGTGGA           | ATCTGACTCTAAGGGCGGAAGG            | Pool2     | 1987      | 2211      |
| KM034562v1_1.3.271473  | TCGCTAGCTGACCCCAAT               | CTGGCTGGGTGTTGTCCT                | Pool1     | 2163      | 2383      |
| KM034562v1_1.3.61085   | AGTCGAGTATGAAGAACAGGACAG         | ATGATAATACAAAACGGCATCAAATGGC      | Pool2     | 2250      | 2448      |
| KM034562v1_1.3.115064  | CCAGCCAGAACATTCTTTTGAGG          | GGCCAATAAAATTTGTGACCATCCA         | Pool1     | 2417      | 2612      |
| KM034562v1_1.3.116103  | CCAGTGATGGTAAAGAGTACACGTATC      | ACATCAAAAATTTCTTCTGTTGCGT         | Pool2     | 2534      | 2749      |
| KM034562v1_1.3.75358   | ATTGGCCAGTAATGAATCACAGGAA        | CTGTGGCTTAACGCTTATTGTCAT          | Pool1     | 2655      | 2876      |
| KM034562v1_1.4.252452  | KM034562v1_1.4.252452            | ACATTGAGGACAAATAGCTTCTAGTGCT      | Pool2     | 2872      | 3077      |
| KM034562v1_1.4.51313   | AGCCACAGTTATAGCCATAATGGTAAC      | GTATGGCCCTGCCCTTT                 | Pool1     | 2919      | 3142      |
| KM034562v1_1.4.283502  | TGGCCTAACACAGATGACAACTAGAAC      | ACCTCTCAAAACTATGATTGCAAATTG       | Pool2     | 3142      | 3357      |
| KM034562v1_1.4.177274  | GATGCGCAACAGTCAAAACC             | CACAAACCTGTTCAATGAGGAG            | Pool1     | 3348      | 3511      |
| KM034562v1_1.4.110197  | CATTGGCTTGTGTGCAACAA             | CCCCGAAGCTTCTTCTCTCA              | Pool2     | 3425      | 3655      |
| KM034562v1_1.4.227114  | GGTTTGCTGAGATGGTTGC              | TGTCAGGTTTCCCAAAATTTCTCTCA        | Pool1     | 3547      | 3757      |
| KM034562v1_1.4.78271   | ATTGAATCTAGAGATGAGACTGTCCCT      | GGCCTGGAAGTCTCAGATGAAT            | Pool2     | 3707      | 3902      |
| KM034562v1_1.5.42730   | ACCTGACATTTTCGGCAAAGGA           | GGGAATGTCACCTCGAGAGC              | Pool1     | 3796      | 4020      |
| KM034562v1_1.5.170899  | CTGAAGGAGACTCCCTCAATG            | TTGAAGCCTCTGCTATTAGTTGCC          | Pool2     | 3952      | 4176      |
| KM034562v1_1.5.35906   | ACATTCCCGAGCTTGCC                | AGCGGGATATGAACAATTTTATCTTGGT      | Pool1     | 4050      | 4277      |
| KM034562v1_1.5.223349  | GCTTCAACTGCTGAAGTATAGGGT         | ATTTTGCTCAACGTTTACAAGATGAAGG      | Pool2     | 4217      | 4440      |
| KM034562v1_1.5.74938   | ATCCGCTAGCAGCTTTAAAGATAAA        | TTGCCACCCCTAGCAATTGT              | Pool1     | 4323      | 4550      |
| KM034562v1_1.5.72370   | ATATGAGGCGGGTTATATTGCCTAC        | GGGCGGATATGACATTCACC              | Pool2     | 4501      | 4711      |
| KM034562v1_1.5.245783  | GGTGGAACAGCAATACAGG              | GATGGCGCGCGTAGTTGA                | Pool1     | 4582      | 4805      |
| KM034562v1_1.5.239118  | GGGCCCCAAAGTGCTAATGAA            | GGAGGAAAGCCTGGTTTCCAA             | Pool2     | 4747      | 4932      |
| KM034562v1_1.6.132275  | CCGCCATCATGCTTGCTT               | CGCAACGCTCCATTGATCC               | Pool1     | 4833      | 5069      |
| KM034562v1_1.6.312041  | TTCTCTCCAGGAGTTCGTTCTTC          | TAAAGTCTGGAGTGAAGTCATTATTGC       | Pool2     | 4968      | 5192      |
| KM034562v1_1.6.208802  | GCTTGCGTCCAGGAATTT               | ACTTTGGGCAAAAGAACAGGGATGA         | Pool1     | 5100      | 5328      |
| KM034562v1_1.6.221389  | GGACTTTAAGATCGTTCGAATTGATCCA     | CTTCTCAACCACAGCTGGAAGA            | Pool2     | 5240      | 5434      |
| KM034562v1_1.6.202261  | GCCAAAGTACATTGGGTTGGAC           | AAGAGACAATGTGTAAAGCACCTT          | Pool1     | 5366      | 5570      |
| KM034562v1_1.6.270229  | TCCAGTTTACAGAATCTTCTCAGGGA       | AGAGTATGTGCAATGAGAAAGATTGACA      | Pool2     | 5505      | 5721      |
| KM034562v1_1.6.297059  | TGTTCTTTTCTCTCTAAATGTAGAGCTT     | GGCTGCTCTCAGATGAAGCA              | Pool1     | 5617      | 5775      |
| KM034562v1_1.6.253953  | TACTCTTTGTCTTATCCTCAAATTGCC      | AGGACCTGATGACCCTACTC              | Pool2     | 5771      | 5959      |
| KM034562v1_1.7.211634  | GGACAGCCAGTGTGACTTGG             | CCATTGTGTTGTCGCTCAC               | Pool1     | 5808      | 6022      |
| KM034562v1_1.7.100934  | CAGGTCCTTTTCAATTGGATAACCAAAA     | TCCAAGCGGGATGGAATAATGT            | Pool2     | 6000      | 6125      |
| KM034562v1_1.7.95000   | CACAATGGGTGTTACAGGAATATTGC       | CGGACCTGAAGCCCCATC                | Pool1     | 6060      | 6291      |
| KM034562v1_1.7.136853  | CGTTTGGAGTTATCCACAATAGTACATT     | GCTGTGGTAGACACTCACTC              | Pool2     | 6166      | 6391      |
| KM034562v1_1.7.251893  | GTCCGGTGTCCCAACAAA               | CGACACCTTCAGCGAAAGTC              | Pool1     | 6322      | 6559      |
| KM034562v1_1.7.297656  | TGCCGGTATGTGCACAAAGTAT           | CAAAACCGGTAGCCTGATATCTAATTGT      | Pool2     | 6462      | 6686      |
| KM034562v1_1.7.56640   | AGGTGTCGTTGCAATTTCTGACT          | TGGTGTGCTCCTCTTCCC                | Pool1     | 6595      | 6827      |
| KM034562v1_1.7.140899  | CGTTTGGAACTAATGAGACAGAGTAC       | GGTCCGTTGTGATACAGCTGTG            | Pool2     | 6734      | 6960      |
| KM034562v1_1.8.7962    | AACACCACGGGAAACTAATTTGGA         | TTCTTCTTCTGACTGTGCACTT            | Pool1     | 6864      | 7091      |
| KM034562v1_1.8.11617   | AACGGACCCAAAAACATCAGTG           | TTGAGTTGCCTCAGAGATGTCAAG          | Pool2     | 6995      | 7222      |
| KM034562v1_1.8.209136  | GGAAGGAAAGCTGCAGTGTCT            | AGTCAGCGCTTCTACTCGTG              | Pool1     | 7125      | 7344      |
| KM034562v1_1.8.85723   | CAACTCAAGTTGGACAACATCACCC        | TAGTATTGGTAATTAAGCCTAGCTTCCC      | Pool2     | 7262      | 7465      |
| KM034562v1_1.8.204342  | GCTGACTCCCTGGACCTC               | TTGCAGCACCTTTCATCTGTA             | Pool1     | 7375      | 7596      |
| KM034562v1_1.8.89003   | CAATACTATTGCTGGAGTAGCAGGAC       | CTCAGGAACAGTTGGAGAGCTT            | Pool2     | 7511      | 7736      |
| KM034562v1_1.8.270719  | TGCTGCAATCGGATTGGC               | CGGTCCCAAAATGTGGCATG              | Pool1     | 7626      | 7835      |
| KM034562v1_1.9.262042  | TTCTGAGAGGCCAACCTGAG             | ATACCTGCCGGTATCCATTGTC            | Pool2     | 7771      | 7982      |
| KM034562v1_1.9.250004  | TGGGACCGGACTGCTGTA               | TGCCGTGAAACAATCTGAAGAAAG          | Pool1     | 7865      | 8069      |
| KM034562v1_1.9.175749  | GCAGGTATTGGAGTTACAGGTGTTATA      | CATTGGCTATGTTTGAAGCTCCAG          | Pool2     | 8023      | 8180      |
| KM034562v1_1.9.225908  | TCACGGCAAACTCAACCTCA             | GATTGTAGAATCAAGGATGAAGACTAAAGATAA | Pool1     | 8106      | 8318      |
| KM034562v1_1.9.177909  | GCCAATGTGATTCTAACTCCTTTAAACTC    | TCTACCGGTTTGAGATCTGATTATTAC       | Pool2     | 8226      | 8399      |
| KM034562v1_1.9.89770   | CAATCATGACAGTTGTCTTTAATGAAAAAGGA | TCACTTCGATAATTTCTCTGGATGAT        | Pool1     | 8378      | 8594      |
| KM034562v1_1.9.274099  | TTTAGTTGTAACCTAACACACACAAAGC     | AGGAACTGTTAATGGTTCAACTCTCTTC      | Pool2     | 8456      | 8675      |
| KM034562v1_1.9.126340  | CGAGGTGAGTACCGTCAATCAA           | CGAGTCTTGGGTGCAGT                 | Pool1     | 8635      | 8862      |
| KM034562v1_1.10.94624  | CAGTTCCTCCAGCACCTAAAGAC          | CCAGTGTCTCGCCTCTTGAT              | Pool2     | 8718      | 8949      |
| KM034562v1_1.10.52601  | AGGACTTCGCGCTTAGCAAA             | CAAGCCTTCCGCGCTT                  | Pool1     | 8891      | 9089      |
| KM034562v1_1.10.120641 | CGAGACAAGACATCCGAACCATAG         | TCGGTCCCATTGTTGCCATAG             | Pool2     | 8995      | 9183      |
| KM034562v1_1.10.56321  | AGGGCTTGGGCAAGATCAG              | CATGTCCCGGGTGGTT                  | Pool1     | 9117      | 9329      |
| KM034562v1_1.10.187846 | GGGACCGACAATCCCTAATTATGTTT       | CGGAGTATTGTATCAAGTAGAAGGTT        | Pool2     | 9222      | 9398      |
| KM034562v1_1.10.172265 | GGGACATGCTCATGGTCTGAT            | TGCTTGGCAGGTTATATTGCGA            | Pool1     | 9360      | 9590      |
| KM034562v1_1.10.48590  | AGAGGTATGATATAACCCAAACATTGACC    | CTCTCTCCAACTTGAAGCA               | Pool2     | 9565      | 9762      |
| KM034562v1_1.10.170987 | GCCAAGCATACCTCTTGAC              | TTTAGCTTTCCGGTCACAATATACCT        | Pool1     | 9624      | 9852      |

# SM Table 2 Page 2 Primers, positions

|                        |                                  |                                  |       |       |       |
|------------------------|----------------------------------|----------------------------------|-------|-------|-------|
| KM034562v1_1.10.182045 | GGAGGAGGTCTATGGTATTGCTA          | ATTTTGCTAAAAGGAGATGAAGAATGCC     | Pool2 | 9799  | 9946  |
| KM034562v1_1.11.187040 | GATGAAGATTAAATGCGGAGGTCTGA       | GGAGTTAGCCAGATTATGCACT           | Pool1 | 9909  | 10135 |
| KM034562v1_1.11.270837 | TATTTCAGGATAGTCCAGTAGTGACA       | GTGGGCTCTTTTCAGCCAAT             | Pool2 | 10003 | 10173 |
| KM034562v1_1.11.147034 | CTAACTCCACCAGGTCAACTCC           | GACAACCCCTTTCTCCAGGTC            | Pool1 | 10173 | 10389 |
| KM034562v1_1.11.120212 | CCCACCTACAACGAACATTACTTTGA       | AACTTTCCACCTTGAATAGTTTGACT       | Pool2 | 10215 | 10437 |
| KM034562v1_1.11.229840 | GGGTGTGCTTAAAGCGACCTCT           | TGCCACAGCGGTGATTTC               | Pool1 | 10423 | 10605 |
| KM034562v1_1.11.213767 | GGAAGTTTATTGGGCTGGTATTGAGTT      | AGCAGCCAATCAGAGATCAGAC           | Pool2 | 10484 | 10702 |
| KM034562v1_1.11.306918 | TGTGGGCACTGAGAGTCATC             | TGACACGTTGTGTTCGCATG             | Pool1 | 10635 | 10748 |
| KM034562v1_1.11.299831 | TGGTGCTAACAACCAACTAA             | TCTTGGAGCTCCACCAGAAAAAC          | Pool2 | 10739 | 10930 |
| KM034562v1_1.12.39357  | ACGTGTCAAGGAACAATTGAGC           | TGTGGACTCATGAAGGAGGGA            | Pool1 | 10782 | 11001 |
| KM034562v1_1.12.156564 | CTCCAAGAACCCGACAAATCG            | AGAATTAACATTTGCATTGTCGTCGAG      | Pool2 | 10965 | 11045 |
| KM034562v1_1.12.61658  | AGTCCACACTGAAAGCATTTACACA        | GAAGCTGGCTTACAGTGAGGA            | Pool1 | 11039 | 11242 |
| KM034562v1_1.12.141658 | CTCAATAGTTAACTTGACATCTCTGCCT     | CATGACCTGCGGGTTTAGTTACA          | Pool2 | 11171 | 11395 |
| KM034562v1_1.12.111167 | CCAGTCTTCAAGTTGACACC             | AAGCAGTTTTTCTTAATCTTCTCAAGC      | Pool1 | 11275 | 11496 |
| KM034562v1_1.12.59978  | AGGTCATGTGTGTTAGGTTTCACAAAT      | GTATGATGAATACAACCCGCAAGC         | Pool2 | 11437 | 11661 |
| KM034562v1_1.12.12624  | AACTGCTTATTGGGTCTTCCGT           | TGTCGCCACTGGTACATCAC             | Pool1 | 11539 | 11770 |
| KM034562v1_1.12.104887 | CATCATACTCCCTTAATCCGCAACT        | AATATTTGAGGAAGAGAGCATCTTGCACT    | Pool2 | 11702 | 11901 |
| KM034562v1_1.13.334030 | TGGCGACATTGCCATAGAT              | AGCCAGGTCATACCAGAAAAACATT        | Pool1 | 11802 | 12023 |
| KM034562v1_1.13.257489 | GGTGCTCAAGAAGACTGTGTTGAT         | GGGATTCTTGTGTGTTCACTG            | Pool2 | 11967 | 12175 |
| KM034562v1_1.13.45122  | ACCTGGCTATTTAACTCGAAGGG          | ACATCGGCAGTAGAAACAGAAACA         | Pool1 | 12064 | 12263 |
| KM034562v1_1.13.236582 | GGAATCCCCCATGCTGCTATG            | GAGAGTAAGTAATCTCCGCTCTGG         | Pool2 | 12210 | 12410 |
| KM034562v1_1.13.219986 | GCCGATGTCTTGATAATGTGCAA          | GCCCTCTCTCTCGGTGTAC              | Pool1 | 12303 | 12512 |
| KM034562v1_1.13.352902 | TTACTTCCATATTAGGGTCTGATGGG       | GGCGCATCTCCGCGCTTATC             | Pool2 | 12453 | 12644 |
| KM034562v1_1.13.236099 | GGAAGGGCCGATTCTTAACACA           | AGGGCGTAATGCTTTTAGCAC            | Pool1 | 12545 | 12762 |
| KM034562v1_1.13.196664 | GACGCCACAACAACCTTGTGA            | GCAACGGAGGGAATTGATTTCCT          | Pool2 | 12680 | 12911 |
| KM034562v1_1.14.157796 | CGCCCTATCGTGATTTTCGAGA           | CTTTCTACTCGATGACTCTGTCT          | Pool1 | 12799 | 13028 |
| KM034562v1_1.14.294573 | TTCCTTGCCAATGATTAAAGAACTG        | TACTCGAGTTTTTGGCGTAGG            | Pool2 | 12951 | 13177 |
| KM034562v1_1.14.253147 | GTAGAAAGGACATGCTGGGATGC          | TTGCGAGTCGGATAAGGCAAT            | Pool1 | 13067 | 13274 |
| KM034562v1_1.14.174048 | CTCGAGTATCTACTACCACAATATCGGA     | CATGCTCACGAAATCATCACTT           | Pool2 | 13219 | 13421 |
| KM034562v1_1.14.46501  | ACTCGCAATGTTCAAACACTTTGT         | ACGGTTGCAATATTTATAAAAAGGTGCT     | Pool1 | 13311 | 13514 |
| KM034562v1_1.14.306556 | TGAGCATGCCACAGTTAGAGG            | CCTTCAATCCCTCCCATATGACC          | Pool2 | 13457 | 13686 |
| KM034562v1_1.14.210333 | GCAACCGTTGCTATGGTGTT             | GCTGAGCGCAACTTAAACCA             | Pool1 | 13554 | 13772 |
| KM034562v1_1.14.94569  | ATTGAAGGACTGCAACAAAACTCTG        | GGGAAGACTGATAAACCGGTAATGC        | Pool2 | 13727 | 13813 |
| KM034562v1_1.15.144499 | CGCTCAGCTGTGATGGGT               | GTGCCATCTTGTAGCCGTTT             | Pool1 | 13803 | 14029 |
| KM034562v1_1.15.220264 | GCCTGTGGAATCTTTTAAACCTGATG       | TGCAAGATTCTCACGGAAGAAG           | Pool2 | 13951 | 14174 |
| KM034562v1_1.15.242306 | GCGACCATGTCTGATGCAATT            | CACCTGCGGTACCGCTAG               | Pool1 | 14067 | 14286 |
| KM034562v1_1.15.8965   | AACCTCTGGATTTCGGAACAATATCATT     | AAATGAAGTTAAGCTTGGCAGCCA         | Pool2 | 14282 | 14504 |
| KM034562v1_1.15.332596 | TGGGAAGTGCATGCCAT                | CTCGGCGTGCCTGAAAT                | Pool1 | 14468 | 14681 |
| KM034562v1_1.15.192915 | GACTTCGAAGACGAAATGGTTTGAAG       | GTTAAAGCCTCCGCCAGGATA            | Pool2 | 14634 | 14861 |
| KM034562v1_1.15.223312 | GCGGGAAGCGATTGCAAAAT             | GTGGCTCCAATAAGAGGCTCTCC          | Pool1 | 14718 | 14950 |
| KM034562v1_1.16.133565 | CCCAAATAACTGCACAGTTGATTAGC       | TGGGATTCCATCCCCGATAGT            | Pool2 | 14909 | 15135 |
| KM034562v1_1.16.243572 | GGAGCCACACTCCCATGT               | AAGGCTGCGGAAGGACATT              | Pool1 | 14982 | 15208 |
| KM034562v1_1.16.307167 | TCAAGGACAGAAGATAAGATAGGGCAA      | TTACTCATACGATTGGCCATGAAAGAAT     | Pool2 | 15192 | 15412 |
| KM034562v1_1.16.219189 | GAGCCTTAAGAGAGGCCATT             | CCTCTCAAGAACTCAATAAGTGT          | Pool1 | 15240 | 15469 |
| KM034562v1_1.16.95014  | ATGAGTAACCTCAGCAACGCGAT          | TCTCGGTATCTTGTAAATCTAAATCCAATGT  | Pool2 | 15454 | 15675 |
| KM034562v1_1.16.139270 | CCGGGAGGTACCACTCA                | GCTAGCTCCATCCAGATAAAGTG          | Pool1 | 15656 | 15831 |
| KM034562v1_1.16.77747  | ATCCTCTAAAAGGAGGACTCAATTGC       | AAAGGCCCCAAACTGTACAGAA           | Pool2 | 15756 | 15970 |
| KM034562v1_1.17.210449 | GAGCTAGCTAAGACCATCATGCAA         | ATGTTGGCTTAAGTATTCGAATGAG        | Pool1 | 15870 | 16094 |
| KM034562v1_1.17.253663 | GGGCTTTGTAAAGTTATTATCTGGCA       | CGCATCTGAGAGTCTCTGTC             | Pool2 | 16012 | 16197 |
| KM034562v1_1.17.228423 | GCCAACATTCAACATGCAAGC            | GCACCAGCAGTCTACGATCT             | Pool1 | 16134 | 16363 |
| KM034562v1_1.17.123166 | CAGATGCGGCCAGGTTATTTTG           | GAAATTGCTGGCTGACTCTTACATG        | Pool2 | 16233 | 16459 |
| KM034562v1_1.17.239542 | GCTGGTGCATGATTCATCAAGAC          | TGCCATCATGTGGATCTCTGG            | Pool1 | 16399 | 16618 |
| KM034562v1_1.17.224467 | GCAATTCTTCCATGCGTCATTGG          | GGTGGCTGTTCTCTTGTGGAA            | Pool2 | 16501 | 16690 |
| KM034562v1_1.17.319099 | TGATGGCACTGAACGGAGTC             | TGGCGTGTCCCTTGAGATAATG           | Pool1 | 16651 | 16879 |
| KM034562v1_1.17.255237 | GGTCCGTGTTCCAGTCATT              | CGGATCTCAATTGCCGTAAAGTACTTT      | Pool2 | 16734 | 16943 |
| KM034562v1_1.18.33209  | ACACGCCAATTAACGTCACTCA           | CCAGCACCTTCTCCCTCTG              | Pool1 | 16915 | 17080 |
| KM034562v1_1.18.224597 | GAGATCCGTCATTGATACCACAGTTTAT     | AGCATCTAGGAGTACTGATCTCTG         | Pool2 | 16989 | 17188 |
| KM034562v1_1.18.278158 | GGTGCTGGTGCTTACTATTGA            | CATCCATGGGTATAACCTCGACTTGC       | Pool1 | 17113 | 17336 |
| KM034562v1_1.18.366966 | TGCTTCTACCTGTTATGTCAAATTTCCA     | TCATTAGAAAGACTTTAAGGACCACTG      | Pool2 | 17237 | 17452 |
| KM034562v1_1.18.141578 | CATGGATGCAGAGACGACAGA            | GGTGTGGCATCTTACGTGTAGT           | Pool1 | 17375 | 17607 |
| KM034562v1_1.18.42331  | ACCGAGGGTATGTTATGGCTAAATG        | GCGGATATAGCTTAAATGTAAATCGCA      | Pool2 | 17506 | 17727 |
| KM034562v1_1.18.142489 | CCAAACCATCTCAGTTGTAAGCAG         | GTGCTGTTGATTATAATCAATTGGTCAATT   | Pool1 | 17652 | 17872 |
| KM034562v1_1.19.57829  | ATATCCGCTTGGTTTTCCATCAT          | CCATGTCCATTATGTTTTAATGCTTGT      | Pool2 | 17770 | 17993 |
| KM034562v1_1.19.149689 | GCGACAAAGTCGGAAGTCAAAAC          | TCAGCCTTTCGATAAGCTTAACCTCA       | Pool1 | 17918 | 18146 |
| KM034562v1_1.19.157099 | GGACATGGCAAGCTGAGTTTAAAG         | AATACTATGCACGGTTATTCAATCGAAC     | Pool2 | 18036 | 18209 |
| KM034562v1_1.19.46656  | AGGCTGACAGGGCTTCTG               | TGCAGCAGTAAATGTCACACATG          | Pool1 | 18183 | 18416 |
| KM034562v1_1.19.10982  | AACGAAAGGAGTCTTACATTATACACT      | CCAAAGCACTATTCATCTGGCA           | Pool2 | 18368 | 18545 |
| KM034562v1_1.19.115440 | CTGCTGCAATGAGTCTAACGC            | ATCACCATTTTTAAATCGACAAATTAAGCAA  | Pool1 | 18453 | 18629 |
| KM034562v1_1.19.215226 | TGCTTTGGTTGATAACACGACTTCTTAA     | ATCAATAACCAAGAGATTATTATCTAGTCTGC | Pool2 | 18588 | 18802 |
| KM034562v1_1.19.62807  | ATGGTGATAGCCTTAATCTTTGTGTAAATAAG | TTAAATTTTGTGTGCGACCATTTTTCC      | Pool1 | 18686 | 18898 |
| LMNA.ENCTRL.E3E4       | CTGAGAACAGGCTGCAGACCATGAA        | ACTCACGCTGCTTCCATTGTCAA          | Pool1 |       |       |
| LMNA.ENCTRL.E3E4.1     | CTGAGAACAGGCTGCAGACCATGAA        | ACTCACGCTGCTTCCATTGTCAA          | Pool2 |       |       |
| MYC.ENCTRL.E2E3        | CCTGGTGTCCATGAGGAGACA            | GTGATCCAGACTCTGACCTTTTGCCA       | Pool1 |       |       |
| MYC.ENCTRL.E2E3.1      | CTGGTGTCCATGAGGAGACA             | GTGATCCAGACTCTGACCTTTTGCCA       | Pool2 |       |       |
| TBP.ENCTRL.E3E4        | GACTCCCATGACCCCATC               | ACGAAGTGAATGGTCTTTAGGT           | Pool1 |       |       |
| TBP.ENCTRL.E3E4.1      | GACTCCCATGACCCCATC               | ACGAAGTGAATGGTCTTTAGGT           | Pool2 |       |       |
| HMB5.ENCTRL.E8E9       | CCAGCTCCTGCGAAGAG                | AGGATGATGGCACTGAAGTCC            | Pool1 |       |       |
| HMB5.ENCTRL.E8E9.1     | CCAGCTCCTGCGAAGAG                | AGGATGATGGCACTGAAGTCC            | Pool2 |       |       |
| ITGB7.ENCTRL.E14E15    | CCTATCTTGGATGATGGCTGGTGCAAG      | CGTGTGGTCTGCTCCCTTTTCTTG         | Pool1 |       |       |
| ITGB7.ENCTRL.E14E15.1  | CCTATCTTGGATGATGGCTGGTGCAAG      | CGTGTGGTCTGCTCCCTTTTCTTG         | Pool2 |       |       |

SM\_Table 3 Ion Torrent Repeat Sequencing

| Sample     | genome_1           | GenBank  | genome_2           | differences | nt_diff | indel |
|------------|--------------------|----------|--------------------|-------------|---------|-------|
| 14729_EMLK | 0807_C1_14729_EMLK | KU296392 | 1807_C2_14729_EMLK | 0           | 0       | 0     |
| 14743_EMLK | 0807_C1_14743_EMLK | KU296298 | 1807_C2_14743_EMLK | 1           | 1       | 0     |
| 14750_EMLK | 0807_C1_14750_EMLK | KU296459 | 1807_C2_14750_EMLK | 0           | 0       | 0     |
| KT4609     | 1706_C1_KT4609     | KU296622 | 0806_C2_KT4609     | 0           | 0       | 0     |
| MK0369     | 1708_C1_MK0369R    | KU296413 | 1007_C2_MK0369     | 1           | 0       | 1     |
| MK0375     | 1708_C1_MK0375R    | KU296606 | 0507_C2_MK0375     | 1           | 0       | 1     |
| MK0384     | 1708_C1_MK0384R    | KU296628 | 0507_C2_MK0384     | 1           | 0       | 1     |
| MK0388     | 1708_C1_MK0388R    | KU296630 | 1007_C2_MK0388     | 1           | 0       | 1     |
| MK0425     | 1708_C1_MK0425R    | KU296379 | 0507_C2_MK0425     | 1           | 0       | 1     |
| MK0431     | 1708_C1_MK0431R    | KU296621 | 1007_C2_MK0431     | 1           | 0       | 1     |
| MK0434     | 2208_C1_MK0434R2   | KU296554 | 1708_C1_MK0434R    | 2           | 0       | 2     |
| MK0491     | 1708_C1_MK0491R    | KU296510 | 0208_C2_MK0491R    | 3           | 0       | 3     |
| MK0531     | 1708_C1_MK0531R    | KU296448 | 0208_C2_MK0531R    | 1           | 0       | 1     |
| MK0607     | 1007_C2_MK0607     | KU296335 | 1708_C1_MK0607R    | 1           | 0       | 1     |
| MK1036     | 1708_C2_MK1036R    | KU296834 | 1007_C2_MK1036     | 1           | 1       | 0     |
| MK1888     | 1007_C2_MK1888     | KU296708 | 1706_C1_MK1888     | 0           | 0       | 0     |
| MK2341     | 1805_C1_MK2341     | KU296494 | 1805_C1_MK2341R    | 0           | 0       | 0     |
| MK2371     | 1105_C2_MK2371     | KU296397 | 1805_C1_MK2371     | 6           | 0       | 6     |
| MK2789     | 2208_C1_MK2789R3   | KU296613 | 1708_C2_MK2789R2   | 4           | 0       | 4     |
| MK2790     | 1105_C1_MK2790     | KU296452 | 1708_C2_MK2790R    | 2           | 0       | 2     |
| MK2826     | 0807_C2_MK2826     | KU296405 | 1708_C2_MK2826R    | 2           | 0       | 2     |
| PL4105     | 1007_C2_PL4105     | KU296694 | 2906_C1_PL4105     | 0           | 0       | 0     |
| PL5133     | 2605_C2_PL5133R    | KU296489 | 2605_C2_PL5133     | 0           | 0       | 0     |
| PL6049     | 0205_C2_PL6049     | KU296743 | 0305_C1_PL6049     | 2           | 0       | 2     |
| PL7376     | 0806_C1_PL7376     | KU296740 | 0106_C2_PL7376     | 10          | 0       | 10    |
| PL7401     | 0806_C1_PL7401     | KU296819 | 0106_C2_PL7401     | 7           | 0       | 7     |
| PL7577     | 0807_C1_PL7577     | KU296385 | 0806_C1_PL7577     | 1           | 0       | 1     |
| PL9150     | 1807_C1_PL9150R    | KU296522 | 1507_C1_PL9150     | 0           | 0       | 0     |

# SM\_Table 4 MinION Ion Torrent overlap

| Sample | Minion genome                                  | Ion Torrent genome  | GenBank  | differences | nt differences | indels | nt overlap | nt after N removal | nts missing in Minion/IT overlap |
|--------|------------------------------------------------|---------------------|----------|-------------|----------------|--------|------------|--------------------|----------------------------------|
| 020380 | EBOV KAM020380 MinION SLE Kambia-- 2015-08-28  | 0109_C2_020380_EMLK | KU296775 | 5           | 0              | 5      | 18886      | 17796              | 1090                             |
| 508124 | EBOV KAM0508124 MinION SLE Kambia-- 2015-09-04 | 0809_C1_020484_EMLK | KU296462 | 5           | 0              | 5      | 18887      | 17795              | 1092                             |
| 20524  | EBOV KAM020524 MinION SLE Kambia-- 2015-09-08  | 1009_C1_20524_EMLK  | KU296424 | 5           | 0              | 5      | 18746      | 17680              | 1066                             |
| 20573  | EBOV KAM020573 MinION SLE Kambia-- 2015-09-09  | 1209_C1_020573_EMLK | KU296654 | 4           | 0              | 4      | 18820      | 17749              | 1071                             |
| 13013  | EBOV MK013013 MinION GUI Bombali-- 2015-09-15  | 1309_C2_MK13013     | KU296454 | 1           | 0              | 1      | 18874      | 15960              | 2914                             |

## SM Table 5 Page 1 Residual Primers

| Genome_ID                  | number_reads | reads_examined | average_read_length | no_reads_primer_ends | fraction |
|----------------------------|--------------|----------------|---------------------|----------------------|----------|
| 0106_C2_KT2315             | 46319        | 10000          | 197.086             | 33                   | 0.001    |
| 0106_C2_KT2316             | 49331        | 10000          | 193.395             | 23                   | 0        |
| 0106_C2_KT2317             | 123234       | 10000          | 192.881             | 27                   | 0        |
| 0106_C2_KT2321             | 98831        | 10000          | 194.351             | 25                   | 0        |
| 0106_C2_KT2449             | 156082       | 10000          | 180.951             | 7                    | 0        |
| 0106_C2_KT2641             | 48461        | 10000          | 194.404             | 34                   | 0.001    |
| 0106_C2_PL7375             | 47465        | 10000          | 183.56              | 14                   | 0        |
| 0109_C2_020380_EMLK_ABCDEF | 346228       | 10000          | 202.716             | 22                   | 0        |
| 0205_C1_PL5249             | 151610       | 10000          | 161.926             | 9                    | 0        |
| 0205_C1_PL5260             | 347623       | 10000          | 184.169             | 24                   | 0        |
| 0205_C1_PL5294             | 504789       | 10000          | 184.149             | 6                    | 0        |
| 0205_C1_PL5361             | 135185       | 10000          | 186.824             | 20                   | 0        |
| 0205_C1_PL5428             | 527028       | 10000          | 166.992             | 7                    | 0        |
| 0205_C2_PL5674             | 458553       | 10000          | 183.555             | 37                   | 0        |
| 0205_C2_PL5801             | 633677       | 10000          | 184.277             | 8                    | 0        |
| 0205_C2_PL5803             | 716659       | 10000          | 200.306             | 27                   | 0        |
| 0205_C2_PL5868             | 538598       | 10000          | 203.316             | 35                   | 0        |
| 0205_C2_PL5950             | 58745        | 10000          | 192.022             | 32                   | 0.001    |
| 0205_C2_PL6049             | 140295       | 10000          | 189.475             | 26                   | 0        |
| 0205_C2_PL6070             | 339601       | 10000          | 195.691             | 35                   | 0        |
| 0205_C2_PL6086             | 445542       | 10000          | 176.155             | 15                   | 0        |
| 0205_C2_PL6158             | 208506       | 10000          | 188.908             | 28                   | 0        |
| 0208_C1_77667_EMLK         | 133677       | 10000          | 192.371             | 22                   | 0        |
| 0208_C1_77669_EMLK         | 65256        | 10000          | 201.881             | 36                   | 0.001    |
| 0208_C1_77670_EMLK         | 137666       | 10000          | 198.735             | 31                   | 0        |
| 0208_C1_77673_EMLK         | 97509        | 10000          | 197.121             | 15                   | 0        |
| 0208_C1_77675_EMLK         | 81740        | 10000          | 201.123             | 39                   | 0        |
| 0208_C1_77676_EMLK         | 385781       | 10000          | 202.268             | 14                   | 0        |
| 0208_C1_77677_EMLK         | 148594       | 10000          | 197.601             | 21                   | 0        |
| 0208_C1_77679_EMLK         | 89922        | 10000          | 200.243             | 37                   | 0        |
| 0208_C1_77681_EMLK         | 202379       | 10000          | 191.619             | 15                   | 0        |
| 0208_C1_MK10128R           | 491743       | 10000          | 206.166             | 14                   | 0        |
| 0208_C1_MK10173            | 327169       | 10000          | 203.247             | 9                    | 0        |
| 0208_C2_KT4828R            | 209631       | 10000          | 197.897             | 23                   | 0        |
| 0208_C2_KT4935R            | 266894       | 10000          | 196.563             | 15                   | 0        |
| 0208_C2_KT5022R            | 193794       | 10000          | 198.367             | 30                   | 0        |
| 0208_C2_KT5245R            | 162930       | 10000          | 197.671             | 15                   | 0        |
| 0305_C1_PL4651             | 174270       | 10000          | 185.104             | 22                   | 0        |
| 0305_C1_PL4696             | 447181       | 10000          | 195.255             | 28                   | 0        |
| 0305_C1_PL4844             | 153411       | 10000          | 192.158             | 28                   | 0        |
| 0305_C1_PL4932             | 389248       | 10000          | 203.053             | 44                   | 0        |
| 0305_C1_PL5025             | 213904       | 10000          | 193.526             | 17                   | 0        |
| 0305_C1_PL5201             | 235681       | 10000          | 190.391             | 26                   | 0        |
| 0305_C1_PL5202             | 255412       | 10000          | 192.86              | 21                   | 0        |
| 0305_C1_PL5228             | 96948        | 10000          | 189.055             | 25                   | 0        |
| 0305_C2_PL4570             | 151623       | 10000          | 188.324             | 20                   | 0        |
| 0507_C1_PL4226             | 95765        | 10000          | 167.721             | 12                   | 0        |
| 0507_C1_PL4248             | 136352       | 10000          | 162.775             | 13                   | 0        |
| 0507_C1_PL4249             | 57518        | 10000          | 182.548             | 30                   | 0.001    |
| 0507_C1_PL4283             | 185502       | 10000          | 168.411             | 3                    | 0        |
| 0507_C1_PL4322             | 151527       | 10000          | 177.689             | 22                   | 0        |
| 0507_C1_PL4443             | 177230       | 10000          | 187.3               | 11                   | 0        |
| 0507_C1_PL4671             | 206360       | 10000          | 161.671             | 6                    | 0        |
| 0507_C1_PL4679             | 26770        | 10000          | 175.122             | 33                   | 0.001    |
| 0507_C1_PL4680             | 65094        | 10000          | 156.503             | 20                   | 0        |
| 0507_C1_PL5179             | 80191        | 10000          | 162.743             | 17                   | 0        |
| 0507_C2_MK0390             | 288388       | 10000          | 163.936             | 18                   | 0        |
| 0507_C2_MK0392             | 34881        | 10000          | 168.661             | 34                   | 0.001    |
| 0507_C2_MK0664             | 23098        | 10000          | 191.551             | 16                   | 0.001    |
| 0507_C2_MK0725             | 43435        | 10000          | 176.082             | 23                   | 0.001    |
| 0806_C1_KT4677             | 450542       | 10000          | 194.715             | 22                   | 0        |
| 0806_C1_KT4695             | 601671       | 10000          | 193.328             | 18                   | 0        |
| 0806_C1_KT4715             | 115249       | 10000          | 159.126             | 8                    | 0        |
| 0806_C1_KT4730             | 163832       | 10000          | 190.053             | 18                   | 0        |
| 0806_C1_KT4801             | 63311        | 10000          | 181.414             | 37                   | 0.001    |
| 0806_C1_KT5073             | 385189       | 10000          | 192.098             | 27                   | 0        |

## SM Table 5 Page 2 Residual Primers

|                     |        |       |         |    |       |
|---------------------|--------|-------|---------|----|-------|
| 0806_C1_MK1040      | 37017  | 10000 | 186.817 | 20 | 0.001 |
| 0806_C1_MK1079      | 224813 | 10000 | 182.489 | 6  | 0     |
| 0806_C1_PL7376      | 214565 | 10000 | 188.426 | 29 | 0     |
| 0806_C1_PL7401      | 106246 | 10000 | 185.232 | 31 | 0     |
| 0806_C1_PL7429      | 110505 | 10000 | 184.34  | 32 | 0     |
| 0806_C1_PL7451      | 42020  | 10000 | 182.574 | 31 | 0.001 |
| 0806_C1_PL7496      | 13788  | 10000 | 186.177 | 31 | 0.002 |
| 0806_C1_PL7511      | 177224 | 10000 | 204.646 | 17 | 0     |
| 0806_C1_PL7551      | 154830 | 10000 | 199.097 | 26 | 0     |
| 0806_C2_KT2669      | 33903  | 10000 | 195.885 | 37 | 0.001 |
| 0806_C2_KT2810      | 110254 | 10000 | 193.917 | 12 | 0     |
| 0806_C2_KT4054      | 101160 | 10000 | 191.013 | 25 | 0     |
| 0806_C2_KT4553      | 317323 | 10000 | 197.099 | 36 | 0     |
| 0806_C2_KT4555      | 313915 | 10000 | 198.582 | 20 | 0     |
| 0806_C2_KT4622      | 53650  | 10000 | 195.582 | 27 | 0.001 |
| 0806_C2_KT4631      | 152688 | 10000 | 191.369 | 19 | 0     |
| 0806_C2_KT4663      | 60698  | 10000 | 202.357 | 29 | 0     |
| 0806_C2_PL1387      | 233153 | 10000 | 200.529 | 42 | 0     |
| 0806_C2_PL2101      | 34243  | 10000 | 190.474 | 31 | 0.001 |
| 0806_C2_PL2668      | 201134 | 10000 | 196.372 | 11 | 0     |
| 0806_C2_PL2921      | 401957 | 10000 | 195.824 | 63 | 0     |
| 0807_C1_14729_EMLK  | 113485 | 10000 | 152.02  | 14 | 0     |
| 0807_C1_14743_EMLK  | 184675 | 10000 | 174.838 | 13 | 0     |
| 0807_C1_14748_EMLK  | 179951 | 10000 | 159.179 | 23 | 0     |
| 0807_C1_14750_EMLK  | 112090 | 10000 | 178.333 | 10 | 0     |
| 0807_C1_PL3984      | 26660  | 10000 | 181.116 | 26 | 0.001 |
| 0807_C1_PL4119      | 21393  | 10000 | 178.954 | 41 | 0.002 |
| 0807_C1_PL4121      | 87321  | 10000 | 177.547 | 30 | 0     |
| 0807_C1_PL4123      | 33699  | 10000 | 188.869 | 30 | 0.001 |
| 0807_C1_PL4125      | 31513  | 10000 | 191.025 | 46 | 0.001 |
| 0807_C1_PL4126      | 270577 | 10000 | 185.54  | 12 | 0     |
| 0807_C1_PL4763      | 20006  | 10000 | 183.598 | 38 | 0.002 |
| 0807_C1_PL4784      | 11773  | 10000 | 190.566 | 34 | 0.003 |
| 0807_C1_PL4785      | 45067  | 10000 | 184.786 | 11 | 0     |
| 0807_C1_PL4804      | 104623 | 10000 | 174.049 | 23 | 0     |
| 0807_C1_PL4813      | 78096  | 10000 | 170.231 | 28 | 0     |
| 0807_C1_PL4864      | 73265  | 10000 | 176.667 | 32 | 0     |
| 0807_C1_PL4865      | 81358  | 10000 | 188.768 | 16 | 0     |
| 0807_C1_PL4866      | 119461 | 10000 | 167.937 | 21 | 0     |
| 0807_C1_PL7577      | 75620  | 10000 | 182.837 | 41 | 0.001 |
| 0807_C1_PL8429      | 68849  | 10000 | 189.839 | 47 | 0.001 |
| 0807_C1_PL8486      | 55661  | 10000 | 191.347 | 35 | 0.001 |
| 0807_C1_PL8630      | 124586 | 10000 | 179.559 | 40 | 0     |
| 0807_C2_MK2826      | 228811 | 10000 | 199.965 | 30 | 0     |
| 0809_C1_020484_EMLK | 149022 | 10000 | 197.79  | 10 | 0     |
| 0809_C1_19560_EMLK  | 277907 | 10000 | 201.273 | 5  | 0     |
| 0908_C1_KT7105      | 303738 | 10000 | 206.325 | 18 | 0     |
| 1007_C1_MK1782      | 164392 | 10000 | 184.341 | 10 | 0     |
| 1007_C1_PL4028      | 55984  | 10000 | 180.972 | 39 | 0.001 |
| 1007_C1_PL4059      | 124683 | 10000 | 161.346 | 11 | 0     |
| 1007_C1_PL4094      | 168033 | 10000 | 177.853 | 13 | 0     |
| 1007_C1_PL4187      | 86462  | 10000 | 191.811 | 44 | 0.001 |
| 1007_C1_PL4190      | 191562 | 10000 | 158.687 | 23 | 0     |
| 1007_C1_PL4346      | 297643 | 10000 | 198.158 | 10 | 0     |
| 1007_C2_MK0020      | 342466 | 10000 | 201.39  | 16 | 0     |
| 1007_C2_MK0024      | 12587  | 10000 | 196.413 | 18 | 0.001 |
| 1007_C2_MK0045      | 768158 | 10000 | 202.85  | 37 | 0     |
| 1007_C2_MK0085      | 100159 | 10000 | 197.813 | 31 | 0     |
| 1007_C2_MK0391      | 36775  | 10000 | 175.959 | 36 | 0.001 |
| 1007_C2_MK0607      | 121821 | 10000 | 177.032 | 31 | 0     |
| 1007_C2_MK0894      | 68223  | 10000 | 197.338 | 40 | 0.001 |
| 1007_C2_MK1000      | 193304 | 10000 | 184.401 | 28 | 0     |
| 1007_C2_MK1014      | 904024 | 10000 | 202.85  | 7  | 0     |
| 1007_C2_MK1888      | 19536  | 10000 | 195.948 | 39 | 0.002 |
| 1007_C2_PL4105      | 53099  | 10000 | 173.819 | 11 | 0     |
| 1009_C1_20524_EMLK  | 51293  | 10000 | 177.227 | 18 | 0     |
| 1009_C1_20525_EMLK  | 359698 | 10000 | 185.752 | 4  | 0     |

# SM Table 5 Page 3 Residual Primers

|                     |        |       |         |    |       |
|---------------------|--------|-------|---------|----|-------|
| 1009_C1_20547_EMLK  | 325524 | 10000 | 198.56  | 11 | 0     |
| 1105_C1_MK2405      | 93927  | 10000 | 195.572 | 31 | 0     |
| 1105_C1_MK2427      | 595874 | 10000 | 199.417 | 32 | 0     |
| 1105_C1_MK2431      | 713158 | 10000 | 197.785 | 28 | 0     |
| 1105_C1_MK2436      | 360883 | 10000 | 189.713 | 30 | 0     |
| 1105_C1_MK2673      | 697083 | 10000 | 207.534 | 47 | 0     |
| 1105_C1_MK2790      | 412016 | 10000 | 178.033 | 7  | 0     |
| 1105_C2_MK2334      | 368561 | 10000 | 174.75  | 12 | 0     |
| 1105_C2_MK2369      | 97043  | 10000 | 193.31  | 30 | 0     |
| 1105_C2_MK2370      | 253780 | 10000 | 189.249 | 35 | 0     |
| 1105_C2_MK2371      | 622310 | 10000 | 196.877 | 8  | 0     |
| 1105_C2_MK2383R     | 274991 | 10000 | 187.525 | 12 | 0     |
| 1209_C1_020573_EMLK | 284299 | 10000 | 185.367 | 26 | 0     |
| 1309_C2_MK13013     | 390853 | 10000 | 191.835 | 5  | 0     |
| 1507_C1_13204_EMLH  | 50556  | 10000 | 168.888 | 23 | 0     |
| 1507_C1_13268_EMLH  | 59157  | 10000 | 170.524 | 10 | 0     |
| 1507_C1_13275_EMLH  | 36409  | 10000 | 184.558 | 24 | 0.001 |
| 1507_C1_18538_EMLH  | 84120  | 10000 | 177.551 | 4  | 0     |
| 1507_C1_18596_EMLH  | 37528  | 10000 | 173.125 | 35 | 0.001 |
| 1507_C1_18636_EMLH  | 252561 | 10000 | 173.043 | 6  | 0     |
| 1507_C1_18647_EMLH  | 25358  | 10000 | 182.61  | 38 | 0.001 |
| 1507_C1_18648_EMLH  | 146124 | 10000 | 170.034 | 17 | 0     |
| 1507_C1_18649_EMLH  | 113710 | 10000 | 199.272 | 12 | 0     |
| 1507_C1_18650_EMLH  | 232371 | 10000 | 182.598 | 13 | 0     |
| 1507_C1_18660_EMLH  | 203702 | 10000 | 177.853 | 11 | 0     |
| 1507_C1_18706_EMLH  | 130273 | 10000 | 170.932 | 20 | 0     |
| 1507_C2_15543_EMLK  | 87307  | 10000 | 167.228 | 26 | 0     |
| 1507_C2_15661_EMLK  | 50410  | 10000 | 176.167 | 35 | 0.001 |
| 1507_C2_15674_EMLK  | 131854 | 10000 | 174.352 | 24 | 0     |
| 1507_C2_15686_EMLK  | 48122  | 10000 | 164.998 | 21 | 0     |
| 1507_C2_19521_EMLK  | 62190  | 10000 | 184.403 | 27 | 0     |
| 1507_C2_MK0363      | 143338 | 10000 | 170.879 | 28 | 0     |
| 1507_C2_MK0393      | 72375  | 10000 | 154.584 | 19 | 0     |
| 1507_C2_MK0574      | 67997  | 10000 | 181.586 | 36 | 0.001 |
| 1507_C2_MK0575      | 248564 | 10000 | 164.017 | 12 | 0     |
| 1507_C2_MK0584      | 344074 | 10000 | 198.618 | 5  | 0     |
| 1507_C2_MK0709      | 89472  | 10000 | 175.105 | 22 | 0     |
| 1507_C2_MK0857      | 35269  | 10000 | 190.984 | 32 | 0.001 |
| 1507_C2_MK0864      | 40511  | 10000 | 187.245 | 28 | 0.001 |
| 1507_C2_MK0865      | 239399 | 10000 | 175.107 | 31 | 0     |
| 1507_C2_MK0866      | 64463  | 10000 | 189.817 | 46 | 0.001 |
| 1507_C2_MK0867      | 59134  | 10000 | 169.243 | 30 | 0.001 |
| 1507_C2_MK0868      | 171062 | 10000 | 172.963 | 9  | 0     |
| 1507_C2_MK0869      | 321483 | 10000 | 161.419 | 3  | 0     |
| 1507_C2_MK0879      | 75971  | 10000 | 191.145 | 42 | 0.001 |
| 1507_C2_MK0888      | 93847  | 10000 | 181.156 | 36 | 0     |
| 1507_C2_MK0889      | 281715 | 10000 | 131.151 | 8  | 0     |
| 1507_C2_MK0966      | 44842  | 10000 | 168.096 | 16 | 0     |
| 1706_C1_KT4609      | 398968 | 10000 | 205.924 | 28 | 0     |
| 1706_C1_PL7604      | 465840 | 10000 | 199.825 | 20 | 0     |
| 1706_C1_PL7605      | 67905  | 10000 | 194.178 | 26 | 0     |
| 1706_C1_PL7626      | 743962 | 10000 | 197.333 | 4  | 0     |
| 1706_C1_PL7678      | 96548  | 10000 | 190.635 | 22 | 0     |
| 1706_C1_PL7685      | 144707 | 10000 | 198.973 | 22 | 0     |
| 1706_C1_PL7709      | 504415 | 10000 | 204.282 | 20 | 0     |
| 1706_C1_PL7773      | 120218 | 10000 | 190.539 | 18 | 0     |
| 1706_C1_PL7774      | 79634  | 10000 | 196.512 | 38 | 0     |
| 1706_C1_PL7775      | 19500  | 10000 | 187.336 | 30 | 0.002 |
| 1706_C1_PL7792      | 228177 | 10000 | 204.908 | 45 | 0     |
| 1706_C1_PL7801      | 109036 | 10000 | 187.455 | 53 | 0     |
| 1706_C1_PL7820      | 59279  | 10000 | 188.3   | 69 | 0.001 |
| 1708_C1_12634_EMLH  | 59817  | 10000 | 193.093 | 30 | 0.001 |
| 1708_C1_12705_EMLH  | 46987  | 10000 | 194.134 | 33 | 0.001 |
| 1708_C1_13031_EMLH  | 182079 | 10000 | 203.149 | 27 | 0     |
| 1708_C1_MK0367R     | 22044  | 10000 | 202.139 | 35 | 0.002 |
| 1708_C1_MK0369R     | 201680 | 10000 | 197.852 | 30 | 0     |
| 1708_C1_MK0375R     | 308366 | 10000 | 200.273 | 27 | 0     |

## SM Table 5 Page 4 Residual Primers

|                    |        |       |         |    |             |
|--------------------|--------|-------|---------|----|-------------|
| 1708_C1_MK0379R    | 125516 | 10000 | 196.003 | 44 | 0           |
| 1708_C1_MK0384R    | 489273 | 10000 | 204.995 | 21 | 0           |
| 1708_C1_MK0388R    | 64101  | 10000 | 200.151 | 33 | 0.001       |
| 1708_C1_MK0425R    | 518505 | 10000 | 207.57  | 23 | 0           |
| 1708_C1_MK0431R    | 76804  | 10000 | 198.069 | 26 | 0           |
| 1708_C1_MK0491R    | 26719  | 10000 | 200.569 | 24 | 0.001       |
| 1708_C1_MK0531R    | 142807 | 10000 | 201.012 | 38 | 0           |
| 1708_C1_MK0533R    | 8031   | 8031  | 210.743 | 30 | 0.003735525 |
| 1708_C1_MK0592R    | 66133  | 10000 | 201.561 | 40 | 0.001       |
| 1708_C1_MK0704R    | 24714  | 10000 | 201.461 | 35 | 0.001       |
| 1708_C1_MK0723R    | 249376 | 10000 | 196.669 | 18 | 0           |
| 1708_C1_MK0766R    | 24376  | 10000 | 201.16  | 33 | 0.001       |
| 1708_C1_MK0849R    | 356029 | 10000 | 207.131 | 24 | 0           |
| 1708_C2_MK1036R    | 115367 | 10000 | 199.926 | 18 | 0           |
| 1708_C2_MK1156R    | 214301 | 10000 | 200.094 | 19 | 0           |
| 1708_C2_MK2008R2   | 196879 | 10000 | 184.262 | 9  | 0           |
| 1708_C2_MK2282R    | 66449  | 10000 | 205.054 | 35 | 0.001       |
| 1708_C2_MK2283R    | 224606 | 10000 | 203.49  | 26 | 0           |
| 1708_C2_MK2307R    | 24704  | 10000 | 204.165 | 30 | 0.001       |
| 1708_C2_MK2506R    | 137888 | 10000 | 199.322 | 27 | 0           |
| 1708_C2_MK2656R2   | 38012  | 10000 | 201.334 | 39 | 0.001       |
| 1708_C2_MK2717R    | 122486 | 10000 | 205.316 | 40 | 0           |
| 1708_C2_MK2900R2   | 26837  | 10000 | 199.143 | 24 | 0.001       |
| 1804_C1_MK2570     | 185701 | 10000 | 195.327 | 9  | 0           |
| 1805_C1_MK2255     | 145991 | 10000 | 191.281 | 26 | 0           |
| 1805_C1_MK2341     | 142325 | 10000 | 191.594 | 9  | 0           |
| 1805_C1_MK2382     | 29678  | 10000 | 189.539 | 31 | 0.001       |
| 1805_C1_MK2395     | 60770  | 10000 | 189.302 | 21 | 0           |
| 1805_C1_MK2397     | 170588 | 10000 | 191.783 | 7  | 0           |
| 1805_C1_MK2398     | 69078  | 10000 | 189.909 | 25 | 0           |
| 1805_C1_MK2710     | 125091 | 10000 | 188.216 | 17 | 0           |
| 1805_C1_MK2724     | 92113  | 10000 | 194.028 | 28 | 0           |
| 1805_C1_MK2788     | 68407  | 10000 | 197.819 | 28 | 0           |
| 1805_C1_MK2825     | 191558 | 10000 | 196.275 | 24 | 0           |
| 1805_C1_MK3043     | 155025 | 10000 | 202.846 | 25 | 0           |
| 1805_C1_MK3462     | 42655  | 10000 | 193.297 | 38 | 0.001       |
| 1805_C1_MK3479     | 36357  | 10000 | 195.659 | 41 | 0.001       |
| 1807_C1_14859_EMLK | 24991  | 10000 | 202.833 | 28 | 0.001       |
| 1807_C1_14888_EMLK | 65057  | 10000 | 189.951 | 20 | 0           |
| 1807_C1_15000_EMLK | 80953  | 10000 | 194.517 | 11 | 0           |
| 1807_C1_15274_EMLK | 71375  | 10000 | 175.97  | 20 | 0           |
| 1807_C1_15314_EMLK | 120918 | 10000 | 207.226 | 32 | 0           |
| 1807_C1_15323_EMLK | 38768  | 10000 | 203.808 | 36 | 0.001       |
| 1807_C1_15327_EMLK | 48830  | 10000 | 204.52  | 29 | 0.001       |
| 1807_C1_15338_EMLK | 231369 | 10000 | 208.696 | 23 | 0           |
| 1807_C1_15349_EMLK | 84380  | 10000 | 202.221 | 28 | 0           |
| 1807_C1_15360_EMLK | 59357  | 10000 | 201.453 | 36 | 0.001       |
| 1807_C1_15373_EMLK | 62752  | 10000 | 198.668 | 20 | 0           |
| 1807_C1_15421_EMLK | 32472  | 10000 | 189.782 | 34 | 0.001       |
| 1807_C1_15470_EMLK | 76280  | 10000 | 180.309 | 30 | 0           |
| 1807_C1_77724_EMLK | 41446  | 10000 | 170.488 | 9  | 0           |
| 1807_C1_MK0464     | 95209  | 10000 | 172.158 | 58 | 0.001       |
| 1807_C1_MK0551     | 237743 | 10000 | 170.778 | 29 | 0           |
| 1807_C1_PL8310     | 350515 | 10000 | 204.722 | 28 | 0           |
| 1807_C1_PL8780     | 407439 | 10000 | 208.655 | 27 | 0           |
| 1807_C1_PL8896     | 53773  | 10000 | 206.939 | 56 | 0.001       |
| 1807_C1_PL9150R    | 427699 | 10000 | 204.333 | 28 | 0           |
| 1807_C1_PL9192R    | 40559  | 10000 | 208.202 | 4  | 0           |
| 1807_C1_PL9199R    | 513160 | 10000 | 192.601 | 13 | 0           |
| 1807_C2_10354_EMLK | 119074 | 10000 | 191.043 | 36 | 0           |
| 1807_C2_10356_EMLK | 66174  | 10000 | 195.316 | 24 | 0           |
| 1807_C2_10394_EMLK | 47003  | 10000 | 202.441 | 27 | 0.001       |
| 1807_C2_10398_EMLK | 130871 | 10000 | 195.93  | 45 | 0           |
| 1807_C2_10402_EMLK | 90537  | 10000 | 193.257 | 30 | 0           |
| 1807_C2_10415_EMLK | 83915  | 10000 | 196.611 | 19 | 0           |
| 1807_C2_10454_EMLK | 96266  | 10000 | 179.083 | 17 | 0           |
| 1807_C2_10455_EMLK | 120057 | 10000 | 196.697 | 22 | 0           |

## SM Table 5 Page 5 Residual Primers

|                     |        |       |         |    |             |
|---------------------|--------|-------|---------|----|-------------|
| 1807_C2_14521_EMLK  | 244813 | 10000 | 201.405 | 14 | 0           |
| 1807_C2_14549_EMLK  | 173117 | 10000 | 188.044 | 9  | 0           |
| 1807_C2_14687_EMLK  | 78598  | 10000 | 200.965 | 18 | 0           |
| 1807_C2_14723_EMLK  | 131338 | 10000 | 200.826 | 19 | 0           |
| 1807_C2_14749_EMLK  | 85107  | 10000 | 171.407 | 11 | 0           |
| 1807_C2_14763_EMLK  | 118908 | 10000 | 207.081 | 24 | 0           |
| 1807_C2_14776_EMLK  | 70981  | 10000 | 206.346 | 38 | 0.001       |
| 1807_C2_14782_EMLK  | 143320 | 10000 | 206.364 | 35 | 0           |
| 1807_C2_14795_EMLK  | 90333  | 10000 | 200.939 | 22 | 0           |
| 1807_C2_14830_EMLK  | 226244 | 10000 | 197.644 | 27 | 0           |
| 1807_C2_14846_EMLK  | 62760  | 10000 | 201.872 | 29 | 0           |
| 2005_C2_PL6656      | 51713  | 10000 | 191.946 | 38 | 0.001       |
| 2005_C2_PL7053      | 40617  | 10000 | 188.275 | 35 | 0.001       |
| 2005_C2_PL7055      | 19260  | 10000 | 189.814 | 28 | 0.001       |
| 2104_C1_MK2342      | 893472 | 10000 | 193.554 | 23 | 0           |
| 2104_C1_MK2343      | 430741 | 10000 | 183.377 | 14 | 0           |
| 2104_C1_MK2344      | 748037 | 10000 | 185.338 | 26 | 0           |
| 2104_C1_MK2362      | 327017 | 10000 | 185.701 | 18 | 0           |
| 2104_C1_MK2364      | 253279 | 10000 | 189.52  | 36 | 0           |
| 2104_C1_MK2365      | 497785 | 10000 | 187.667 | 18 | 0           |
| 2104_C1_MK2367      | 327903 | 10000 | 190.646 | 20 | 0           |
| 2104_C1_MK2437      | 369443 | 10000 | 188.604 | 21 | 0           |
| 2104_C1_MK2449      | 181505 | 10000 | 193.328 | 34 | 0           |
| 2104_C2_MK2366      | 185059 | 10000 | 187.277 | 14 | 0           |
| 2104_C2_MK2447      | 559412 | 10000 | 193.601 | 8  | 0           |
| 2104_C2_MK2448      | 339427 | 10000 | 187.637 | 22 | 0           |
| 2104_C2_MK2850R     | 102448 | 10000 | 187.496 | 23 | 0           |
| 2104_C2_MK2938      | 201839 | 10000 | 189.332 | 23 | 0           |
| 2104_C2_MK2983      | 211071 | 10000 | 189.039 | 23 | 0           |
| 2104_C2_MK3050      | 96197  | 10000 | 191.023 | 38 | 0           |
| 2104_C2_MK4165      | 404083 | 10000 | 192.955 | 19 | 0           |
| 2208_C1_MK0433R2    | 11760  | 10000 | 202.224 | 28 | 0.002       |
| 2208_C1_MK0434R2    | 21674  | 10000 | 201.99  | 35 | 0.002       |
| 2208_C1_MK0549R2    | 9586   | 9586  | 211.804 | 28 | 0.002920926 |
| 2208_C1_MK2789R3    | 40648  | 10000 | 205.534 | 32 | 0.001       |
| 2208_C1_MK2918R     | 240086 | 10000 | 207.838 | 44 | 0           |
| 2208_C1_MK3183R2    | 196607 | 10000 | 203.874 | 12 | 0           |
| 2208_C1_PL4127R     | 103879 | 10000 | 203.491 | 27 | 0           |
| 2208_C1_PL4169R     | 77758  | 10000 | 204.196 | 32 | 0           |
| 2208_C1_PL4197R     | 106602 | 10000 | 208.071 | 39 | 0           |
| 2208_C1_PL4203R     | 63475  | 10000 | 203.095 | 25 | 0           |
| 2208_C1_PL4256R     | 315032 | 10000 | 199.12  | 26 | 0           |
| 2208_C1_PL4284R     | 46676  | 10000 | 203.811 | 35 | 0.001       |
| 2208_C1_PL4292R     | 201142 | 10000 | 201.884 | 40 | 0           |
| 2208_C1_PL4432R     | 47167  | 10000 | 202.881 | 20 | 0           |
| 2208_C1_PL4736R     | 60127  | 10000 | 203.019 | 26 | 0           |
| 2208_C2_12615_EMLH  | 79710  | 10000 | 201.759 | 22 | 0           |
| 2208_C2_15207R_EMLK | 39829  | 10000 | 199.561 | 28 | 0.001       |
| 2208_C2_15438R_EMLK | 67263  | 10000 | 201.487 | 42 | 0.001       |
| 2208_C2_18638R_EMLH | 67866  | 10000 | 202.25  | 16 | 0           |
| 2208_C2_18642R_EMLH | 152575 | 10000 | 200.094 | 14 | 0           |
| 2208_C2_18659R_EMLH | 64864  | 10000 | 204.593 | 41 | 0.001       |
| 2208_C2_18687R_EMLH | 80798  | 10000 | 204.895 | 17 | 0           |
| 2208_C2_19560R_EMLK | 112044 | 10000 | 203.824 | 29 | 0           |
| 2208_C2_356_EMLH    | 16439  | 10000 | 205.212 | 29 | 0.002       |
| 2208_C2_651_EMLH    | 46490  | 10000 | 203.124 | 46 | 0.001       |
| 2208_C2_75711_EMLH  | 69669  | 10000 | 202.709 | 34 | 0           |
| 2208_C2_75722_EMLH  | 230514 | 10000 | 202.228 | 20 | 0           |
| 2208_C2_75731_EMLH  | 29257  | 10000 | 198.627 | 45 | 0.002       |
| 2208_C2_75779_EMLH  | 41534  | 10000 | 202.029 | 42 | 0.001       |
| 2208_C2_762_EMLH    | 29589  | 10000 | 201.406 | 33 | 0.001       |
| 2208_C2_PL7483R     | 100825 | 10000 | 200.271 | 33 | 0           |
| 2208_C2_PL7834R2    | 44307  | 10000 | 197.974 | 27 | 0.001       |
| 2507_C1_10012_EMLK  | 77775  | 10000 | 192.881 | 18 | 0           |
| 2507_C1_10022_EMLK  | 50196  | 10000 | 191.786 | 24 | 0           |
| 2507_C1_10023_EMLK  | 592308 | 10000 | 196.023 | 9  | 0           |
| 2507_C1_10025_EMLK  | 117149 | 10000 | 200.643 | 20 | 0           |

## SM Table 5 Page 6 Residual Primers

|                    |        |       |         |    |       |
|--------------------|--------|-------|---------|----|-------|
| 2507_C1_77725_EMLK | 58853  | 10000 | 195.911 | 47 | 0.001 |
| 2507_C1_77727_EMLK | 126912 | 10000 | 187.45  | 15 | 0     |
| 2507_C1_77737_EMLK | 102149 | 10000 | 196.288 | 27 | 0     |
| 2507_C1_77742_EMLK | 136885 | 10000 | 193.705 | 28 | 0     |
| 2507_C1_77746_EMLK | 200956 | 10000 | 185.115 | 20 | 0     |
| 2507_C1_77747_EMLK | 109374 | 10000 | 194.279 | 26 | 0     |
| 2507_C1_77748_EMLK | 201977 | 10000 | 186.247 | 22 | 0     |
| 2507_C1_77749_EMLK | 61108  | 10000 | 200.867 | 43 | 0.001 |
| 2507_C1_77750_EMLK | 607706 | 10000 | 200.244 | 27 | 0     |
| 2507_C1_77751_EMLK | 525260 | 10000 | 195.602 | 9  | 0     |
| 2507_C1_77753_EMLK | 166888 | 10000 | 192.592 | 19 | 0     |
| 2507_C1_77756_EMLK | 213934 | 10000 | 180.191 | 7  | 0     |
| 2507_C1_77767_EMLK | 50576  | 10000 | 194.771 | 39 | 0.001 |
| 2507_C1_77768_EMLK | 35831  | 10000 | 199.527 | 29 | 0.001 |
| 2507_C1_77795_EMLK | 72874  | 10000 | 199.407 | 12 | 0     |
| 2507_C1_MK8878     | 217200 | 10000 | 194.085 | 8  | 0     |
| 2507_C2_10027_EMLK | 57128  | 10000 | 204.217 | 42 | 0.001 |
| 2507_C2_10038_EMLK | 264053 | 10000 | 195.62  | 20 | 0     |
| 2507_C2_10040_EMLK | 125209 | 10000 | 194.105 | 29 | 0     |
| 2507_C2_10049_EMLK | 51460  | 10000 | 196.903 | 23 | 0     |
| 2507_C2_10065_EMLK | 32078  | 10000 | 197.365 | 26 | 0.001 |
| 2507_C2_10066_EMLK | 159762 | 10000 | 202.386 | 28 | 0     |
| 2507_C2_10080_EMLK | 365161 | 10000 | 205.358 | 42 | 0     |
| 2507_C2_10082_EMLK | 71503  | 10000 | 191.869 | 35 | 0     |
| 2507_C2_10084_EMLK | 32189  | 10000 | 205.987 | 33 | 0.001 |
| 2507_C2_10112_EMLK | 63861  | 10000 | 198.08  | 34 | 0.001 |
| 2507_C2_10113_EMLK | 81328  | 10000 | 202.484 | 30 | 0     |
| 2507_C2_10123_EMLK | 59991  | 10000 | 193.667 | 8  | 0     |
| 2507_C2_10132_EMLK | 58777  | 10000 | 203.675 | 18 | 0     |
| 2507_C2_10134_EMLK | 118417 | 10000 | 200.38  | 8  | 0     |
| 2507_C2_10142_EMLK | 23794  | 10000 | 200.545 | 32 | 0.001 |
| 2507_C2_10212_EMLK | 272964 | 10000 | 206.516 | 23 | 0     |
| 2507_C2_10244_EMLK | 256847 | 10000 | 205.506 | 35 | 0     |
| 2507_C2_10247_EMLK | 31205  | 10000 | 199.524 | 37 | 0.001 |
| 2507_C2_10248_EMLK | 135138 | 10000 | 204.203 | 40 | 0     |
| 2507_C2_10278_EMLK | 30387  | 10000 | 201.825 | 31 | 0.001 |
| 2507_C2_10352_EMLK | 61828  | 10000 | 204.847 | 42 | 0.001 |
| 2507_C2_10353_EMLK | 30282  | 10000 | 201.323 | 27 | 0.001 |
| 2507_C2_77722_EMLK | 120307 | 10000 | 189.518 | 27 | 0     |
| 2507_C2_77723_EMLK | 180695 | 10000 | 204.417 | 16 | 0     |
| 2605_C1_MK0885     | 221035 | 10000 | 160.929 | 9  | 0     |
| 2605_C1_MK1197     | 447490 | 10000 | 137.223 | 9  | 0     |
| 2605_C1_MK1202     | 222197 | 10000 | 148.747 | 4  | 0     |
| 2605_C1_MK1320     | 95463  | 10000 | 114.618 | 11 | 0     |
| 2605_C2_KT5226     | 193171 | 10000 | 184.594 | 22 | 0     |
| 2605_C2_KT5233     | 151897 | 10000 | 185.181 | 17 | 0     |
| 2605_C2_KT5243     | 163152 | 10000 | 177.135 | 11 | 0     |
| 2605_C2_PL5133R    | 228810 | 10000 | 199.402 | 22 | 0     |
| 2605_C2_PL5275     | 273300 | 10000 | 178.901 | 21 | 0     |
| 2605_C2_PL5534     | 174124 | 10000 | 173.146 | 32 | 0     |
| 2605_C2_PL7136b    | 147754 | 10000 | 187.734 | 33 | 0     |
| 2607_C1_12004_EMLH | 18862  | 10000 | 201.234 | 27 | 0.001 |
| 2607_C1_12106_EMLH | 413694 | 10000 | 209.701 | 24 | 0     |
| 2607_C1_12112_EMLH | 41428  | 10000 | 200.838 | 29 | 0.001 |
| 2607_C1_12161_EMLH | 569287 | 10000 | 209.536 | 23 | 0     |
| 2607_C1_12178_EMLH | 185235 | 10000 | 199.949 | 21 | 0     |
| 2607_C1_12179_EMLH | 148493 | 10000 | 201.507 | 40 | 0     |
| 2607_C1_592_EMLH   | 42335  | 10000 | 200.978 | 41 | 0.001 |
| 2607_C1_611_EMLH   | 58898  | 10000 | 206.249 | 57 | 0.001 |
| 2607_C1_614_EMLH   | 245358 | 10000 | 206.386 | 42 | 0     |
| 2607_C1_632_EMLH   | 77426  | 10000 | 199.246 | 54 | 0.001 |
| 2607_C1_634_EMLH   | 34251  | 10000 | 201.679 | 40 | 0.001 |
| 2607_C1_704_EMLH   | 53610  | 10000 | 203.421 | 48 | 0.001 |
| 2607_C1_705_EMLH   | 109007 | 10000 | 204.896 | 35 | 0     |
| 2607_C1_731_EMLH   | 61447  | 10000 | 199.621 | 33 | 0.001 |
| 2607_C1_732_EMLH   | 79835  | 10000 | 198.532 | 34 | 0     |
| 2607_C1_735_EMLH   | 98639  | 10000 | 199.683 | 23 | 0     |

## SM Table 5 Page 7 Residual Primers

|                    |        |       |         |    |            |
|--------------------|--------|-------|---------|----|------------|
| 2607_C1_741_EMLH   | 114916 | 10000 | 203.452 | 37 | 0          |
| 2607_C1_793_EMLH   | 185393 | 10000 | 206.002 | 22 | 0          |
| 2607_C1_PL4022R    | 215639 | 10000 | 202.709 | 10 | 0          |
| 2607_C1_PL4052R    | 262122 | 10000 | 200.4   | 14 | 0          |
| 2607_C1_PL4330R    | 180414 | 10000 | 178.291 | 20 | 0          |
| 2607_C2_12180_EMLH | 319546 | 10000 | 206.792 | 42 | 0          |
| 2607_C2_12181_EMLH | 41708  | 10000 | 180.847 | 20 | 0          |
| 2607_C2_12189_EMLH | 162376 | 10000 | 204.149 | 24 | 0          |
| 2607_C2_12192_EMLH | 230552 | 10000 | 207.925 | 26 | 0          |
| 2607_C2_12193_EMLH | 75392  | 10000 | 205.678 | 36 | 0          |
| 2607_C2_12229_EMLH | 27718  | 10000 | 205.653 | 33 | 0.001      |
| 2607_C2_12242_EMLH | 290627 | 10000 | 208.74  | 36 | 0          |
| 2607_C2_12257_EMLH | 152968 | 10000 | 207.98  | 44 | 0          |
| 2607_C2_12275_EMLH | 110656 | 10000 | 202.955 | 28 | 0          |
| 2607_C2_12600_EMLH | 62762  | 10000 | 203.494 | 28 | 0          |
| 2607_C2_12628_EMLH | 49443  | 10000 | 201.285 | 24 | 0          |
| 2607_C2_12666_EMLH | 100021 | 10000 | 201.598 | 27 | 0          |
| 2607_C2_12757_EMLH | 82780  | 10000 | 195.687 | 23 | 0          |
| 2607_C2_12767_EMLH | 26165  | 10000 | 191.399 | 36 | 0.001      |
| 2607_C2_12781_EMLH | 206733 | 10000 | 207.757 | 36 | 0          |
| 2607_C2_12851_EMLH | 61558  | 10000 | 204.482 | 37 | 0.001      |
| 2607_C2_12854_EMLH | 99764  | 10000 | 204.234 | 16 | 0          |
| 2607_C2_12855_EMLH | 66055  | 10000 | 204.55  | 33 | 0          |
| 2607_C2_12872_EMLH | 67969  | 10000 | 203.561 | 29 | 0          |
| 2607_C2_12916_EMLH | 15460  | 10000 | 205.359 | 43 | 0.003      |
| 2607_C2_12934_EMLH | 95022  | 10000 | 205.073 | 29 | 0          |
| 2607_C2_12936_EMLH | 355945 | 10000 | 203.086 | 15 | 0          |
| 2807_C1_361_EMLH   | 117414 | 10000 | 197.73  | 29 | 0          |
| 2807_C1_362_EMLH   | 368080 | 10000 | 203.49  | 27 | 0          |
| 2807_C1_375_EMLH   | 71983  | 10000 | 202.578 | 29 | 0          |
| 2807_C1_380_EMLH   | 85794  | 10000 | 200.177 | 23 | 0          |
| 2807_C1_389_EMLH   | 101031 | 10000 | 194.729 | 29 | 0          |
| 2807_C1_402_EMLH   | 88031  | 10000 | 200.475 | 28 | 0          |
| 2807_C1_405_EMLH   | 62417  | 10000 | 200.537 | 25 | 0          |
| 2807_C1_408_EMLH   | 547057 | 10000 | 204.766 | 14 | 0          |
| 2807_C1_413_EMLH   | 562050 | 10000 | 205.375 | 20 | 0          |
| 2807_C1_466_EMLH   | 185891 | 10000 | 193.148 | 16 | 0          |
| 2807_C1_468_EMLH   | 242827 | 10000 | 198.021 | 11 | 0          |
| 2807_C1_470_EMLH   | 175225 | 10000 | 188.978 | 7  | 0          |
| 2807_C1_473_EMLH   | 84258  | 10000 | 188.757 | 13 | 0          |
| 2807_C1_480_EMLH   | 484971 | 10000 | 206.229 | 26 | 0          |
| 2807_C1_75674_EMLH | 23216  | 10000 | 201.586 | 26 | 0.001      |
| 2807_C1_75685_EMLH | 51997  | 10000 | 199.01  | 26 | 0.001      |
| 2807_C1_75688_EMLH | 7808   | 7808  | 208.565 | 24 | 0.00307377 |
| 2807_C1_75705_EMLH | 107962 | 10000 | 201.136 | 39 | 0          |
| 2807_C1_75707_EMLH | 51934  | 10000 | 197.701 | 27 | 0.001      |
| 2807_C1_75727_EMLH | 114209 | 10000 | 201.013 | 43 | 0          |
| 2807_C1_75728_EMLH | 131335 | 10000 | 200.795 | 37 | 0          |
| 2807_C1_75750_EMLH | 437301 | 10000 | 204.197 | 20 | 0          |
| 2807_C1_75789_EMLH | 55158  | 10000 | 199.371 | 41 | 0.001      |
| 2807_C2_489_EMLH   | 145368 | 10000 | 203.442 | 37 | 0          |
| 2807_C2_490_EMLH   | 74468  | 10000 | 200.092 | 23 | 0          |
| 2807_C2_491_EMLH   | 103457 | 10000 | 201.013 | 19 | 0          |
| 2807_C2_505_EMLH   | 104586 | 10000 | 201.784 | 36 | 0          |
| 2807_C2_508_EMLH   | 47171  | 10000 | 202.115 | 24 | 0.001      |
| 2807_C2_511_EMLH   | 73060  | 10000 | 199.729 | 46 | 0.001      |
| 2807_C2_518_EMLH   | 79283  | 10000 | 201.693 | 34 | 0          |
| 2807_C2_539_EMLH   | 147054 | 10000 | 199.011 | 33 | 0          |
| 2807_C2_554_EMLH   | 48415  | 10000 | 201.394 | 36 | 0.001      |
| 2807_C2_567_EMLH   | 72177  | 10000 | 193.605 | 38 | 0.001      |
| 2807_C2_77685_EMLK | 124011 | 10000 | 182.857 | 29 | 0          |
| 2807_C2_77687_EMLK | 272302 | 10000 | 160.587 | 14 | 0          |
| 2807_C2_77688_EMLK | 179661 | 10000 | 187.308 | 32 | 0          |
| 2807_C2_77693_EMLK | 258868 | 10000 | 204.303 | 18 | 0          |
| 2807_C2_77696_EMLK | 49063  | 10000 | 202.895 | 38 | 0.001      |
| 2807_C2_77706_EMLK | 186953 | 10000 | 201.322 | 35 | 0          |
| 2807_C2_77710_EMLK | 75698  | 10000 | 204.539 | 30 | 0          |

## SM Table 5 Page 8 Residual Primers

|                    |        |       |         |    |       |
|--------------------|--------|-------|---------|----|-------|
| 2807_C2_77711_EMLK | 47926  | 10000 | 197.146 | 24 | 0.001 |
| 2807_C2_77712_EMLK | 74644  | 10000 | 196.548 | 36 | 0     |
| 2807_C2_77716_EMLK | 120716 | 10000 | 197.578 | 21 | 0     |
| 2807_C2_MK1355R    | 220943 | 10000 | 125.712 | 8  | 0     |
| 2906_C1_PL4194     | 123385 | 10000 | 186.248 | 9  | 0     |
| 2906_C1_PL4347     | 207724 | 10000 | 190.95  | 2  | 0     |
| 2906_C1_PL4483     | 85992  | 10000 | 167.789 | 29 | 0     |
| 2906_C1_PL4561     | 118616 | 10000 | 168.927 | 9  | 0     |
| 2906_C1_PL4569     | 80107  | 10000 | 173.457 | 23 | 0     |
| 2906_C1_PL4872     | 158466 | 10000 | 183.429 | 17 | 0     |
| 2906_C1_PL4886     | 280791 | 10000 | 194.069 | 15 | 0     |
| 2906_C1_PL5001     | 252347 | 10000 | 186.411 | 14 | 0     |
| 2906_C1_PL5019     | 86999  | 10000 | 183.444 | 41 | 0     |
| 2906_C1_PL5099     | 51704  | 10000 | 192.769 | 33 | 0.001 |
| 2906_C1_PL5157     | 220430 | 10000 | 187.977 | 6  | 0     |
| 2906_C1_PL7689     | 59873  | 10000 | 188.383 | 41 | 0.001 |
| 2906_C1_PL7946     | 34263  | 10000 | 188.967 | 43 | 0.001 |
| 2906_C1_PL7947     | 90837  | 10000 | 167.123 | 16 | 0     |
| 2906_C1_PL8128     | 131192 | 10000 | 162.462 | 21 | 0     |

## SM Table 5 Page 9 Residual Primers

|                    |        |       |         |    |       |
|--------------------|--------|-------|---------|----|-------|
| 2906_C1_PL8172     | 333390 | 10000 | 191.528 | 10 | 0     |
| 2906_C2_KT5034     | 65688  | 10000 | 181.338 | 44 | 0.001 |
| 2906_C2_KT5786     | 63626  | 10000 | 187.426 | 22 | 0     |
| 2906_C2_MK0364     | 40165  | 10000 | 184.989 | 42 | 0.001 |
| 2906_C2_MK0365     | 81653  | 10000 | 171.956 | 15 | 0     |
| 2906_C2_MK0366     | 64350  | 10000 | 198.162 | 33 | 0.001 |
| 2906_C2_MK0368     | 102596 | 10000 | 178.44  | 22 | 0     |
| 3004_C1_KT5734     | 246053 | 10000 | 191.441 | 10 | 0     |
| 3004_C1_KT5738     | 324360 | 10000 | 190.494 | 27 | 0     |
| 3004_C1_KT5787     | 396633 | 10000 | 201.652 | 20 | 0     |
| 3004_C1_KT5788     | 299958 | 10000 | 198.774 | 27 | 0     |
| 3004_C1_KT5789     | 90155  | 10000 | 195.234 | 29 | 0     |
| 3004_C1_KT5832     | 105976 | 10000 | 193.786 | 32 | 0     |
| 3004_C1_KT5858     | 125483 | 10000 | 191.85  | 33 | 0     |
| 3004_C1_KT5859     | 279090 | 10000 | 171.038 | 3  | 0     |
| 3004_C1_KT5974     | 292338 | 10000 | 197.094 | 1  | 0     |
| 3004_C2_KT5214     | 203664 | 10000 | 201.927 | 23 | 0     |
| 3004_C2_KT5224     | 206475 | 10000 | 189.142 | 16 | 0     |
| 3004_C2_KT5225     | 284964 | 10000 | 189.025 | 29 | 0     |
| 3004_C2_KT5249     | 314432 | 10000 | 187.016 | 16 | 0     |
| 3004_C2_KT5317     | 280475 | 10000 | 192.747 | 17 | 0     |
| 3004_C2_KT5320     | 173431 | 10000 | 188.81  | 20 | 0     |
| 3004_C2_KT5382     | 131310 | 10000 | 191.24  | 30 | 0     |
| 3004_C2_KT5388     | 226424 | 10000 | 190.015 | 25 | 0     |
| 3004_C2_KT5486     | 256912 | 10000 | 192.705 | 25 | 0     |
| 3004_C2_KT5542     | 421720 | 10000 | 199.853 | 15 | 0     |
| 3007_C1_12578_EMLH | 214299 | 10000 | 208.041 | 26 | 0     |
| 3007_C1_12579_EMLH | 126826 | 10000 | 204.694 | 26 | 0     |
| 3007_C1_12580_EMLH | 55608  | 10000 | 199.535 | 21 | 0     |
| 3007_C1_13247_EMLH | 195284 | 10000 | 202.067 | 12 | 0     |
| 3007_C1_442_EMLH   | 49358  | 10000 | 206.302 | 16 | 0     |
| 3007_C1_443_EMLH   | 114621 | 10000 | 208.018 | 34 | 0     |
| 3007_C1_448_EMLH   | 57523  | 10000 | 205.661 | 34 | 0.001 |
| 3007_C1_75708_EMLH | 31877  | 10000 | 202.166 | 27 | 0.001 |
| 3007_C1_77524_EMLK | 32271  | 10000 | 196.028 | 32 | 0.001 |
| 3007_C1_77525_EMLK | 480060 | 10000 | 192.124 | 14 | 0     |
| 3007_C1_77526_EMLK | 191868 | 10000 | 182.562 | 8  | 0     |
| 3007_C1_77529_EMLK | 213668 | 10000 | 184.543 | 9  | 0     |
| 3007_C1_77549_EMLK | 13079  | 10000 | 200.447 | 37 | 0.003 |
| 3007_C1_77551_EMLK | 45037  | 10000 | 196.941 | 36 | 0.001 |
| 3007_C1_77558_EMLK | 66918  | 10000 | 197.239 | 26 | 0     |
| 3007_C1_77563_EMLK | 114798 | 10000 | 195.497 | 23 | 0     |
| 3007_C1_77572_EMLK | 38845  | 10000 | 191.18  | 35 | 0.001 |
| 3007_C1_KT7095     | 57647  | 10000 | 204.513 | 22 | 0     |
| 3007_C1_MK9396     | 225608 | 10000 | 194.986 | 28 | 0     |
| 3007_C2_77573_EMLK | 262355 | 10000 | 203.94  | 6  | 0     |
| 3007_C2_77574_EMLK | 45452  | 10000 | 195.98  | 36 | 0.001 |
| 3007_C2_77577_EMLK | 12640  | 10000 | 198.453 | 33 | 0.003 |
| 3007_C2_77578_EMLK | 28853  | 10000 | 192.535 | 27 | 0.001 |
| 3007_C2_77580_EMLK | 23794  | 10000 | 187.767 | 18 | 0.001 |
| 3007_C2_77581_EMLK | 46384  | 10000 | 188.159 | 18 | 0     |
| 3007_C2_77582_EMLK | 356109 | 10000 | 196.32  | 4  | 0     |
| 3007_C2_77585_EMLK | 25666  | 10000 | 192.287 | 17 | 0.001 |
| 3007_C2_77588_EMLK | 38145  | 10000 | 197.588 | 21 | 0.001 |
| 3007_C2_77589_EMLK | 111964 | 10000 | 193.809 | 12 | 0     |
| 3007_C2_77591_EMLK | 83638  | 10000 | 193.05  | 26 | 0     |
| 3007_C2_77594_EMLK | 274815 | 10000 | 187.587 | 7  | 0     |
| 3007_C2_77601_EMLK | 61587  | 10000 | 195.345 | 18 | 0     |
| 3007_C2_77612_EMLK | 135637 | 10000 | 195.226 | 12 | 0     |
| 3007_C2_77613_EMLK | 60046  | 10000 | 200.256 | 42 | 0.001 |
| 3007_C2_77615_EMLK | 78394  | 10000 | 201.533 | 28 | 0     |
| 3007_C2_77630_EMLK | 27167  | 10000 | 197.848 | 33 | 0.001 |
| 3007_C2_77632_EMLK | 29913  | 10000 | 200.165 | 32 | 0.001 |
| 3007_C2_77643_EMLK | 50762  | 10000 | 168.558 | 27 | 0.001 |
| 3007_C2_77644_EMLK | 73022  | 10000 | 170.828 | 12 | 0     |
| 3007_C2_77648_EMLK | 54662  | 10000 | 191.01  | 27 | 0     |
| 3007_C2_77649_EMLK | 103542 | 10000 | 176.834 | 24 | 0     |

# SM\_Table 6 Page 1 Minor Variant Fractions

| reads_file                           | position | motif_A                | snpA | snpA_count | motif_B                | snpB | snpB_count | fraction_minor | total_count |
|--------------------------------------|----------|------------------------|------|------------|------------------------|------|------------|----------------|-------------|
| 0208_C1_77667_EMLK_125.spltChi.qc.fq | 8072     | TCGCTTTATTCTGTATATGCA  | C    | 1527       | TCGCTTTATTTTGTATATGCA  | T    | 1          | 0.00065        | 1528        |
| 0208_C1_77667_EMLK_125.spltChi.qc.fq | 10511    | TGGAAGTTTATTGGGCTGGT   | A    | 1453       | TGGAAGTTTATTGGGCTGGT   | G    | 0          | 0.00000        | 1453        |
| 0208_C1_77667_EMLK_125.spltChi.qc.fq | 18542    | CGCACTCTTTATAATTAAGCT  | A    | 1366       | CGCACTCTTTGTAATTAAGCT  | G    | 1          | 0.00073        | 1367        |
| 0208_C1_77667_EMLK_125.spltChi.qc.fq | 18139    | GGTTCTATCATATTAGAGATT  | T    | 1331       | GGTTCTATCACCATTAGAGATT | C    | 1          | 0.00075        | 1332        |
| 0208_C1_77667_EMLK_125.spltChi.qc.fq | 13404    | AAGCATTTCTAGCAATATGA   | T    | 815        | AAGCATTTCCCAGCAATATGA  | C    | 1          | 0.00123        | 816         |
| 0208_C1_77667_EMLK_125.spltChi.qc.fq | 12671    | GGCTCACAAAGATCCGTGAATT | A    | 801        | GGCTCACAAAGGTCGTGAATT  | G    | 0          | 0.00000        | 801         |
| 0208_C1_77667_EMLK_125.spltChi.qc.fq | 2374     | TTCAAGAGGCCAGGAACCAAG  | C    | 739        | TTCAAGAGGTCAGGAACCAAG  | T    | 2          | 0.00271        | 741         |
| 0208_C1_77667_EMLK_125.spltChi.qc.fq | 4393     | AACCCAAACCAAAATGATGA   | A    | 695        | AACCCAAACCTAAAATGATGA  | T    | 0          | 0.00000        | 695         |
| 0208_C1_77667_EMLK_125.spltChi.qc.fq | 5046     | CACCTCAACCACTGCCTGCTGC | C    | 644        | CACCTCAACCAATGCCTGCTGC | A    | 1          | 0.00155        | 645         |
| 0208_C1_77667_EMLK_125.spltChi.qc.fq | 2776     | AAGAATTTTTGATGTCTAAGG  | G    | 572        | AAGAATTTTTTATGTCTAAGG  | T    | 0          | 0.00000        | 572         |
| 0208_C1_77667_EMLK_125.spltChi.qc.fq | 3650     | AACCACCACTGGACCATCAC   | T    | 490        | AACCACCACTCCGGACCATCAC | C    | 1          | 0.00204        | 491         |
| 0208_C1_77667_EMLK_125.spltChi.qc.fq | 5556     | AATCCGTCTACTAGAAGAGAT  | A    | 431        | AATCCGTCTACTAGAAGGGAT  | G    | 0          | 0.00000        | 431         |
| 0208_C1_77667_EMLK_125.spltChi.qc.fq | 18381    | TTGATCTGATTCAATAAATA   | T    | 286        | TTGATCTGATCTCAATAAATA  | C    | 0          | 0.00000        | 286         |
| 0208_C1_77667_EMLK_125.spltChi.qc.fq | 15285    | TTCCGCAGCCTTAAGAGAGGC  | T    | 242        | TTCCGCAGCCCTAAGAGAGGC  | C    | 0          | 0.00000        | 242         |
| 0208_C1_77667_EMLK_125.spltChi.qc.fq | 5578     | TTGATCAATATACTAAAGGTG  | T    | 239        | TTGATCAATACACTAAAGGTG  | C    | 0          | 0.00000        | 239         |
| 0208_C1_77667_EMLK_125.spltChi.qc.fq | 5524     | CTCAGGGATAGTGATAACATC  | T    | 227        | CTCAGGGATAGTGACAACATC  | C    | 0          | 0.00000        | 227         |
| 0208_C1_77667_EMLK_125.spltChi.qc.fq | 13611    | ATGGTGTTAAGAATGTTTTTA  | G    | 200        | ATGGTGTTAAAAATGTTTTTA  | A    | 0          | 0.00000        | 200         |
| 0208_C1_77669_EMLK_125.spltChi.qc.fq | 18139    | GGTTCTATCATATTAGAGATT  | T    | 653        | GGTTCTATCACATTAGAGATT  | C    | 1          | 0.00153        | 654         |
| 0208_C1_77669_EMLK_125.spltChi.qc.fq | 13404    | AAGCATTTCTAGCAATATGA   | T    | 585        | AAGCATTTCCCAGCAATATGA  | C    | 0          | 0.00000        | 585         |
| 0208_C1_77669_EMLK_125.spltChi.qc.fq | 18542    | CGCACTCTTTATAATTAAGCT  | A    | 578        | CGCACTCTTTGTAATTAAGCT  | G    | 0          | 0.00000        | 578         |
| 0208_C1_77669_EMLK_125.spltChi.qc.fq | 8072     | TCGCTTTATTCTGTATATGCA  | C    | 520        | TCGCTTTATTTTGTATATGCA  | T    | 0          | 0.00000        | 520         |
| 0208_C1_77669_EMLK_125.spltChi.qc.fq | 10511    | TGGAAGTTTATTGGGCTGGT   | A    | 504        | TGGAAGTTTGTGGGCTGGT    | G    | 1          | 0.00198        | 505         |
| 0208_C1_77669_EMLK_125.spltChi.qc.fq | 4393     | AACCCAAACCAAAATGATGA   | A    | 488        | AACCCAAACCTAAAATGATGA  | T    | 0          | 0.00000        | 488         |
| 0208_C1_77669_EMLK_125.spltChi.qc.fq | 5046     | CACCTCAACCACTGCCTGCTGC | C    | 376        | CACCTCAACCAATGCCTGCTGC | A    | 0          | 0.00000        | 376         |
| 0208_C1_77669_EMLK_125.spltChi.qc.fq | 12671    | GGCTCACAAAGATCCGTGAATT | A    | 362        | GGCTCACAAAGGTCGTGAATT  | G    | 1          | 0.00276        | 363         |
| 0208_C1_77669_EMLK_125.spltChi.qc.fq | 2374     | TTCAAGAGGCCAGGAACCAAG  | C    | 283        | TTCAAGAGGTCAGGAACCAAG  | T    | 0          | 0.00000        | 283         |
| 0208_C1_77669_EMLK_125.spltChi.qc.fq | 3650     | AACCACCACTGGACCATCAC   | T    | 262        | AACCACCACTCCGGACCATCAC | C    | 0          | 0.00000        | 262         |
| 0208_C1_77669_EMLK_125.spltChi.qc.fq | 5556     | AATCCGTCTACTAGAAGAGAT  | A    | 257        | AATCCGTCTACTAGAAGGGAT  | G    | 0          | 0.00000        | 257         |
| 0208_C1_77669_EMLK_125.spltChi.qc.fq | 2776     | AAGAATTTTTGATGTCTAAGG  | G    | 256        | AAGAATTTTTTATGTCTAAGG  | T    | 0          | 0.00000        | 256         |
| 0208_C1_77669_EMLK_125.spltChi.qc.fq | 15285    | TTCCGCAGCCTTAAGAGAGGC  | T    | 233        | TTCCGCAGCCCTAAGAGAGGC  | C    | 0          | 0.00000        | 233         |
| 0208_C1_77669_EMLK_125.spltChi.qc.fq | 5578     | TTGATCAATATACTAAAGGTG  | T    | 199        | TTGATCAATACACTAAAGGTG  | C    | 0          | 0.00000        | 199         |
| 0208_C1_77669_EMLK_125.spltChi.qc.fq | 18381    | TTGATCTGATTCAATAAATA   | T    | 186        | TTGATCTGATCTCAATAAATA  | C    | 0          | 0.00000        | 186         |
| 0208_C1_77669_EMLK_125.spltChi.qc.fq | 13611    | ATGGTGTTAAGAATGTTTTTA  | G    | 142        | ATGGTGTTAAAAATGTTTTTA  | A    | 3          | 0.02113        | 145         |
| 0208_C1_77670_EMLK_125.spltChi.qc.fq | 18542    | CGCACTCTTTATAATTAAGCT  | A    | 1284       | CGCACTCTTTGTAATTAAGCT  | G    | 1          | 0.00078        | 1285        |
| 0208_C1_77670_EMLK_125.spltChi.qc.fq | 18139    | GGTTCTATCATATTAGAGATT  | T    | 1240       | GGTTCTATCACATTAGAGATT  | C    | 1          | 0.00081        | 1241        |
| 0208_C1_77670_EMLK_125.spltChi.qc.fq | 13404    | AAGCATTTCTAGCAATATGA   | T    | 1235       | AAGCATTTCCCAGCAATATGA  | C    | 1          | 0.00081        | 1236        |
| 0208_C1_77670_EMLK_125.spltChi.qc.fq | 8072     | TCGCTTTATTCTGTATATGCA  | C    | 1180       | TCGCTTTATTTTGTATATGCA  | T    | 0          | 0.00000        | 1180        |
| 0208_C1_77670_EMLK_125.spltChi.qc.fq | 10511    | TGGAAGTTTATTGGGCTGGT   | A    | 1052       | TGGAAGTTTGTGGGCTGGT    | G    | 1          | 0.00095        | 1053        |
| 0208_C1_77670_EMLK_125.spltChi.qc.fq | 5046     | CACCTCAACCACTGCCTGCTGC | C    | 839        | CACCTCAACCAATGCCTGCTGC | A    | 0          | 0.00000        | 839         |
| 0208_C1_77670_EMLK_125.spltChi.qc.fq | 4393     | AACCCAAACCAAAATGATGA   | A    | 743        | AACCCAAACCTAAAATGATGA  | T    | 0          | 0.00000        | 743         |
| 0208_C1_77670_EMLK_125.spltChi.qc.fq | 12671    | GGCTCACAAAGATCCGTGAATT | A    | 685        | GGCTCACAAAGGTCGTGAATT  | G    | 1          | 0.00146        | 686         |
| 0208_C1_77670_EMLK_125.spltChi.qc.fq | 5556     | AATCCGTCTACTAGAAGAGAT  | A    | 647        | AATCCGTCTACTAGAAGGGAT  | G    | 1          | 0.00155        | 648         |
| 0208_C1_77670_EMLK_125.spltChi.qc.fq | 2776     | AAGAATTTTTGATGTCTAAGG  | G    | 623        | AAGAATTTTTTATGTCTAAGG  | T    | 0          | 0.00000        | 623         |
| 0208_C1_77670_EMLK_125.spltChi.qc.fq | 2374     | TTCAAGAGGCCAGGAACCAAG  | C    | 539        | TTCAAGAGGTCAGGAACCAAG  | T    | 0          | 0.00000        | 539         |
| 0208_C1_77670_EMLK_125.spltChi.qc.fq | 3650     | AACCACCACTGGACCATCAC   | T    | 511        | AACCACCACTCCGGACCATCAC | C    | 0          | 0.00000        | 511         |
| 0208_C1_77670_EMLK_125.spltChi.qc.fq | 5578     | TTGATCAATATACTAAAGGTG  | T    | 498        | TTGATCAATACACTAAAGGTG  | C    | 0          | 0.00000        | 498         |
| 0208_C1_77670_EMLK_125.spltChi.qc.fq | 15285    | TTCCGCAGCCTTAAGAGAGGC  | T    | 392        | TTCCGCAGCCCTAAGAGAGGC  | C    | 1          | 0.00255        | 393         |
| 0208_C1_77670_EMLK_125.spltChi.qc.fq | 18381    | TTGATCTGATTCAATAAATA   | T    | 322        | TTGATCTGATCTCAATAAATA  | C    | 0          | 0.00000        | 322         |
| 0208_C1_77670_EMLK_125.spltChi.qc.fq | 13611    | ATGGTGTTAAGAATGTTTTTA  | G    | 281        | ATGGTGTTAAAAATGTTTTTA  | A    | 0          | 0.00000        | 281         |
| 0208_C1_77670_EMLK_125.spltChi.qc.fq | 5524     | CTCAGGGATAGTGATAACATC  | T    | 204        | CTCAGGGATAGTGACAACATC  | C    | 0          | 0.00000        | 204         |
| 0208_C1_77673_EMLK_125.spltChi.qc.fq | 18542    | CGCACTCTTTATAATTAAGCT  | A    | 990        | CGCACTCTTTGTAATTAAGCT  | G    | 3          | 0.00303        | 993         |
| 0208_C1_77673_EMLK_125.spltChi.qc.fq | 8072     | TCGCTTTATTCTGTATATGCA  | C    | 908        | TCGCTTTATTTTGTATATGCA  | T    | 0          | 0.00000        | 908         |
| 0208_C1_77673_EMLK_125.spltChi.qc.fq | 13404    | AAGCATTTCTAGCAATATGA   | T    | 901        | AAGCATTTCCCAGCAATATGA  | C    | 2          | 0.00222        | 903         |
| 0208_C1_77673_EMLK_125.spltChi.qc.fq | 18139    | GGTTCTATCATATTAGAGATT  | T    | 866        | GGTTCTATCACATTAGAGATT  | C    | 0          | 0.00000        | 866         |
| 0208_C1_77673_EMLK_125.spltChi.qc.fq | 10511    | TGGAAGTTTATTGGGCTGGT   | A    | 788        | TGGAAGTTTGTGGGCTGGT    | G    | 2          | 0.00254        | 790         |
| 0208_C1_77673_EMLK_125.spltChi.qc.fq | 5046     | CACCTCAACCACTGCCTGCTGC | C    | 659        | CACCTCAACCAATGCCTGCTGC | A    | 0          | 0.00000        | 659         |
| 0208_C1_77673_EMLK_125.spltChi.qc.fq | 4393     | AACCCAAACCAAAATGATGA   | A    | 608        | AACCCAAACCTAAAATGATGA  | T    | 0          | 0.00000        | 608         |
| 0208_C1_77673_EMLK_125.spltChi.qc.fq | 12671    | GGCTCACAAAGATCCGTGAATT | A    | 599        | GGCTCACAAAGGTCGTGAATT  | G    | 0          | 0.00000        | 599         |
| 0208_C1_77673_EMLK_125.spltChi.qc.fq | 5556     | AATCCGTCTACTAGAAGAGAT  | A    | 471        | AATCCGTCTACTAGAAGGGAT  | G    | 1          | 0.00212        | 472         |
| 0208_C1_77673_EMLK_125.spltChi.qc.fq | 3650     | AACCACCACTGGACCATCAC   | T    | 382        | AACCACCACTCCGGACCATCAC | C    | 1          | 0.00262        | 383         |
| 0208_C1_77673_EMLK_125.spltChi.qc.fq | 5578     | TTGATCAATATACTAAAGGTG  | T    | 374        | TTGATCAATACACTAAAGGTG  | C    | 1          | 0.00267        | 375         |
| 0208_C1_77673_EMLK_125.spltChi.qc.fq | 2374     | TTCAAGAGGCCAGGAACCAAG  | C    | 367        | TTCAAGAGGTCAGGAACCAAG  | T    | 1          | 0.00272        | 368         |
| 0208_C1_77673_EMLK_125.spltChi.qc.fq | 15285    | TTCCGCAGCCTTAAGAGAGGC  | T    | 356        | TTCCGCAGCCCTAAGAGAGGC  | C    | 2          | 0.00562        | 358         |
| 0208_C1_77673_EMLK_125.spltChi.qc.fq | 2776     | AAGAATTTTTGATGTCTAAGG  | G    | 313        | AAGAATTTTTTATGTCTAAGG  | T    | 0          | 0.00000        | 313         |
| 0208_C1_77673_EMLK_125.spltChi.qc.fq | 13611    | ATGGTGTTAAGAATGTTTTTA  | G    | 209        | ATGGTGTTAAAAATGTTTTTA  | A    | 1          | 0.00478        | 210         |
| 0208_C1_77673_EMLK_125.spltChi.qc.fq | 18381    | TTGATCTGATTCAATAAATA   | T    | 173        | TTGATCTGATCTCAATAAATA  | C    | 0          | 0.00000        | 173         |
| 0208_C1_77673_EMLK_125.spltChi.qc.fq | 5524     | CTCAGGGATAGTGATAACATC  | T    | 138        | CTCAGGGATAGTGACAACATC  | C    | 0          | 0.00000        | 138         |
| 0208_C1_77675_EMLK_125.spltChi.qc.fq | 18139    | GGTTCTATCATATTAGAGATT  | T    | 807        | GGTTCTATCACATTAGAGATT  | C    | 1          | 0.00124        | 808         |
| 0208_C1_77675_EMLK_125.spltChi.qc.fq | 10511    | TGGAAGTTTATTGGGCTGGT   | A    | 776        | TGGAAGTTTGTGGGCTGGT    | G    | 1          | 0.00129        | 777         |
| 0208_C1_77675_EMLK_125.spltChi.qc.fq | 13404    | AAGCATTTCTAGCAATATGA   | T    | 746        | AAGCATTTCCCAGCAATATGA  | C    | 2          | 0.00268        | 748         |
| 0208_C1_77675_EMLK_125.spltChi.qc.fq | 18542    | CGCACTCTTTATAATTAAGCT  | A    | 676        | CGCACTCTTTGTAATTAAGCT  | G    | 1          | 0.00148        | 677         |
| 0208_C1_77675_EMLK_125.spltChi.qc.fq | 8072     | TCGCTTTATTCTGTATATGCA  | C    | 610        | TCGCTTTATTTTGTATATGCA  | T    | 1          | 0.00164        | 611         |
| 0208_C1_77675_EMLK_125.spltChi.qc.fq | 12671    | GGCTCACAAAGATCCGTGAATT | A    | 512        | GGCTCACAAAGGTCGTGAATT  | G    | 0          | 0.00000        | 512         |
| 0208_C1_77675_EMLK_125.spltChi.qc.fq | 5046     | CACCTCAACCACTGCCTGCTGC | C    | 458        | CACCTCAACCAATGCCTGCTGC | A    | 0          | 0.00000        | 458         |
| 0208_C1_77675_EMLK_125.spltChi.qc.fq | 2374     | TTCAAGAGGCCAGGAACCAAG  | C    | 371        | TTCAAGAGGTCAGGAACCAAG  | T    | 1          | 0.00270        | 372         |
| 0208_C1_77675_EMLK_125.spltChi.qc.fq | 2776     | AAGAATTTTTGATGTCTAAGG  | G    | 364        | AAGAATTTTTTATGTCTAAGG  | T    | 0          | 0.00000        | 364         |
| 0208_C1_77675_EMLK_125.spltChi.qc.fq | 5556     | AATCCGTCTACTAGAAGAGAT  | A    | 312        | AATCCGTCTACTAGAAGGGAT  | G    | 1          | 0.00321        | 313         |
| 0208_C1_77675_EMLK_125.spltChi.qc.fq | 3650     | AACCACCACTGGACCATCAC   | T    | 300        | AACCACCACTCCGGACCATCAC | C    | 1          | 0.00333        | 301         |
| 0208_C1_77675_EMLK_125.spltChi.qc.fq | 15285    | TTCCGCAGCCTTAAGAGAGGC  | T    | 277        | TTCCGCAGCCCTAAGAGAGGC  | C    | 0          | 0.00000        | 277         |
| 0208_C1_77675_EMLK_125.spltChi.qc.fq | 18381    | TTGATCTGATTCAATAAATA   | T    | 217        | TTGATCTGATCTCAATAAATA  | C    | 0          | 0.00000        | 217         |
| 0208_C1_77675_EMLK_125.spltChi.qc.fq | 5578     | TTGATCAATATACTAAAGGTG  | T    | 209        | TTGATCAATACACTAAAGGTG  | C    | 0          | 0.00000        | 209         |
| 0208_C1_77675_EMLK_125.spltChi.qc.fq | 4393     | AACCCAAACCAAAATGATGA   | A    | 203        | AACCCAAACCTAAAATGATGA  | T    | 0          | 0.00000        | 203         |
| 0208_C1_77675_EMLK_125.spltChi.qc.fq | 13611    | ATGGTGTTAAGAATGTTTTTA  | G    | 171        | ATGGTGTTAAAAATGTTTTTA  | A    | 0          | 0.00000        | 171         |
| 0208_C1_77675_EMLK_125.spltChi.qc.fq | 5524     | CTCAGGGATAGTGATAACATC  | T    | 132        | CTCAGGGATAGTGACAACATC  | C    | 0          | 0.00000        | 132         |
| 0208_C1_77676_EMLK_125.spltChi.qc.fq | 8072     | TCGCTTTATTCTGTATATGCA  | C    | 4966       | TCGCTTTATTTTGTATATGCA  | T    | 2          | 0.00040        | 4968        |
| 0208_C1_77676_EMLK_125.spltChi.qc.fq | 18542    | CGCACTCTTTATAATTAAGCT  | A    | 3987       | CGCACTCTTTGTAATTAAGCT  | G    | 1          | 0.00025        | 3988        |
| 0208_C1_77676_EMLK_125.spltChi.qc.fq | 10511    | TGGAAGTTTATTGGGCTGGT   | A    | 3576       | TGGAAGTTTGTGGGCTGGT    | G    | 1          | 0.00028        | 3577        |
| 0208_C1_77676_EMLK_125.spltChi.qc.fq | 18139    | GGTTCTATCATATTAGAGATT  | T    | 2823       | GGTTCTATCACATTAGAGATT  | C    | 1          | 0.00035        | 2824        |
| 0208_C1_77676_EMLK_125.spltChi.qc.fq | 5046     | CACCTCAACCACTGCCTGCTGC | C    | 2574       | CACCTCAACCAATGCCTGCTGC | A    | 0          | 0.00000        | 2574        |
| 0208_C1_77676_EMLK_125.spltChi.qc.fq | 2374     | TTCAAGAGGCCAGGAACCAAG  | C    | 2233       | TTCAAGAGGTCAGGAACCAAG  | T    | 5          | 0.00224        | 2238        |
| 0208_C1_77676_EMLK_125.spltChi.qc.fq | 13404    | AAGCATTTCTAGCAATATGA   | T    | 2237       | AAGCATTTCCCAGCAATATGA  | C    | 1          | 0.00045        | 2238        |

# SM\_Table 6 Page 2 Minor Variant Fractions

|                                      |                              |   |                              |   |      |         |      |
|--------------------------------------|------------------------------|---|------------------------------|---|------|---------|------|
| 0208_C1_77676_EMLK_125.spltChi.qc.fq | 5556 AATCCGCTCTACTAGAAAGAT   | A | 2041 AATCCGTCTCTACTAGAAGGGAT | G | 1    | 0.00049 | 2042 |
| 0208_C1_77676_EMLK_125.spltChi.qc.fq | 3650 AACCACCACCTGGACCATCAC   | T | 1959 AACCACCACCCGGACCATCAC   | C | 4    | 0.00204 | 1963 |
| 0208_C1_77676_EMLK_125.spltChi.qc.fq | 12671 GGCTCACAAGATCCGTGAATT  | A | 1910 GGCTCACAAGGTCGTGAATT    | G | 2    | 0.00105 | 1912 |
| 0208_C1_77676_EMLK_125.spltChi.qc.fq | 4393 AACCCAAACCAAAATGATGA    | A | 1547 AACCCAAACCTAAAATGATGA   | T | 2    | 0.00129 | 1549 |
| 0208_C1_77676_EMLK_125.spltChi.qc.fq | 15285 TTCCGCAGCCTTAAGAGAGGC  | T | 1478 TTCCGCAGCCCTAAGAGAGGC   | C | 2    | 0.00135 | 1480 |
| 0208_C1_77676_EMLK_125.spltChi.qc.fq | 5578 TTGATCAATATACTAAAGGTG   | T | 1313 TTGATCAATACACTAAAGGTG   | C | 1    | 0.00076 | 1314 |
| 0208_C1_77676_EMLK_125.spltChi.qc.fq | 13611 ATGGTGTTAAGAAATGTTTTTA | G | 1284 ATGGTGTTAAAAATGTTTTTA   | A | 1    | 0.00078 | 1285 |
| 0208_C1_77676_EMLK_125.spltChi.qc.fq | 5524 CTCAGGGATAGTGATAACATC   | T | 1011 CTCAGGGATAGTGACAAACATC  | C | 0    | 0.00000 | 1011 |
| 0208_C1_77676_EMLK_125.spltChi.qc.fq | 18381 TTGATCTGATTTCAATAAATA  | T | 654 TTGATCTGATCTCAATAAATA    | C | 1    | 0.00153 | 655  |
| 0208_C1_77676_EMLK_125.spltChi.qc.fq | 2776 AAGAATTTTTTGATGCTAAGG   | G | 515 AAGAATTTTTTATGTCTAAGG    | T | 0    | 0.00000 | 515  |
| 0208_C1_77676_EMLK_125.spltChi.qc.fq | 10476 TCTGTAACCTTCTAGTTAGTC  | C | 155 TCTGTAACCTTTTAGTTAGTC    | T | 0    | 0.00000 | 155  |
| 0208_C1_77677_EMLK_125.spltChi.qc.fq | 18542 CGCACTCTTTATAATTAAGCT  | A | 2241 CGCACTCTTTGTAATTAAGCT   | G | 1    | 0.00045 | 2242 |
| 0208_C1_77677_EMLK_125.spltChi.qc.fq | 8072 TCGCTTTATTCTGTATATGCA   | C | 1632 TCGCTTTATTGTATATATGCA   | T | 0    | 0.00000 | 1632 |
| 0208_C1_77677_EMLK_125.spltChi.qc.fq | 10511 TGGAAAGTTTATTGGGCTGGT  | A | 1544 TGGAAAGTTTGTGGGCTGGT    | G | 1    | 0.00065 | 1545 |
| 0208_C1_77677_EMLK_125.spltChi.qc.fq | 13404 AAGCATTTCTAGCAATATGA   | T | 1002 AAGCATTTCCCAGCAATATGA   | C | 0    | 0.00000 | 1002 |
| 0208_C1_77677_EMLK_125.spltChi.qc.fq | 18139 GGTTCTATCATATTAGAGATT  | T | 933 GGTTCTATCATATTAGAGATT    | C | 1    | 0.00107 | 934  |
| 0208_C1_77677_EMLK_125.spltChi.qc.fq | 5046 CACTCAACCACTGCCTGCTGC   | C | 900 CACTCAACCAATGCCTGCTGC    | A | 0    | 0.00000 | 900  |
| 0208_C1_77677_EMLK_125.spltChi.qc.fq | 12671 GGCTCACAAGATCCGTGAATT  | A | 779 GGCTCACAAGGTCGTGAATT     | G | 1    | 0.00128 | 780  |
| 0208_C1_77677_EMLK_125.spltChi.qc.fq | 2374 TTCAAGAGGCCAGGAACCAAG   | C | 705 TTCAAGAGGTCAGGAACCAAG    | T | 2    | 0.00284 | 707  |
| 0208_C1_77677_EMLK_125.spltChi.qc.fq | 3650 AACCACCACCTGGACCATCAC   | T | 646 AACCACCACCCGGACCATCAC    | C | 0    | 0.00000 | 646  |
| 0208_C1_77677_EMLK_125.spltChi.qc.fq | 5556 AATCCGTCTACTAGAAGAGAT   | A | 602 AATCCGTCTACTAGAAGGGAT    | G | 1    | 0.00166 | 603  |
| 0208_C1_77677_EMLK_125.spltChi.qc.fq | 4393 AACCCAAACCAAAATGATGA    | A | 533 AACCCAAACCTAAAATGATGA    | T | 1    | 0.00188 | 534  |
| 0208_C1_77677_EMLK_125.spltChi.qc.fq | 15285 TTCCGCAGCCTTAAGAGAGGC  | T | 483 TTCCGCAGCCCTAAGAGAGGC    | C | 0    | 0.00000 | 483  |
| 0208_C1_77677_EMLK_125.spltChi.qc.fq | 5578 TTGATCAATATACTAAAGGTG   | T | 439 TTGATCAATACACTAAAGGTG    | C | 1    | 0.00228 | 440  |
| 0208_C1_77677_EMLK_125.spltChi.qc.fq | 13611 ATGGTGTTAAGAAATGTTTTTA | G | 359 ATGGTGTTAAAAATGTTTTTA    | A | 0    | 0.00000 | 359  |
| 0208_C1_77677_EMLK_125.spltChi.qc.fq | 5524 CTCAGGGATAGTGATAACATC   | T | 224 CTCAGGGATAGTGACAACATC    | C | 1    | 0.00446 | 225  |
| 0208_C1_77677_EMLK_125.spltChi.qc.fq | 2776 AAGAATTTTTTGATGCTAAGG   | G | 218 AAGAATTTTTTATGTCTAAGG    | T | 0    | 0.00000 | 218  |
| 0208_C1_77677_EMLK_125.spltChi.qc.fq | 18381 TTGATCTGATTTCAATAAATA  | T | 203 TTGATCTGATCTCAATAAATA    | C | 0    | 0.00000 | 203  |
| 0208_C1_77679_EMLK_125.spltChi.qc.fq | 18139 GGTTCTATCATATTAGAGATT  | T | 896 GGTTCTATCATATTAGAGATT    | C | 1    | 0.00112 | 897  |
| 0208_C1_77679_EMLK_125.spltChi.qc.fq | 8072 TCGCTTTATTCTGTATATGCA   | C | 861 TCGCTTTATTTGTATATATGCA   | T | 1    | 0.00116 | 862  |
| 0208_C1_77679_EMLK_125.spltChi.qc.fq | 18542 CGCACTCTTTATAATTAAGCT  | A | 788 CGCACTCTTTGTAATTAAGCT    | G | 3    | 0.00381 | 791  |
| 0208_C1_77679_EMLK_125.spltChi.qc.fq | 10511 TGGAAAGTTTATTGGGCTGGT  | A | 777 TGGAAAGTTTGTGGGCTGGT     | G | 0    | 0.00000 | 777  |
| 0208_C1_77679_EMLK_125.spltChi.qc.fq | 13404 AAGCATTTCTAGCAATATGA   | T | 748 AAGCATTTCCCAGCAATATGA    | C | 1    | 0.00134 | 749  |
| 0208_C1_77679_EMLK_125.spltChi.qc.fq | 4393 AACCCAAACCAAAATGATGA    | A | 590 AACCCAAACCTAAAATGATGA    | T | 0    | 0.00000 | 590  |
| 0208_C1_77679_EMLK_125.spltChi.qc.fq | 12671 GGCTCACAAGATCCGTGAATT  | A | 544 GGCTCACAAGGTCGTGAATT     | G | 0    | 0.00000 | 544  |
| 0208_C1_77679_EMLK_125.spltChi.qc.fq | 5046 CACTCAACCACTGCCTGCTGC   | C | 524 CACTCAACCAATGCCTGCTGC    | A | 0    | 0.00000 | 524  |
| 0208_C1_77679_EMLK_125.spltChi.qc.fq | 5556 AATCCGTCTACTAGAAGAGAT   | A | 406 AATCCGTCTACTAGAAGGGAT    | G | 0    | 0.00000 | 406  |
| 0208_C1_77679_EMLK_125.spltChi.qc.fq | 2374 TTCAAGAGGCCAGGAACCAAG   | C | 369 TTCAAGAGGTCAGGAACCAAG    | T | 0    | 0.00000 | 369  |
| 0208_C1_77679_EMLK_125.spltChi.qc.fq | 2776 AAGAATTTTTTGATGCTAAGG   | G | 361 AAGAATTTTTTATGTCTAAGG    | T | 0    | 0.00000 | 361  |
| 0208_C1_77679_EMLK_125.spltChi.qc.fq | 3650 AACCACCACCTGGACCATCAC   | C | 357 AACCACCACCCGGACCATCAC    | C | 0    | 0.00000 | 357  |
| 0208_C1_77679_EMLK_125.spltChi.qc.fq | 5578 TTGATCAATATACTAAAGGTG   | T | 295 TTGATCAATACACTAAAGGTG    | C | 0    | 0.00000 | 295  |
| 0208_C1_77679_EMLK_125.spltChi.qc.fq | 15285 TTCCGCAGCCTTAAGAGAGGC  | T | 285 TTCCGCAGCCCTAAGAGAGGC    | C | 0    | 0.00000 | 285  |
| 0208_C1_77679_EMLK_125.spltChi.qc.fq | 13611 ATGGTGTTAAGAAATGTTTTTA | G | 236 ATGGTGTTAAAAATGTTTTTA    | A | 0    | 0.00000 | 236  |
| 0208_C1_77679_EMLK_125.spltChi.qc.fq | 18381 TTGATCTGATTTCAATAAATA  | T | 232 TTGATCTGATCTCAATAAATA    | C | 0    | 0.00000 | 232  |
| 0208_C1_77679_EMLK_125.spltChi.qc.fq | 5524 CTCAGGGATAGTGATAACATC   | T | 164 CTCAGGGATAGTGACAACATC    | C | 0    | 0.00000 | 164  |
| 0208_C1_77681_EMLK_125.spltChi.qc.fq | 18542 CGCACTCTTTATAATTAAGCT  | A | 3194 CGCACTCTTTTGTAAATTAAGCT | G | 1    | 0.00031 | 3195 |
| 0208_C1_77681_EMLK_125.spltChi.qc.fq | 8072 TCGCTTTATTCTGTATATGCA   | C | 2647 TCGCTTTATTGTATATATGCA   | T | 1    | 0.00038 | 2648 |
| 0208_C1_77681_EMLK_125.spltChi.qc.fq | 10511 TGGAAAGTTTATTGGGCTGGT  | A | 1829 TGGAAAGTTTGTGGGCTGGT    | G | 0    | 0.00000 | 1829 |
| 0208_C1_77681_EMLK_125.spltChi.qc.fq | 18139 GGTTCTATCATATTAGAGATT  | T | 1358 GGTTCTATCATATTAGAGATT   | C | 1    | 0.00074 | 1359 |
| 0208_C1_77681_EMLK_125.spltChi.qc.fq | 5046 CACTCAACCACTGCCTGCTGC   | C | 1309 CACTCAACCAATGCCTGCTGC   | A | 0    | 0.00000 | 1309 |
| 0208_C1_77681_EMLK_125.spltChi.qc.fq | 13404 AAGCATTTCTAGCAATATGA   | T | 1296 AAGCATTTCCCAGCAATATGA   | C | 1    | 0.00077 | 1297 |
| 0208_C1_77681_EMLK_125.spltChi.qc.fq | 12671 GGCTCACAAGATCCGTGAATT  | A | 992 GGCTCACAAGGTCGTGAATT     | G | 2    | 0.00202 | 994  |
| 0208_C1_77681_EMLK_125.spltChi.qc.fq | 3650 AACCACCACCTGGACCATCAC   | T | 873 AACCACCACCCGGACCATCAC    | C | 2    | 0.00229 | 875  |
| 0208_C1_77681_EMLK_125.spltChi.qc.fq | 5556 AATCCGTCTACTAGAAGAGAT   | A | 863 AATCCGTCTACTAGAAGGGAT    | G | 0    | 0.00000 | 863  |
| 0208_C1_77681_EMLK_125.spltChi.qc.fq | 2374 TTCAAGAGGCCAGGAACCAAG   | C | 855 TTCAAGAGGTCAGGAACCAAG    | T | 2    | 0.00234 | 857  |
| 0208_C1_77681_EMLK_125.spltChi.qc.fq | 15285 TTCCGCAGCCTTAAGAGAGGC  | T | 764 TTCCGCAGCCCTAAGAGAGGC    | C | 0    | 0.00000 | 764  |
| 0208_C1_77681_EMLK_125.spltChi.qc.fq | 5578 TTGATCAATATACTAAAGGTG   | T | 672 TTGATCAATACACTAAAGGTG    | C | 0    | 0.00000 | 672  |
| 0208_C1_77681_EMLK_125.spltChi.qc.fq | 13611 ATGGTGTTAAGAAATGTTTTTA | G | 659 ATGGTGTTAAAAATGTTTTTA    | A | 1    | 0.00152 | 660  |
| 0208_C1_77681_EMLK_125.spltChi.qc.fq | 4393 AACCCAAACCAAAATGATGA    | A | 404 AACCCAAACCTAAAATGATGA    | T | 0    | 0.00000 | 404  |
| 0208_C1_77681_EMLK_125.spltChi.qc.fq | 5524 CTCAGGGATAGTGATAACATC   | T | 254 CTCAGGGATAGTGACAACATC    | C | 0    | 0.00000 | 254  |
| 0208_C1_MK10128R_125.spltChi.qc.fq   | 8072 TCGCTTTATTCTGTATATGCA   | C | 10 TCGCTTTATTTGTATATATGCA    | T | 8568 | 0.00117 | 8578 |
| 0208_C1_MK10128R_125.spltChi.qc.fq   | 18542 CGCACTCTTTATAATTAAGCT  | A | 6 CGCACTCTTTGTAATTAAGCT      | G | 6183 | 0.00097 | 6189 |
| 0208_C1_MK10128R_125.spltChi.qc.fq   | 18139 GGTTCTATCATATTAGAGATT  | T | 4 GGTTCTATCATATTAGAGATT      | C | 4433 | 0.00090 | 4437 |
| 0208_C1_MK10128R_125.spltChi.qc.fq   | 2374 TTCAAGAGGCCAGGAACCAAG   | C | 13 TTCAAGAGGTCAGGAACCAAG     | T | 3928 | 0.00331 | 3941 |
| 0208_C1_MK10128R_125.spltChi.qc.fq   | 10511 TGGAAAGTTTATTGGGCTGGT  | A | 2 TGGAAAGTTTGTGGGCTGGT       | G | 3478 | 0.00058 | 3480 |
| 0208_C1_MK10128R_125.spltChi.qc.fq   | 5046 CACTCAACCACTGCCTGCTGC   | C | 3 CACTCAACCAATGCCTGCTGC      | A | 2804 | 0.00107 | 2807 |
| 0208_C1_MK10128R_125.spltChi.qc.fq   | 12671 GGCTCACAAGATCCGTGAATT  | A | 3 GGCTCACAAGGTCGTGAATT       | G | 2442 | 0.00123 | 2445 |
| 0208_C1_MK10128R_125.spltChi.qc.fq   | 4393 AACCCAAACCAAAATGATGA    | A | 1 AACCCAAACCTAAAATGATGA      | T | 2251 | 0.00044 | 2252 |
| 0208_C1_MK10128R_125.spltChi.qc.fq   | 3650 AACCACCACCTGGACCATCAC   | T | 10 AACCACCACCCGGACCATCAC     | C | 2011 | 0.00497 | 2021 |
| 0208_C1_MK10128R_125.spltChi.qc.fq   | 13404 AAGCATTTCTAGCAATATGA   | T | 1 AAGCATTTCCCAGCAATATGA      | C | 1665 | 0.00060 | 1666 |
| 0208_C1_MK10128R_125.spltChi.qc.fq   | 15285 TTCCGCAGCCTTAAGAGAGGC  | T | 0 TTCCGCAGCCCTAAGAGAGGC      | C | 1510 | 0.00000 | 1510 |
| 0208_C1_MK10128R_125.spltChi.qc.fq   | 18381 TTGATCTGATTTCAATAAATA  | T | 1 TTGATCTGATCTCAATAAATA      | C | 1484 | 0.00067 | 1485 |
| 0208_C1_MK10128R_125.spltChi.qc.fq   | 13611 ATGGTGTTAAGAAATGTTTTTA | G | 1 ATGGTGTTAAAAATGTTTTTA      | A | 1408 | 0.00071 | 1409 |
| 0208_C1_MK10128R_125.spltChi.qc.fq   | 5556 AATCCGTCTACTAGAAGAGAT   | A | 2 AATCCGTCTACTAGAAGGGAT      | G | 811  | 0.00247 | 813  |
| 0208_C1_MK10128R_125.spltChi.qc.fq   | 2776 AAGAATTTTTTGATGCTAAGG   | G | 0 AAGAATTTTTTATGTCTAAGG      | T | 799  | 0.00000 | 799  |
| 0208_C1_MK10128R_125.spltChi.qc.fq   | 5578 TTGATCAATATACTAAAGGTG   | T | 0 TTGATCAATACACTAAAGGTG      | C | 762  | 0.00000 | 762  |
| 0208_C1_MK10128R_125.spltChi.qc.fq   | 10476 TCTGTAACCTTCTAGTTAGTC  | C | 0 TCTGTAACCTTTTAGTTAGTC      | T | 150  | 0.00000 | 150  |
| 0208_C1_MK10128R_125.spltChi.qc.fq   | 5524 CTCAGGGATAGTGATAACATC   | T | 0 CTCAGGGATAGTGACAAACATC     | C | 105  | 0.00000 | 105  |
| 0208_C1_MK10173_125.spltChi.qc.fq    | 8072 TCGCTTTATTCTGTATATGCA   | C | 6 TCGCTTTATTTGTATATATGCA     | T | 4847 | 0.00124 | 4853 |
| 0208_C1_MK10173_125.spltChi.qc.fq    | 18542 CGCACTCTTTATAATTAAGCT  | A | 6 CGCACTCTTTGTAATTAAGCT      | G | 3760 | 0.00160 | 3766 |
| 0208_C1_MK10173_125.spltChi.qc.fq    | 10511 TGGAAAGTTTATTGGGCTGGT  | A | 3 TGGAAAGTTTGTGGGCTGGT       | G | 2645 | 0.00113 | 2648 |
| 0208_C1_MK10173_125.spltChi.qc.fq    | 2374 TTCAAGAGGCCAGGAACCAAG   | C | 10 TTCAAGAGGTCAGGAACCAAG     | T | 2571 | 0.00389 | 2581 |
| 0208_C1_MK10173_125.spltChi.qc.fq    | 18139 GGTTCTATCATATTAGAGATT  | T | 3 GGTTCTATCATATTAGAGATT      | C | 2546 | 0.00118 | 2549 |
| 0208_C1_MK10173_125.spltChi.qc.fq    | 5046 CACTCAACCACTGCCTGCTGC   | C | 2 CACTCAACCAATGCCTGCTGC      | A | 1852 | 0.00108 | 1854 |
| 0208_C1_MK10173_125.spltChi.qc.fq    | 12671 GGCTCACAAGATCCGTGAATT  | A | 1 GGCTCACAAGGTCGTGAATT       | G | 1794 | 0.00056 | 1795 |
| 0208_C1_MK10173_125.spltChi.qc.fq    | 13404 AAGCATTTCTAGCAATATGA   | T | 3 AAGCATTTCCCAGCAATATGA      | C | 1604 | 0.00187 | 1607 |
| 0208_C1_MK10173_125.spltChi.qc.fq    | 3650 AACCACCACCTGGACCATCAC   | T | 4 AACCACCACCCGGACCATCAC      | C | 1485 | 0.00269 | 1489 |
| 0208_C1_MK10173_125.spltChi.qc.fq    | 4393 AACCCAAACCAAAATGATGA    | A | 0 AACCCAAACCTAAAATGATGA      | T | 1277 | 0.00000 | 1277 |
| 0208_C1_MK10173_125.spltChi.qc.fq    | 15285 TTCCGCAGCCTTAAGAGAGGC  | T | 0 TTCCGCAGCCCTAAGAGAGGC      | C | 1122 | 0.00000 | 1122 |
| 0208_C1_MK10173_125.spltChi.qc.fq    | 13611 ATGGTGTTAAGAAATGTTTTTA | G | 0 ATGGTGTTAAAAATGTTTTTA      | A | 858  | 0.00000 | 858  |
| 0208_C1_MK10173_125.spltChi.qc.fq    | 18381 TTGATCTGATTTCAATAAATA  | T | 0 TTGATCTGATCTCAATAAATA      | C | 744  | 0.00000 | 744  |
| 0208_C1_MK10173_125.spltChi.qc.fq    | 5556 AATCCGTCTACTAGAAGAGAT   | A | 0 AATCCGTCTACTAGAAGGGAT      | G | 534  | 0.00000 | 534  |

# SM\_Table 6 Page 3 Minor Variant Fractions

|                                      |       |                        |   |      |                        |   |      |         |      |
|--------------------------------------|-------|------------------------|---|------|------------------------|---|------|---------|------|
| 0208_C1_MK10173_125.spltChi.qc.fq    | 5578  | TTGATCAATATACTAAAGGTG  | T | 0    | TTGATCAATACACTAAAGGTG  | C | 513  | 0.00000 | 513  |
| 0208_C1_MK10173_125.spltChi.qc.fq    | 2776  | AAGAATTTTTGATGCTAAGG   | G | 0    | AAGAATTTTTTATGTCTAAGG  | T | 245  | 0.00000 | 245  |
| 0208_C1_MK10173_125.spltChi.qc.fq    | 10476 | TCTGTAACCTCTTAGTTAGTC  | C | 0    | TCTGTAACCTTTTAGTTAGTC  | T | 163  | 0.00000 | 163  |
| 2208_C1_MK0433R2_125.spltChi.qc.fq   | 6029  | AGCTTCACCTAGAAGGATATTG | G | 12   | AGCTTCACCTAAAAGGATATTG | A | 112  | 0.10714 | 124  |
| 2208_C1_MK0434R2_125.spltChi.qc.fq   | 6029  | AGCTTCACCTAGAAGGATATTG | G | 9    | AGCTTCACCTAAAAGGATATTG | A | 202  | 0.04455 | 211  |
| 2208_C1_MK0434R2_125.spltChi.qc.fq   | 10136 | ACATTGTATTAGGGGCAATAA  | A | 7    | ACATTGTATTGGGGGCAATAA  | G | 156  | 0.04487 | 163  |
| 2208_C1_MK0549R2_125.spltChi.qc.fq   | 6029  | AGCTTCACCTAGAAGGATATTG | G | 21   | AGCTTCACCTAAAAGGATATTG | A | 81   | 0.25926 | 102  |
| 2208_C1_MK2789R3_125.spltChi.qc.fq   | 10136 | ACATTGTATTAGGGGCAATAA  | A | 445  | ACATTGTATTGGGGGCAATAA  | G | 2    | 0.00449 | 447  |
| 2208_C1_MK2789R3_125.spltChi.qc.fq   | 6029  | AGCTTCACCTAGAAGGATATTG | G | 393  | AGCTTCACCTAAAAGGATATTG | A | 10   | 0.02545 | 403  |
| 2208_C1_MK2789R3_125.spltChi.qc.fq   | 18301 | ATAGTATTTTGATACTTGTA   | G | 147  | ATAGTATTTTATACCTTGTA   | T | 3    | 0.02041 | 150  |
| 2208_C1_MK2918R_125.spltChi.qc.fq    | 10136 | ACATTGTATTAGGGGCAATAA  | A | 2447 | ACATTGTATTGGGGGCAATAA  | G | 3    | 0.00123 | 2450 |
| 2208_C1_MK2918R_125.spltChi.qc.fq    | 6029  | AGCTTCACCTAGAAGGATATTG | G | 1973 | AGCTTCACCTAAAAGGATATTG | A | 1    | 0.00051 | 1974 |
| 2208_C1_MK2918R_125.spltChi.qc.fq    | 13663 | ATATGCATGTCAGTGATTATT  | C | 1020 | ATATGCATGTTAGTGATTATT  | T | 1    | 0.00098 | 1021 |
| 2208_C1_MK2918R_125.spltChi.qc.fq    | 18301 | ATAGTATTTTGATACTTGTA   | G | 895  | ATAGTATTTTATACCTTGTA   | T | 0    | 0.00000 | 895  |
| 2208_C1_MK3183R2_125.spltChi.qc.fq   | 6029  | AGCTTCACCTAGAAGGATATTG | G | 2531 | AGCTTCACCTAAAAGGATATTG | A | 4    | 0.00158 | 2535 |
| 2208_C1_MK3183R2_125.spltChi.qc.fq   | 10136 | ACATTGTATTAGGGGCAATAA  | A | 1438 | ACATTGTATTGGGGGCAATAA  | G | 4    | 0.00278 | 1442 |
| 2208_C1_MK3183R2_125.spltChi.qc.fq   | 13663 | ATATGCATGTCAGTGATTATT  | C | 764  | ATATGCATGTTAGTGATTATT  | T | 1    | 0.00131 | 765  |
| 2208_C1_MK3183R2_125.spltChi.qc.fq   | 18301 | ATAGTATTTTGATACTTGTA   | G | 756  | ATAGTATTTTATACCTTGTA   | T | 0    | 0.00000 | 756  |
| 2208_C1_PL4127R_125.spltChi.qc.fq    | 6029  | AGCTTCACCTAGAAGGATATTG | G | 1114 | AGCTTCACCTAAAAGGATATTG | A | 2    | 0.00180 | 1116 |
| 2208_C1_PL4127R_125.spltChi.qc.fq    | 10136 | ACATTGTATTAGGGGCAATAA  | A | 825  | ACATTGTATTGGGGGCAATAA  | G | 4    | 0.00485 | 829  |
| 2208_C1_PL4127R_125.spltChi.qc.fq    | 13663 | ATATGCATGTCAGTGATTATT  | C | 322  | ATATGCATGTTAGTGATTATT  | T | 1    | 0.00311 | 323  |
| 2208_C1_PL4127R_125.spltChi.qc.fq    | 18301 | ATAGTATTTTGATACTTGTA   | G | 284  | ATAGTATTTTATACCTTGTA   | T | 0    | 0.00000 | 284  |
| 2208_C1_PL4169R_125.spltChi.qc.fq    | 6029  | AGCTTCACCTAGAAGGATATTG | G | 827  | AGCTTCACCTAAAAGGATATTG | A | 3    | 0.00363 | 830  |
| 2208_C1_PL4169R_125.spltChi.qc.fq    | 10136 | ACATTGTATTAGGGGCAATAA  | A | 618  | ACATTGTATTGGGGGCAATAA  | G | 1    | 0.00162 | 619  |
| 2208_C1_PL4169R_125.spltChi.qc.fq    | 13663 | ATATGCATGTCAGTGATTATT  | C | 268  | ATATGCATGTTAGTGATTATT  | T | 0    | 0.00000 | 268  |
| 2208_C1_PL4169R_125.spltChi.qc.fq    | 18301 | ATAGTATTTTGATACTTGTA   | G | 247  | ATAGTATTTTATACCTTGTA   | T | 0    | 0.00000 | 247  |
| 2208_C1_PL4197R_125.spltChi.qc.fq    | 6029  | AGCTTCACCTAGAAGGATATTG | G | 821  | AGCTTCACCTAAAAGGATATTG | A | 1    | 0.00122 | 822  |
| 2208_C1_PL4197R_125.spltChi.qc.fq    | 10136 | ACATTGTATTAGGGGCAATAA  | A | 639  | ACATTGTATTGGGGGCAATAA  | G | 1    | 0.00156 | 640  |
| 2208_C1_PL4197R_125.spltChi.qc.fq    | 13663 | ATATGCATGTCAGTGATTATT  | C | 385  | ATATGCATGTTAGTGATTATT  | T | 0    | 0.00000 | 385  |
| 2208_C1_PL4197R_125.spltChi.qc.fq    | 18301 | ATAGTATTTTGATACTTGTA   | G | 367  | ATAGTATTTTATACCTTGTA   | T | 0    | 0.00000 | 367  |
| 2208_C1_PL4203R_125.spltChi.qc.fq    | 10136 | ACATTGTATTAGGGGCAATAA  | A | 575  | ACATTGTATTGGGGGCAATAA  | G | 1    | 0.00174 | 576  |
| 2208_C1_PL4203R_125.spltChi.qc.fq    | 6029  | AGCTTCACCTAGAAGGATATTG | G | 522  | AGCTTCACCTAAAAGGATATTG | A | 4    | 0.00766 | 526  |
| 2208_C1_PL4203R_125.spltChi.qc.fq    | 18301 | ATAGTATTTTGATACTTGTA   | G | 206  | ATAGTATTTTATACCTTGTA   | T | 0    | 0.00000 | 206  |
| 2208_C1_PL4203R_125.spltChi.qc.fq    | 13663 | ATATGCATGTCAGTGATTATT  | C | 201  | ATATGCATGTTAGTGATTATT  | T | 0    | 0.00000 | 201  |
| 2208_C1_PL4256R_125.spltChi.qc.fq    | 6029  | AGCTTCACCTAGAAGGATATTG | G | 4898 | AGCTTCACCTAAAAGGATATTG | A | 5    | 0.00102 | 4903 |
| 2208_C1_PL4256R_125.spltChi.qc.fq    | 10136 | ACATTGTATTAGGGGCAATAA  | A | 2598 | ACATTGTATTGGGGGCAATAA  | G | 2    | 0.00077 | 2600 |
| 2208_C1_PL4256R_125.spltChi.qc.fq    | 18301 | ATAGTATTTTGATACTTGTA   | G | 1137 | ATAGTATTTTATACCTTGTA   | T | 0    | 0.00000 | 1137 |
| 2208_C1_PL4256R_125.spltChi.qc.fq    | 13663 | ATATGCATGTCAGTGATTATT  | C | 638  | ATATGCATGTTAGTGATTATT  | T | 0    | 0.00000 | 638  |
| 2208_C1_PL4284R_125.spltChi.qc.fq    | 6029  | AGCTTCACCTAGAAGGATATTG | G | 522  | AGCTTCACCTAAAAGGATATTG | A | 10   | 0.00196 | 532  |
| 2208_C1_PL4284R_125.spltChi.qc.fq    | 10136 | ACATTGTATTAGGGGCAATAA  | A | 431  | ACATTGTATTGGGGGCAATAA  | G | 1    | 0.00232 | 432  |
| 2208_C1_PL4284R_125.spltChi.qc.fq    | 13663 | ATATGCATGTCAGTGATTATT  | C | 158  | ATATGCATGTTAGTGATTATT  | T | 0    | 0.00000 | 158  |
| 2208_C1_PL4284R_125.spltChi.qc.fq    | 18301 | ATAGTATTTTGATACTTGTA   | G | 142  | ATAGTATTTTATACCTTGTA   | T | 0    | 0.00000 | 142  |
| 2208_C1_PL4292R_125.spltChi.qc.fq    | 10136 | ACATTGTATTAGGGGCAATAA  | A | 1589 | ACATTGTATTGGGGGCAATAA  | G | 1    | 0.00063 | 1590 |
| 2208_C1_PL4292R_125.spltChi.qc.fq    | 6029  | AGCTTCACCTAGAAGGATATTG | G | 1285 | AGCTTCACCTAAAAGGATATTG | A | 0    | 0.00000 | 1285 |
| 2208_C1_PL4292R_125.spltChi.qc.fq    | 18301 | ATAGTATTTTGATACTTGTA   | G | 1165 | ATAGTATTTTATACCTTGTA   | T | 0    | 0.00000 | 1165 |
| 2208_C1_PL4292R_125.spltChi.qc.fq    | 13663 | ATATGCATGTCAGTGATTATT  | C | 1114 | ATATGCATGTTAGTGATTATT  | T | 0    | 0.00000 | 1114 |
| 2208_C1_PL4432R_125.spltChi.qc.fq    | 6029  | AGCTTCACCTAGAAGGATATTG | G | 461  | AGCTTCACCTAAAAGGATATTG | A | 2    | 0.00434 | 463  |
| 2208_C1_PL4432R_125.spltChi.qc.fq    | 18301 | ATAGTATTTTGATACTTGTA   | G | 167  | ATAGTATTTTATACCTTGTA   | T | 0    | 0.00000 | 167  |
| 2208_C1_PL4432R_125.spltChi.qc.fq    | 13663 | ATATGCATGTCAGTGATTATT  | C | 160  | ATATGCATGTTAGTGATTATT  | T | 0    | 0.00000 | 160  |
| 2208_C1_PL4736R_125.spltChi.qc.fq    | 6029  | AGCTTCACCTAGAAGGATATTG | G | 667  | AGCTTCACCTAAAAGGATATTG | A | 1    | 0.00150 | 668  |
| 2208_C1_PL4736R_125.spltChi.qc.fq    | 10136 | ACATTGTATTAGGGGCAATAA  | A | 479  | ACATTGTATTGGGGGCAATAA  | G | 0    | 0.00000 | 479  |
| 2208_C1_PL4736R_125.spltChi.qc.fq    | 13663 | ATATGCATGTCAGTGATTATT  | C | 198  | ATATGCATGTTAGTGATTATT  | T | 1    | 0.00505 | 199  |
| 2208_C1_PL4736R_125.spltChi.qc.fq    | 18301 | ATAGTATTTTGATACTTGTA   | G | 198  | ATAGTATTTTATACCTTGTA   | T | 0    | 0.00000 | 198  |
| 2906_C2_KT5034_125.spltChi.qc.fq     | 6029  | AGCTTCACCTAGAAGGATATTG | G | 494  | AGCTTCACCTAAAAGGATATTG | A | 9    | 0.01822 | 503  |
| 2906_C2_KT5034_125.spltChi.qc.fq     | 5865  | ATTTCTAAGTCGTTCAACAATC | C | 485  | ATTTCTAAGTTGTTCAACAATC | T | 6    | 0.01237 | 491  |
| 2906_C2_KT5034_125.spltChi.qc.fq     | 11455 | GTAACATAAATCGCAGGTCAT  | T | 174  | GTAACATAAATCGCAGGTCAT  | C | 14   | 0.08046 | 188  |
| 2906_C2_KT5786_125.spltChi.qc.fq     | 5865  | ATTTCTAAGTCGTTCAACAATC | C | 583  | ATTTCTAAGTTGTTCAACAATC | T | 5    | 0.00858 | 588  |
| 2906_C2_KT5786_125.spltChi.qc.fq     | 6029  | AGCTTCACCTAGAAGGATATTG | G | 533  | AGCTTCACCTAAAAGGATATTG | A | 3    | 0.00563 | 536  |
| 2906_C2_KT5786_125.spltChi.qc.fq     | 11455 | GTAACATAAATCGCAGGTCAT  | T | 194  | GTAACATAAATCGCAGGTCAT  | C | 11   | 0.05670 | 205  |
| 2906_C2_MK0364_125.spltChi.qc.fq     | 5865  | ATTTCTAAGTCGTTCAACAATC | C | 2    | ATTTCTAAGTTGTTCAACAATC | T | 377  | 0.00531 | 379  |
| 2906_C2_MK0364_125.spltChi.qc.fq     | 6029  | AGCTTCACCTAGAAGGATATTG | G | 1    | AGCTTCACCTAAAAGGATATTG | A | 357  | 0.00280 | 358  |
| 2906_C2_MK0364_125.spltChi.qc.fq     | 11455 | GTAACATAAATCGCAGGTCAT  | T | 0    | GTAACATAAATCGCAGGTCAT  | C | 160  | 0.00000 | 160  |
| 2906_C2_MK0365_125.spltChi.qc.fq     | 6029  | AGCTTCACCTAGAAGGATATTG | G | 0    | AGCTTCACCTAAAAGGATATTG | A | 656  | 0.00000 | 656  |
| 2906_C2_MK0365_125.spltChi.qc.fq     | 5865  | ATTTCTAAGTCGTTCAACAATC | C | 1    | ATTTCTAAGTTGTTCAACAATC | T | 618  | 0.00162 | 619  |
| 2906_C2_MK0365_125.spltChi.qc.fq     | 11455 | GTAACATAAATCGCAGGTCAT  | T | 0    | GTAACATAAATCGCAGGTCAT  | C | 129  | 0.00000 | 129  |
| 2906_C2_MK0366_125.spltChi.qc.fq     | 5865  | ATTTCTAAGTCGTTCAACAATC | C | 1    | ATTTCTAAGTTGTTCAACAATC | T | 563  | 0.00178 | 564  |
| 2906_C2_MK0366_125.spltChi.qc.fq     | 6029  | AGCTTCACCTAGAAGGATATTG | G | 1    | AGCTTCACCTAAAAGGATATTG | A | 499  | 0.00200 | 500  |
| 2906_C2_MK0366_125.spltChi.qc.fq     | 11455 | GTAACATAAATCGCAGGTCAT  | T | 0    | GTAACATAAATCGCAGGTCAT  | C | 294  | 0.00000 | 294  |
| 2906_C2_MK0366_125.spltChi.qc.fq     | 18301 | ATAGTATTTTGATACTTGTA   | G | 0    | ATAGTATTTTATACCTTGTA   | T | 190  | 0.00000 | 190  |
| 2906_C2_MK0368_125.spltChi.qc.fq     | 5865  | ATTTCTAAGTCGTTCAACAATC | C | 0    | ATTTCTAAGTTGTTCAACAATC | T | 982  | 0.00000 | 982  |
| 2906_C2_MK0368_125.spltChi.qc.fq     | 6029  | AGCTTCACCTAGAAGGATATTG | G | 2    | AGCTTCACCTAAAAGGATATTG | A | 299  | 0.00669 | 301  |
| 2906_C2_MK0368_125.spltChi.qc.fq     | 11455 | GTAACATAAATCGCAGGTCAT  | T | 0    | GTAACATAAATCGCAGGTCAT  | C | 187  | 0.00000 | 187  |
| 3007_C1_12578_EMLH_125.spltChi.qc.fq | 12395 | TAATCTCAAAATTAGCAGAGG  | T | 0    | TAATCTCAAAAATTAGCAGAGG | A | 3203 | 0.00000 | 3203 |
| 3007_C1_12578_EMLH_125.spltChi.qc.fq | 12758 | AACACTGGGGCATCTCTGTGC  | A | 1    | AACACTGGGGGCATCTCTGTGC | G | 1965 | 0.00051 | 1966 |
| 3007_C1_12578_EMLH_125.spltChi.qc.fq | 9719  | ATCCATCTCACCAAAAAATAA  | A | 2    | ATCCATCTCATCAAAAAATAA  | T | 937  | 0.00213 | 939  |
| 3007_C1_12578_EMLH_125.spltChi.qc.fq | 2484  | TTATCATATGGTGAAGGATGA  | G | 2    | TTATCATATGATGAAGGATGA  | A | 786  | 0.00254 | 788  |
| 3007_C1_12578_EMLH_125.spltChi.qc.fq | 6140  | CTTTTCCAAAAACATTTTCC   | A | 0    | CTTTTCCAAAAGAACATTTTCC | G | 665  | 0.00000 | 665  |
| 3007_C1_12578_EMLH_125.spltChi.qc.fq | 10199 | TCTGGGCTAACCCACCAAGGT  | C | 1    | CTGGGCTAACTCCACCAAGGT  | T | 550  | 0.00182 | 551  |
| 3007_C1_12578_EMLH_125.spltChi.qc.fq | 14415 | GGAATCTAGGCGATCCAGTTA  | A | 0    | GGAATCTAGGAGATCCAGTTA  | A | 150  | 0.00000 | 150  |
| 3007_C1_12579_EMLH_125.spltChi.qc.fq | 12395 | TAATCTCAAAATTAGCAGAGG  | T | 1    | TAATCTCAAAAATTAGCAGAGG | A | 1711 | 0.00058 | 1712 |
| 3007_C1_12579_EMLH_125.spltChi.qc.fq | 12758 | AACACTGGGGCATCTCTGTGC  | A | 1    | AACACTGGGGGCATCTCTGTGC | G | 675  | 0.00148 | 676  |
| 3007_C1_12579_EMLH_125.spltChi.qc.fq | 6140  | CTTTTCCAAAAACATTTTCC   | A | 0    | CTTTTCCAAAAGAACATTTTCC | G | 491  | 0.00000 | 491  |
| 3007_C1_12579_EMLH_125.spltChi.qc.fq | 2484  | TTATCATATGGTGAAGGATGA  | G | 1    | TTATCATATGATGAAGGATGA  | A | 475  | 0.00211 | 476  |
| 3007_C1_12579_EMLH_125.spltChi.qc.fq | 10199 | TCTGGGCTAACCCACCAAGGT  | C | 0    | CTGGGCTAACTCCACCAAGGT  | T | 340  | 0.00000 | 340  |
| 3007_C1_12579_EMLH_125.spltChi.qc.fq | 9719  | ATCCATCTCACCAAAAAATAA  | A | 0    | ATCCATCTCATCAAAAAATAA  | T | 288  | 0.00000 | 288  |
| 3007_C1_12580_EMLH_125.spltChi.qc.fq | 12395 | TAATCTCAAAATTAGCAGAGG  | T | 1    | TAATCTCAAAAATTAGCAGAGG | A | 643  | 0.00156 | 644  |
| 3007_C1_12580_EMLH_125.spltChi.qc.fq | 12758 | AACACTGGGGCATCTCTGTGC  | A | 0    | AACACTGGGGGCATCTCTGTGC | G | 259  | 0.00000 | 259  |
| 3007_C1_12580_EMLH_125.spltChi.qc.fq | 10199 | TCTGGGCTAACCCACCAAGGT  | C | 1    | CTGGGCTAACTCCACCAAGGT  | T | 187  | 0.00535 | 188  |
| 3007_C1_12580_EMLH_125.spltChi.qc.fq | 2484  | TTATCATATGGTGAAGGATGA  | G | 1    | TTATCATATGATGAAGGATGA  | A | 161  | 0.00621 | 162  |
| 3007_C1_12580_EMLH_125.spltChi.qc.fq | 6140  | CTTTTCCAAAAACATTTTCC   | A | 2    | CTTTTCCAAAAGAACATTTTCC | G | 154  | 0.01299 | 156  |
| 3007_C1_12580_EMLH_125.spltChi.qc.fq | 9719  | ATCCATCTCACCAAAAAATAA  | A | 0    | ATCCATCTCATCAAAAAATAA  | T | 109  | 0.00000 | 109  |
| 3007_C1_13247_EMLH_125.spltChi.qc.fq | 12395 | TAATCTCAAAATTAGCAGAGG  | T | 0    | TAATCTCAAAAATTAGCAGAGG | A | 4178 | 0.00000 | 4178 |

# SM\_Table 6 Page 4 Minor Variant Fractions

|                                      |                              |   |                             |   |      |         |      |
|--------------------------------------|------------------------------|---|-----------------------------|---|------|---------|------|
| 3007_C1_13247_EMLH_125.spltChi.qc.fq | 12758 AACACTGGGGACATCCTGTGC  | A | 0 AACACTGGGGGATCCTGTGC      | G | 1045 | 0.00000 | 1045 |
| 3007_C1_13247_EMLH_125.spltChi.qc.fq | 2484 TTATCATATGGTGAAGGATGA   | G | 1 TTATCATATGATGAAGGATGA     | A | 969  | 0.00103 | 970  |
| 3007_C1_13247_EMLH_125.spltChi.qc.fq | 6140 CTTTTCAAAAAACATTTTCC    | A | 0 CTTTTCAAAAAACATTTTCC      | G | 541  | 0.00000 | 541  |
| 3007_C1_13247_EMLH_125.spltChi.qc.fq | 10199 TCTGGGCTAACCCACCAAGGT  | C | 0 CTGGGCTAACTCCACCAAGGT     | T | 540  | 0.00000 | 540  |
| 3007_C1_13247_EMLH_125.spltChi.qc.fq | 9719 ATCCATCTCACCAAAAAATAA   | C | 0 ATCCATCTCATCAAAAAATAA     | T | 441  | 0.00000 | 441  |
| 3007_C1_442_EMLH_125.spltChi.qc.fq   | 2484 TTATCATATGGTGAAGGATGA   | G | 432 TTATCATATGATGAAGGATGA   | A | 0    | 0.00000 | 432  |
| 3007_C1_442_EMLH_125.spltChi.qc.fq   | 12395 TAACTCTCAAAATTAGCAGAGG | T | 399 TAACTCTCAAAATTAGCAGAGG  | A | 0    | 0.00000 | 399  |
| 3007_C1_442_EMLH_125.spltChi.qc.fq   | 12758 AACACTGGGGACATCCTGTGC  | A | 303 AACACTGGGGGATCCTGTGC    | G | 1    | 0.00330 | 304  |
| 3007_C1_442_EMLH_125.spltChi.qc.fq   | 6140 CTTTTCAAAAAACATTTTCC    | A | 253 CTTTTCAAAAAACATTTTCC    | G | 0    | 0.00000 | 253  |
| 3007_C1_442_EMLH_125.spltChi.qc.fq   | 10199 TCTGGGCTAACCCACCAAGGT  | C | 253 CTGGGCTAACTCCACCAAGGT   | T | 0    | 0.00000 | 253  |
| 3007_C1_442_EMLH_125.spltChi.qc.fq   | 9719 ATCCATCTCACCAAAAAATAA   | C | 110 ATCCATCTCATCAAAAAATAA   | T | 0    | 0.00000 | 110  |
| 3007_C1_443_EMLH_125.spltChi.qc.fq   | 12395 TAACTCTCAAAATTAGCAGAGG | T | 1145 TAACTCTCAAAATTAGCAGAGG | A | 0    | 0.00000 | 1145 |
| 3007_C1_443_EMLH_125.spltChi.qc.fq   | 12758 AACACTGGGGACATCCTGTGC  | A | 790 AACACTGGGGGATCCTGTGC    | G | 1    | 0.00127 | 791  |
| 3007_C1_443_EMLH_125.spltChi.qc.fq   | 2484 TTATCATATGGTGAAGGATGA   | G | 445 TTATCATATGATGAAGGATGA   | A | 2    | 0.00449 | 447  |
| 3007_C1_443_EMLH_125.spltChi.qc.fq   | 10199 TCTGGGCTAACCCACCAAGGT  | C | 426 CTGGGCTAACTCCACCAAGGT   | T | 3    | 0.00704 | 429  |
| 3007_C1_443_EMLH_125.spltChi.qc.fq   | 6140 CTTTTCAAAAAACATTTTCC    | A | 382 CTTTTCAAAAAACATTTTCC    | G | 0    | 0.00000 | 382  |
| 3007_C1_443_EMLH_125.spltChi.qc.fq   | 9719 ATCCATCTCACCAAAAAATAA   | C | 378 ATCCATCTCATCAAAAAATAA   | T | 0    | 0.00000 | 378  |
| 3007_C1_448_EMLH_125.spltChi.qc.fq   | 12395 TAACTCTCAAAATTAGCAGAGG | T | 694 TAACTCTCAAAATTAGCAGAGG  | A | 0    | 0.00000 | 694  |
| 3007_C1_448_EMLH_125.spltChi.qc.fq   | 12758 AACACTGGGGACATCCTGTGC  | A | 318 AACACTGGGGGATCCTGTGC    | G | 0    | 0.00000 | 318  |
| 3007_C1_448_EMLH_125.spltChi.qc.fq   | 10199 TCTGGGCTAACCCACCAAGGT  | C | 191 CTGGGCTAACTCCACCAAGGT   | T | 2    | 0.01047 | 193  |
| 3007_C1_448_EMLH_125.spltChi.qc.fq   | 2484 TTATCATATGGTGAAGGATGA   | G | 165 TTATCATATGATGAAGGATGA   | A | 0    | 0.00000 | 165  |
| 3007_C1_448_EMLH_125.spltChi.qc.fq   | 6140 CTTTTCAAAAAACATTTTCC    | A | 158 CTTTTCAAAAAACATTTTCC    | G | 0    | 0.00000 | 158  |
| 3007_C1_448_EMLH_125.spltChi.qc.fq   | 9719 ATCCATCTCACCAAAAAATAA   | C | 151 ATCCATCTCATCAAAAAATAA   | T | 0    | 0.00000 | 151  |
| 3007_C1_75708_EMLH_125.spltChi.qc.fq | 12395 TAACTCTCAAAATTAGCAGAGG | T | 0 TAACTCTCAAAATTAGCAGAGG    | A | 371  | 0.00000 | 371  |
| 3007_C1_75708_EMLH_125.spltChi.qc.fq | 12758 AACACTGGGGACATCCTGTGC  | A | 0 AACACTGGGGGATCCTGTGC      | G | 135  | 0.00000 | 135  |
| 3007_C1_75708_EMLH_125.spltChi.qc.fq | 6140 CTTTTCAAAAAACATTTTCC    | A | 0 CTTTTCAAAAAACATTTTCC      | G | 100  | 0.00000 | 100  |
| 3007_C1_77524_EMLK_125.spltChi.qc.fq | 12395 TAACTCTCAAAATTAGCAGAGG | T | 0 TAACTCTCAAAATTAGCAGAGG    | A | 352  | 0.00000 | 352  |
| 3007_C1_77524_EMLK_125.spltChi.qc.fq | 12758 AACACTGGGGACATCCTGTGC  | A | 0 AACACTGGGGGATCCTGTGC      | G | 171  | 0.00000 | 171  |
| 3007_C1_77524_EMLK_125.spltChi.qc.fq | 6140 CTTTTCAAAAAACATTTTCC    | A | 0 CTTTTCAAAAAACATTTTCC      | G | 100  | 0.00000 | 100  |
| 3007_C1_77525_EMLK_125.spltChi.qc.fq | 12395 TAACTCTCAAAATTAGCAGAGG | T | 2 TAACTCTCAAAATTAGCAGAGG    | A | 8431 | 0.00024 | 8433 |
| 3007_C1_77525_EMLK_125.spltChi.qc.fq | 2484 TTATCATATGGTGAAGGATGA   | G | 10 TTATCATATGATGAAGGATGA    | A | 3560 | 0.00281 | 3570 |
| 3007_C1_77525_EMLK_125.spltChi.qc.fq | 6140 CTTTTCAAAAAACATTTTCC    | A | 0 CTTTTCAAAAAACATTTTCC      | G | 1837 | 0.00000 | 1837 |
| 3007_C1_77525_EMLK_125.spltChi.qc.fq | 12758 AACACTGGGGACATCCTGTGC  | A | 2 AACACTGGGGGATCCTGTGC      | G | 1581 | 0.00127 | 1583 |
| 3007_C1_77525_EMLK_125.spltChi.qc.fq | 9719 ATCCATCTCACCAAAAAATAA   | C | 1 ATCCATCTCATCAAAAAATAA     | T | 574  | 0.00174 | 575  |
| 3007_C1_77526_EMLK_125.spltChi.qc.fq | 2484 TTATCATATGGTGAAGGATGA   | G | 4 TTATCATATGATGAAGGATGA     | A | 2240 | 0.00179 | 2244 |
| 3007_C1_77526_EMLK_125.spltChi.qc.fq | 12395 TAACTCTCAAAATTAGCAGAGG | T | 0 TAACTCTCAAAATTAGCAGAGG    | A | 1054 | 0.00000 | 1054 |
| 3007_C1_77526_EMLK_125.spltChi.qc.fq | 10199 TCTGGGCTAACCCACCAAGGT  | C | 0 CTGGGCTAACTCCACCAAGGT     | T | 926  | 0.00000 | 926  |
| 3007_C1_77526_EMLK_125.spltChi.qc.fq | 12758 AACACTGGGGACATCCTGTGC  | A | 2 AACACTGGGGGATCCTGTGC      | G | 615  | 0.00325 | 617  |
| 3007_C1_77526_EMLK_125.spltChi.qc.fq | 6140 CTTTTCAAAAAACATTTTCC    | A | 0 CTTTTCAAAAAACATTTTCC      | G | 512  | 0.00000 | 512  |
| 3007_C1_77526_EMLK_125.spltChi.qc.fq | 9719 ATCCATCTCACCAAAAAATAA   | C | 0 ATCCATCTCATCAAAAAATAA     | T | 126  | 0.00000 | 126  |
| 3007_C1_77529_EMLK_125.spltChi.qc.fq | 2484 TTATCATATGGTGAAGGATGA   | G | 2 TTATCATATGATGAAGGATGA     | A | 1924 | 0.00104 | 1926 |
| 3007_C1_77529_EMLK_125.spltChi.qc.fq | 12395 TAACTCTCAAAATTAGCAGAGG | T | 0 TAACTCTCAAAATTAGCAGAGG    | A | 1007 | 0.00000 | 1007 |
| 3007_C1_77529_EMLK_125.spltChi.qc.fq | 6140 CTTTTCAAAAAACATTTTCC    | A | 1 CTTTTCAAAAAACATTTTCC      | G | 851  | 0.00118 | 852  |
| 3007_C1_77529_EMLK_125.spltChi.qc.fq | 10199 TCTGGGCTAACCCACCAAGGT  | C | 1 CTGGGCTAACTCCACCAAGGT     | T | 756  | 0.00132 | 757  |
| 3007_C1_77529_EMLK_125.spltChi.qc.fq | 12758 AACACTGGGGACATCCTGTGC  | A | 0 AACACTGGGGGATCCTGTGC      | G | 719  | 0.00000 | 719  |
| 3007_C1_77549_EMLK_125.spltChi.qc.fq | 12395 TAACTCTCAAAATTAGCAGAGG | T | 0 TAACTCTCAAAATTAGCAGAGG    | A | 141  | 0.00000 | 141  |
| 3007_C1_77551_EMLK_125.spltChi.qc.fq | 12395 TAACTCTCAAAATTAGCAGAGG | T | 0 TAACTCTCAAAATTAGCAGAGG    | A | 555  | 0.00000 | 555  |
| 3007_C1_77551_EMLK_125.spltChi.qc.fq | 12758 AACACTGGGGACATCCTGTGC  | A | 0 AACACTGGGGGATCCTGTGC      | G | 247  | 0.00000 | 247  |
| 3007_C1_77551_EMLK_125.spltChi.qc.fq | 6140 CTTTTCAAAAAACATTTTCC    | A | 0 CTTTTCAAAAAACATTTTCC      | G | 188  | 0.00000 | 188  |
| 3007_C1_77551_EMLK_125.spltChi.qc.fq | 2484 TTATCATATGGTGAAGGATGA   | G | 1 TTATCATATGATGAAGGATGA     | A | 117  | 0.00855 | 118  |
| 3007_C1_77551_EMLK_125.spltChi.qc.fq | 10199 TCTGGGCTAACCCACCAAGGT  | C | 0 CTGGGCTAACTCCACCAAGGT     | T | 112  | 0.00000 | 112  |
| 3007_C1_77558_EMLK_125.spltChi.qc.fq | 12395 TAACTCTCAAAATTAGCAGAGG | T | 0 TAACTCTCAAAATTAGCAGAGG    | A | 813  | 0.00000 | 813  |
| 3007_C1_77558_EMLK_125.spltChi.qc.fq | 12758 AACACTGGGGACATCCTGTGC  | A | 0 AACACTGGGGGATCCTGTGC      | G | 303  | 0.00000 | 303  |
| 3007_C1_77558_EMLK_125.spltChi.qc.fq | 10199 TCTGGGCTAACCCACCAAGGT  | C | 0 CTGGGCTAACTCCACCAAGGT     | T | 259  | 0.00000 | 259  |
| 3007_C1_77558_EMLK_125.spltChi.qc.fq | 2484 TTATCATATGGTGAAGGATGA   | G | 2 TTATCATATGATGAAGGATGA     | A | 226  | 0.00885 | 228  |
| 3007_C1_77558_EMLK_125.spltChi.qc.fq | 6140 CTTTTCAAAAAACATTTTCC    | A | 1 CTTTTCAAAAAACATTTTCC      | G | 220  | 0.00455 | 221  |
| 3007_C1_77558_EMLK_125.spltChi.qc.fq | 9719 ATCCATCTCACCAAAAAATAA   | C | 0 ATCCATCTCATCAAAAAATAA     | T | 148  | 0.00000 | 148  |
| 3007_C1_77563_EMLK_125.spltChi.qc.fq | 12395 TAACTCTCAAAATTAGCAGAGG | T | 0 TAACTCTCAAAATTAGCAGAGG    | A | 1466 | 0.00000 | 1466 |
| 3007_C1_77563_EMLK_125.spltChi.qc.fq | 12758 AACACTGGGGACATCCTGTGC  | A | 1 AACACTGGGGGATCCTGTGC      | G | 498  | 0.00201 | 499  |
| 3007_C1_77563_EMLK_125.spltChi.qc.fq | 6140 CTTTTCAAAAAACATTTTCC    | A | 0 CTTTTCAAAAAACATTTTCC      | G | 430  | 0.00000 | 430  |
| 3007_C1_77563_EMLK_125.spltChi.qc.fq | 2484 TTATCATATGGTGAAGGATGA   | G | 0 TTATCATATGATGAAGGATGA     | A | 338  | 0.00000 | 338  |
| 3007_C1_77563_EMLK_125.spltChi.qc.fq | 10199 TCTGGGCTAACCCACCAAGGT  | C | 1 CTGGGCTAACTCCACCAAGGT     | T | 337  | 0.00297 | 338  |
| 3007_C1_77563_EMLK_125.spltChi.qc.fq | 9719 ATCCATCTCACCAAAAAATAA   | C | 0 ATCCATCTCATCAAAAAATAA     | T | 237  | 0.00000 | 237  |
| 3007_C1_77572_EMLK_125.spltChi.qc.fq | 12395 TAACTCTCAAAATTAGCAGAGG | T | 0 TAACTCTCAAAATTAGCAGAGG    | A | 429  | 0.00000 | 429  |
| 3007_C1_77572_EMLK_125.spltChi.qc.fq | 12758 AACACTGGGGACATCCTGTGC  | A | 0 AACACTGGGGGATCCTGTGC      | G | 179  | 0.00000 | 179  |
| 3007_C1_77572_EMLK_125.spltChi.qc.fq | 10199 TCTGGGCTAACCCACCAAGGT  | C | 0 CTGGGCTAACTCCACCAAGGT     | T | 117  | 0.00000 | 117  |
| 3007_C1_77572_EMLK_125.spltChi.qc.fq | 6140 CTTTTCAAAAAACATTTTCC    | A | 0 CTTTTCAAAAAACATTTTCC      | G | 100  | 0.00000 | 100  |
| 3007_C1_77572_EMLK_125.spltChi.qc.fq | 12395 TAACTCTCAAAATTAGCAGAGG | T | 0 TAACTCTCAAAATTAGCAGAGG    | A | 817  | 0.00000 | 817  |
| 3007_C1_KT7095_125.spltChi.qc.fq     | 12758 AACACTGGGGACATCCTGTGC  | A | 1 AACACTGGGGGATCCTGTGC      | G | 319  | 0.00313 | 320  |
| 3007_C1_KT7095_125.spltChi.qc.fq     | 6140 CTTTTCAAAAAACATTTTCC    | A | 0 CTTTTCAAAAAACATTTTCC      | G | 213  | 0.00000 | 213  |
| 3007_C1_KT7095_125.spltChi.qc.fq     | 10199 TCTGGGCTAACCCACCAAGGT  | C | 1 CTGGGCTAACTCCACCAAGGT     | T | 157  | 0.00637 | 158  |
| 3007_C1_KT7095_125.spltChi.qc.fq     | 2484 TTATCATATGGTGAAGGATGA   | G | 0 TTATCATATGATGAAGGATGA     | A | 138  | 0.00000 | 138  |
| 3007_C1_KT7095_125.spltChi.qc.fq     | 9719 ATCCATCTCACCAAAAAATAA   | C | 0 ATCCATCTCATCAAAAAATAA     | T | 112  | 0.00000 | 112  |
| 3007_C1_MK9396_125.spltChi.qc.fq     | 12395 TAACTCTCAAAATTAGCAGAGG | T | 1 TAACTCTCAAAATTAGCAGAGG    | A | 4662 | 0.00021 | 4663 |
| 3007_C1_MK9396_125.spltChi.qc.fq     | 2484 TTATCATATGGTGAAGGATGA   | G | 4 TTATCATATGATGAAGGATGA     | A | 1708 | 0.00234 | 1712 |
| 3007_C1_MK9396_125.spltChi.qc.fq     | 12758 AACACTGGGGACATCCTGTGC  | A | 1 AACACTGGGGGATCCTGTGC      | G | 1004 | 0.00100 | 1005 |
| 3007_C1_MK9396_125.spltChi.qc.fq     | 6140 CTTTTCAAAAAACATTTTCC    | A | 0 CTTTTCAAAAAACATTTTCC      | G | 914  | 0.00000 | 914  |
| 3007_C1_MK9396_125.spltChi.qc.fq     | 10199 TCTGGGCTAACCCACCAAGGT  | C | 0 CTGGGCTAACTCCACCAAGGT     | T | 658  | 0.00000 | 658  |
| 3007_C1_MK9396_125.spltChi.qc.fq     | 9719 ATCCATCTCACCAAAAAATAA   | C | 0 ATCCATCTCATCAAAAAATAA     | T | 375  | 0.00000 | 375  |
